# Supplementary material
Source: PubMed Central journal article supplement (PMC3180810)
Supplement: supp_tpc.111.086827_SupplementalDataRevised.pdf [file supp_tpc.111.086827_SupplementalDataRevised.pdf]

**Supplemental Data for:**

**Elucidation of the Pathway to Astaxanthin in the Flowers of *Adonis aestivalis***

**Francis X. Cunningham, Jr. and Elisabeth Gantt**

Department of Cell Biology and Molecular Genetics

University of Maryland, College Park, MD 20742 USA

**Supplemental Figure 1 (below).** The Product of the *hbfd1* cDNA Does Not Modify Carotenoid 3-Hydroxy- $\beta$ -Rings, the Activity of an *Erwinia herbicola* CrtZ-type  $\beta$ -Ring 3-Hydroxylase Enzyme (encoded by the *crtZ* gene in plasmid pAC-ZEAXipi) Impairs the Conversion of  $\beta$ -Carotene into Astaxanthin, and the Products of the *A. aestivalis cbfd2* cDNA and the *E. herbicola crtZ* Gene Together Convert  $\beta$ -Carotene into a Compound with a Retention Time, Absorption Spectrum, and Molecular Mass Indicative of a Tetrahydroxy-Carotenoid, Probably  $\beta,\beta$ -Carotene-3,4,3',4'-Tetrol. Shown are HPLC elution profiles for extracts of *E. coli* wherein cells contained the following plasmids: **(A)**, pAC-ZEAXipi; **(B)**, pAC-ZEAXipi and pCBFD2; **(C)**, pAC-ZEAXipi and pHBFD1Bad; **(D)**, pAC-ZEAXipi and pCBFD1/HBFD1Bad. Panel **(E)** displays absorption spectra (in the HPLC mobile phase) for the major peaks in **(B)** and **(D)** and for a synthetic astaxanthin standard [peak in panel **(E)** of Figure 3 of the manuscript]. Panel **(F)** shows absorption spectra for selected peaks of panel **(D)**. Numbers in parentheses below the carotenoid names in panels **(A)**, **(B)**, **(C)** and **(D)** are HPLC retention times in minutes. Labels for the absorption spectra in **(E)** and **(F)** refer to the HPLC retention times for the corresponding peaks in **(B)** and **(D)**, and, in the case of the synthetic astaxanthin standard, in panel **(E)** of Figure 3 of the manuscript. Absorption maxima are listed below these retention times, with peak “shoulders” enclosed in parentheses. Spectra were recorded in the HPLC mobile phase just as the individual pigments eluted from the HPLC column. Those peak identifications indicated with red text and followed by question marks in panels **(B)** and **(D)** are speculative: they are consistent with the absorption spectra, the HPLC retention times, and the known catalytic capabilities of the carotenoid pathway enzymes that are present in the *E. coli* cells, but the requisite standards were not available for comparison. The plasmid pAC-ZEAXipi (Cunningham and Gantt, 2007) contains carotenoid pathway genes from *E. herbicola* that lead to the synthesis and accumulation

of zeaxanthin (3,3'-dihydroxy- $\beta,\beta$ -carotene) in *E. coli*. Extracts for which the elution profiles are shown in (C) and (D) were from cultures grown in liquid media containing arabinose (0.2%, w/v) in order to induce production of the HBFD1 polypeptide. **Note:** because considerable amounts of both zeaxanthin ( $\beta,\beta$ -carotene-3,3'-diol) and isozeaxanthin ( $\beta,\beta$ -carotene-4,4'-diol) were present in extracts of *E. coli* cultures containing pAC-ZEAXipi and pCBFD2 [panel (B)], it is not clear whether 3,4-dihydroxy- $\beta$ -rings are made from 3-hydroxy- $\beta$ -rings [with hydroxylation of the number 4 carbon then catalyzed by the product of the *cbfd2* (*AdKeto2*) cDNA] or from 4-hydroxy- $\beta$ -rings (with hydroxylation of the number 3 carbon then catalyzed by the CrtZ enzyme) or *via* both of these routes.

**Reference for Supplemental Figure 1:**

**Cunningham, F.X. Jr., and Gantt, E.** (2007) A portfolio of plasmids for identification and analysis of carotenoid pathway enzymes: *Adonis aestivalis* as a case study. *Photosynth. Res.* **92:** 245-259.

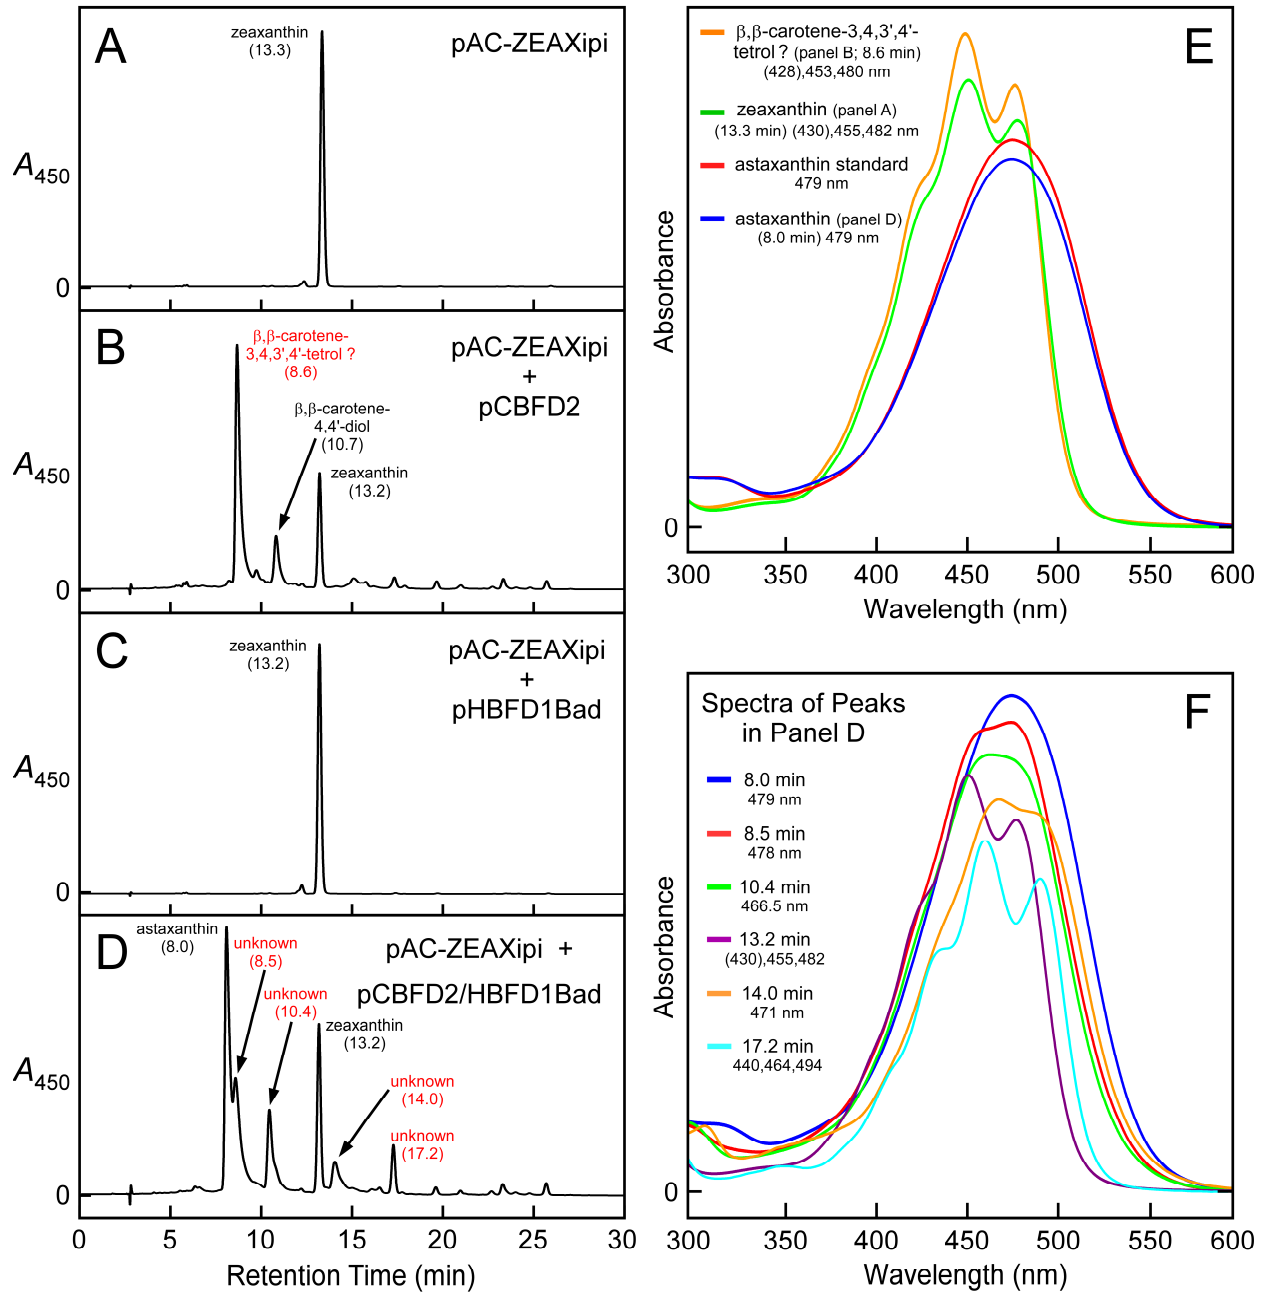

**Supplemental Figure 2 (below).** Three SALK T-DNA Homozygous Lines with Insertions Within or Immediately Upstream of the Coding Region of *A. thaliana* Gene *At1g50450*, Which Encodes a Polypeptide Similar in Sequence to the Product of the *A. aestivalis hbfd1* and *hbfd2* cDNAs, do not Differ from Wild-Type *A. thaliana* Plants in the Content and Composition of the Carotenoids Within Their Leaves. Shown are HPLC elution profiles for extracts of young leaves of: **(A)**, the wild-type parent strain (Col-0; ABRC Stock number CS60000). **(B)**, Salk\_137455C mutant [insertion in 3<sup>rd</sup> of 6 exons of *At1g67080* (*aba4*)]. **(C)**, Salk\_019364C mutant [insertion in the 3<sup>rd</sup> of 11 exons of *At5g57030* (*lut2*), which encodes a lycopene  $\epsilon$ -ring cyclase enzyme (LCYe)] **(D)** Salk\_060961C mutant (insertion in the 5' UTR of *At1g50450*, near to the initiation codon). **(E)**, Salk\_150621C mutant (insertion in the 1<sup>st</sup> exon of *At1g50450*). **(F)**, Salk\_070593C mutant (insertion in the 12<sup>th</sup> of 13 exons of *At1g50450*). **(G)**, Absorption spectra, in HPLC mobile phase, of selected peaks in panel (A). Absorption maxima for each pigment are in parentheses. **(H)**, Absorption spectra, in HPLC mobile phase, of selected peaks in panel (C). Absorption maxima for each pigment are in parentheses. The absorption spectra displayed in panels (G) and (H) support the identifications of the corresponding peaks in panels (A) and (C). Elution profiles for the *aba4* and *lut2* mutants are shown here because they assist in the identification of several of the carotenoid peaks in the elution profiles of the wild-type and *At1g50450* insertion mutants. The *aba4* mutant [panel (B)] lacks neoxanthin, as reported earlier for other mutants with insertions in gene *At1g67080* (North et al., 2007). The *lut2* mutant [panel (C)], lacks carotenoids with  $\epsilon$ -rings (lutein and  $\alpha$ -carotene) and has increased amounts, relative to chlorophyll *a*, of most  $\beta$ -ring carotenoids including violaxanthin, antheraxanthin, zeaxanthin, and  $\beta$ -carotene, as reported earlier for another *lut2* mutant (Pogson et al., 1996). Extraction of carotenoid pigments and HPLC analysis were generally as described in Norris et al., (1995), but with some minor modifications. Young leaves from short day plants were collected near the end of the dark period, briefly ground with a Teflon pestle in a 1.5 mL microfuge tube, and then extracted first with absolute acetone and then with ethyl acetate. The extracts were transferred to and combined in a second microfuge tube, water was then added, the tube was centrifuged briefly, and the epiphase containing the chlorophyll and carotenoid pigments was collected and evaporated under a stream of nitrogen. The pigments were then resolubilized in a small volume of the initial HPLC mobile phase. The HPLC separation utilized a gradient of 4-50% mobile phase B in A over the course of 35 min. The *A. thaliana* wild-type, as well as each of the



mutants, was of the Col-0 ecotype. Seeds for the wild-type and mutant lines were obtained from the ABRC at The Ohio State University. The SALK T-DNA Insertion Lines are described in Alonso et al., (2003). **Abbreviations:** ABRC, Arabidopsis Biological Resource Center; UTR, untranslated region.

**References for Supplemental Figure 2:**

- Alonso, J.M., et al.,** (2003) Genome-wide insertional mutagenesis of *Arabidopsis thaliana*. Science **301**: 653-657.
- Norris, S.R., Barrette, T.R., and DellaPenna, D.** (1995) Genetic dissection of carotenoid synthesis in Arabidopsis defines plastoquinone as an essential component of phytoene desaturation. Plant Cell. **7**: 2139-2149.
- North, H.M., De Almeida, A., Boutin, J.P., Frey, A., To, A., Botran, L., Sotta, B., and Marion-Poll, A.** (2007) The Arabidopsis ABA-deficient mutant *aba4* demonstrates that the major route for stress-induced ABA accumulation is *via* neoxanthin isomers. Plant J. **50**: 810-824.
- Pogson, B., McDonald, K.A., Truong, M., Britton, G., and DellaPenna, D.** (1996) Arabidopsis carotenoid mutants demonstrate that lutein is not essential for photosynthesis in higher plants. Plant Cell **8**: 1627-1639.

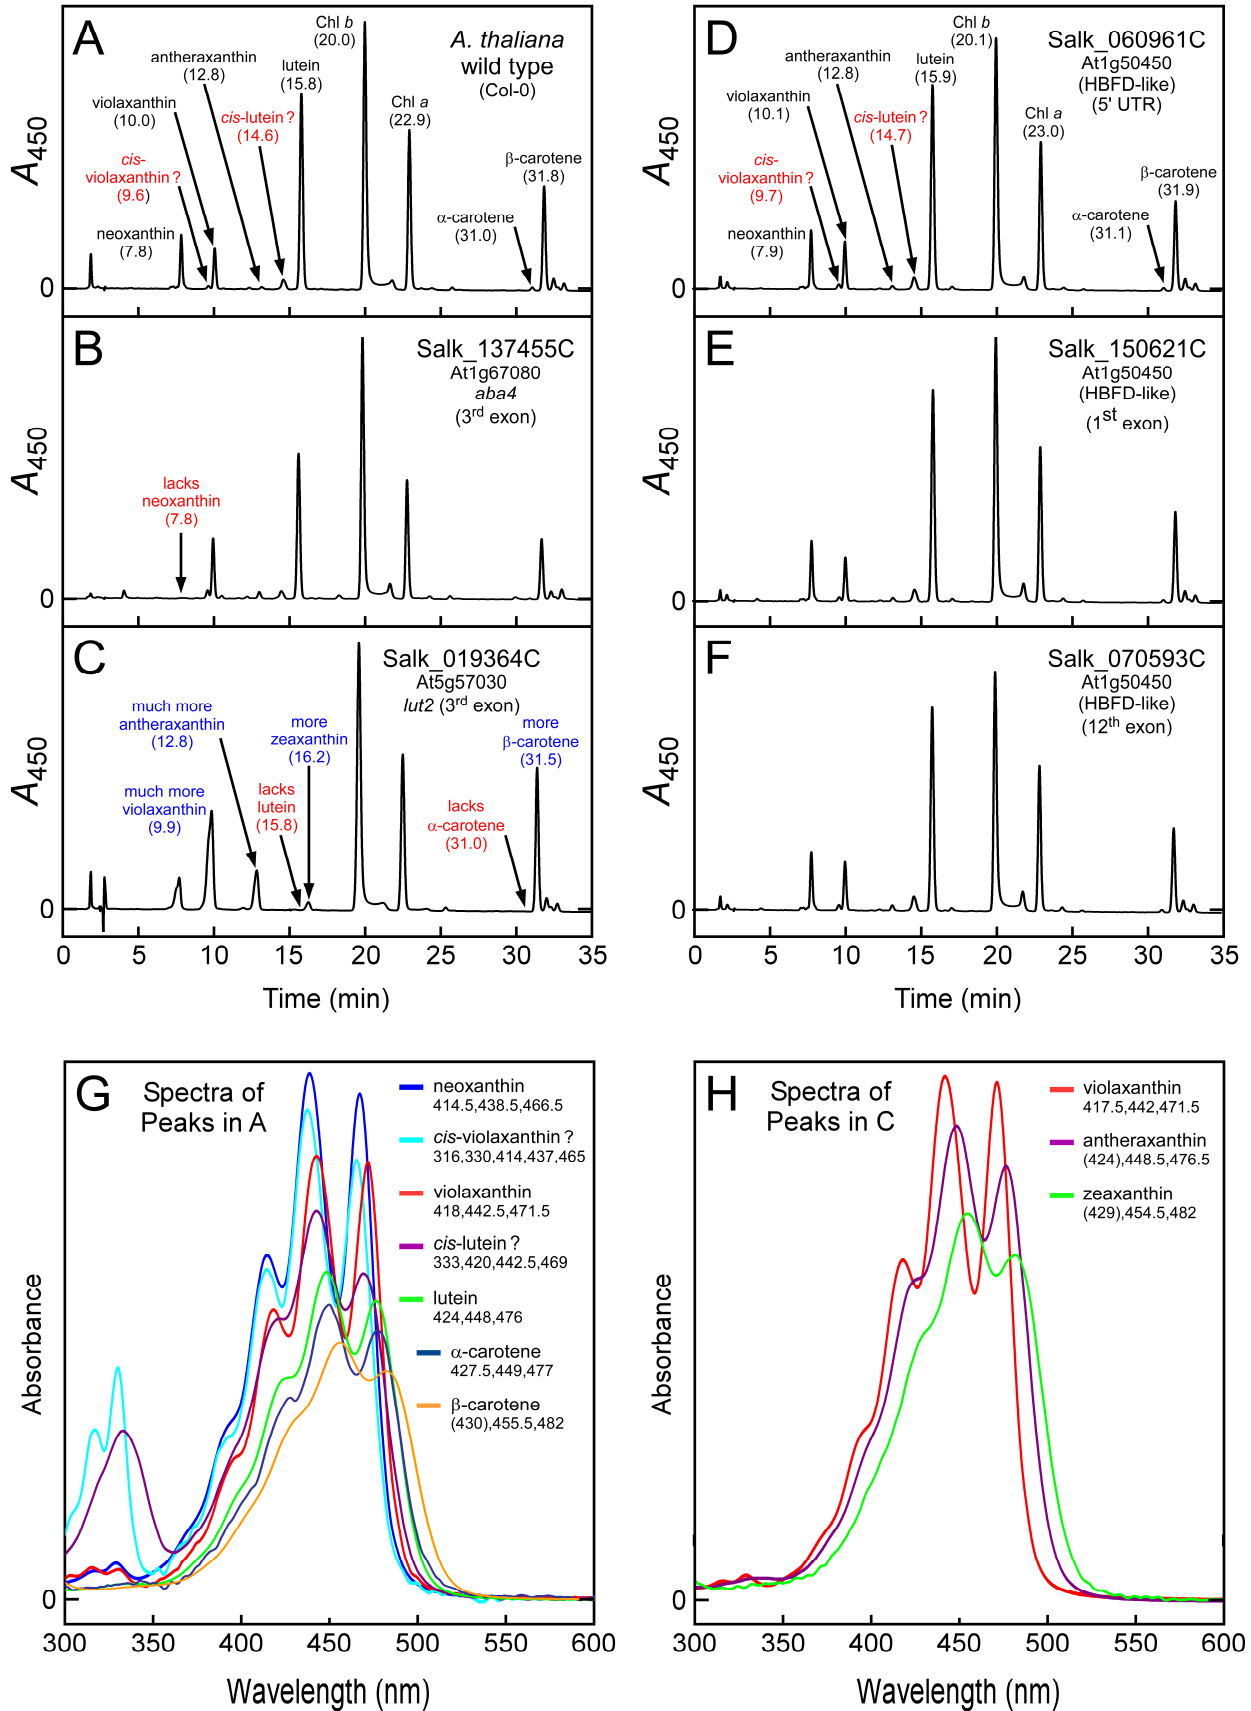

**Supplemental Figure 3 (below).** Alignment of Plant and Green Algal CHYb-Type Carotenoid  $\beta$ -Ring 3-Hydroxylase Enzymes and Polypeptides Encoded by the *A. aestivalis* *cbfd1* and *cbfd2* cDNAs. The alignment was produced using MAFFT version 6 (Kato and Toh, 2008; the server at <http://mafft.cbrc.jp/alignment/server/> was used). The E-INS-i strategy was employed with the BLOSUM45 scoring matrix, a gap opening penalty of 1.0 and an offset value of 0.1. The output was manually adjusted to optimize the alignment. Residues are in white text on a black background where all sequences have the same amino acid, in white text on a dark grey background where 75% or more residues are identical, and in black text on a light grey background where 50% or more of the sequences have the same amino acid. Three residues of the *A. aestivalis* Cbfd1 and Cbfd2 polypeptides are highlighted in red where CHYb polypeptides have well-conserved proline residues adjacent to two of the conserved histidine motifs that are believed to comprise part of the active site in enzymes of this family (the membrane-associated fatty acid desaturase family; Shanklin et al., 1994). Cbfd1 and Cbfd2 do not have prolines in these positions, and are therefore likely to have a somewhat different geometry about the active site. The sequences used to construct this alignment were obtained from the GenBank protein database (all full length amino acid sequences identified using a blastp search on 2/18/2010), or they were generated by assembly and translation of overlapping expressed sequence tags (ESTs) obtained *via* a tblastn search of the GenBank nucleotide database and/or the database of ESTs. **GenBank Accession Numbers:** *A. aestivalis* Cbfd2, AY644758; *A. aestivalis* Cbfd1 (partial), AY644757; *B. rapa* 1, AAS55552; *B. rapa* 2, ACS45170; *A. thaliana* 1, NP\_194300; *A. thaliana* 2, NP\_200070; *G. max* 2, assembly of FK002367 and CX702394; *M. truncatula*, assembly of EV258794 and AW774742; *G. max* 1, ACU18541; *P. trichocarpa* 1, XP\_002327604; *P. trichocarpa* 2, XP\_002305933; *R. communis* 1, XP\_002513654; *C. unshiu*, AAG10793; *D. kaki*, ACN86365; *V. vinifera* 2, assembly of CB342437 and EC952475; *I. nil*, BAI47580; *S. lycopersicum* 1, CAB55626; *C. annuum* 1, CAA70427; *C. arabica*, ABA43903; *S. lycopersicum* 2, CAB55625; *C. annuum* 2, assembly of GD111816 and GD133362; *V. vinifera* 1, AAM77007; *G. lutea*, BAE92729; *A. aestivalis* CHYb, ABI93208; *D. carota* 1, ABB52074; *Z. mays* 2, NP\_001148085; *S. bicolor* 1, XP\_002465958; *O. sativa japonica* 1, ABF93742; *O. sativa japonica* 3, NP\_001065155; *E. oleifera*, ABS76147; *Z. mays* 3, NP\_001105865; *S. bicolor* 2, XP\_002446979; *O. sativa japonica* 2, NP\_001053640; *Z. mays* 1, NP\_001105907; *T. erecta*, AAG10430; *C. sativus* 1, CAC95130; *C. sativus* 2,

AAT84408; *N. pseudonarcissus*, CAC06712; *D. carota* 2, ABB52075; *R. communis* 2, XP\_002509848; *Oncidium* Gower Ramsay, ACP27626; *P. sitchensis* 1, ABK24778; *P. sitchensis* 2, ABK25382; *P. taeda* 1, assembly of DT638806 and DR021786; *P. taeda* 2, assembly of DR013495 and DR167448; *M. zofingiensis*, ABS50237; *H. pluvialis*, AAD54243; *C. reinhardtii*, XP\_001698698.

**Reference for Supplemental Figure 3:**

**Katoh, K., and Toh, H.** (2008) Recent developments in the MAFFT multiple sequence alignment program. *Brief. Bioinform.* **9**: 286-298.

**Shanklin, J., Whittle, E., and Fox, B.G.** (1994) Eight histidine residues are catalytically essential in a membrane-associated iron enzyme, stearoyl-CoA desaturase, and are conserved in alkane hydroxylase and xylene monooxygenase. *Biochemistry* **33**: 12787-12794.

|                                | * | 20    | *             | 40             | *          | 60      |          |           |                                |                      |           |        |          |       |      |    |    |
|--------------------------------|---|-------|---------------|----------------|------------|---------|----------|-----------|--------------------------------|----------------------|-----------|--------|----------|-------|------|----|----|
| <b>Adonis aestivalis</b> CBFD2 | : | M--AA | AISV-FSSG     | ----           | YSFY       | ----    | KNL-LL-- | DSK--     | PNILKPP                        | ----                 | CLLF      | SPVVI  | :        | 39    |      |    |    |
| <b>Adonis aestivalis</b> CBFD1 | : | M--   | AISV-FSTS     | ----           | YSFH       | ----    | KNL-LL-- | HSK--     | QDILNRP                        | ----                 | CLLF      | SPVVI  | :        | 36    |      |    |    |
| Brassica rapa 1                | : | M--   | AAGLST-TVTF   | NP-LHRSFSSSSS  | --         | VR--    | LHH--    | PRS       | -----                          | LTGLPSS              | --        |        | :        | 38    |      |    |    |
| Brassica rapa 2                | : | M--   | AAGLST-ALTF   | KP-LHRAFSSSSS  | --         | LR--    | LHH--    | PTS       | -----                          | LTGLPSS              | --        |        | :        | 38    |      |    |    |
| Arabidopsis thaliana 1         | : | M--   | AAGLST-AVTF   | KP-LHRSFSSSSTD | FR--       | LRL--   | PKS      | -----     | LSGFSPS                        | --                   |           | :      | 39       |       |      |    |    |
| Arabidopsis thaliana 2         | : | M--   | AAGLSTIAVTL   | KP-LN          | ----       | RSS-FS  | ----     | ANH--     | PIS                            | -----                | TAVFPPLR  |        | :        | 36    |      |    |    |
| Glycine max 2                  | : | M--   | AAGLST-AAIL   | KP-YNLV        | ----       | QPP-IP  | ----     | LSK--     | PTT                            | -----                | SLFFNPLRC |        | :        | 37    |      |    |    |
| Medicago truncatula            | : | M--   | AAELYT-ATTL   | KP-YNLL        | ----       | QPS-TS  | ----     | SPS--     | PSPK                           | -----                | TLFFTP    | PLRS   | :        | 38    |      |    |    |
| Glycine max 1                  | : | M--   | AAGLSA-AITM   | KPLLRFH        | ----       | QPR     | ----     | LPK--     | PIPT                           | -----                | TLFFSP    | PLRI   | :        | 37    |      |    |    |
| Populus trichocarpa 1          | : | M--   | AAGLTA-ATVP   | KP-FRYN        | ----       | SVS-HL  | ----     | LPK--     | PVTA                           | -----                | ASLFFP    | PIRI   | :        | 38    |      |    |    |
| Populus trichocarpa 2          | : | M--   | ASGITA-ATVS   | KP-SGYI        | ----       | FTS-HL  | ----     | LQK--     | PITT                           | -----                | TSLSL     | PFIR   | :        | 38    |      |    |    |
| Ricinus communis 1             | : | M--   | AAGLSA-APVF   | KP-FRYI        | ----       | NAS-YI  | ----     | LPK--     | PLP                            | -----                | TSLVP     | PSTR   | :        | 37    |      |    |    |
| Citrus unshiu                  | : | M--   | AVGLLA-AIVP   | KP-FCLLT       | TKLQPSLL   | ----    | TTK--    | P         | -----                          | APL                  | FAP       | LG     | :        | 40    |      |    |    |
| Diospyros kaki                 | : | M--   | PAGISI-AASGR  | PSFILTR        | ----       | KYP-LL  | ----     | GPG--     | PESTISTP                       | ----                 | TCLF      | SLPAR  | :        | 44    |      |    |    |
| Vitis vinifera 2               | : | M--   | AVEISV-ATTS   | ----           | RLG        | ----    | RNP-FL   | ----      | GLK--                          | PTSP                 | ----      | FTP    | ----     | TSLSL | PSIR | :  | 38 |
| Ipomea nil                     | : | M--   | AVGISI-AASS   | RT-VYSC        | ----       | QFS-LV  | ----     | RPA--     | THSA-SPP                       | ----                 | SLLF      | SPLSR  | :        | 41    |      |    |    |
| Solanum lycopersicum 1         | : | M--   | AAGISA-SASS   | RT-IRLR        | ----       | HNP-FL  | ----     | SPK--     | SAST-APP                       | ----                 | VLFF      | SPLTR  | :        | 41    |      |    |    |
| Capsicum annuum 1              | : | M--   | AAEISI-SASS   | RA-ICLQ        | ----       | RNP-FP  | ----     | APK--     | YFAT-APP                       | ----                 | LLFF      | SPLTC  | :        | 41    |      |    |    |
| Coffea arabica                 | : | M--   | AAGIAV-AAGA   | QT-VCFR        | ----       | VNS-FL  | ----     | TRK--     | PTSL-VAD                       | ----                 | SLT       | SLPLAQ | :        | 41    |      |    |    |
| Solanum lycopersicum 2         | : | M     | AAARISA-SSTS  | RT-FYFR        | ----       | HSP-FL  | ----     | GPK--     | PTST-TSH                       | ----                 | VSPIS     | PFSL   | :        | 43    |      |    |    |
| Capsicum annuum 2              | : | M     | AAARISF-SSTS  | RT-SYR         | ----       | HSP-FL  | ----     | GPK--     | PTPT-TPS                       | ----                 | VYPIT     | PFSP   | :        | 42    |      |    |    |
| Vitis vinifera 1               | : | M--   | ATGISA-SLNS   | MS-CRLG        | ----       | RNS-FT  | ----     | ATG--     | PSSV-ISL                       | ----                 | SSFLT     | PVTH   | :        | 41    |      |    |    |
| Gentiana lutea                 | : | M     | ETQFLVSG-RNSN | ----           | IHC        | RIDS    | ISSS     | SL        | ----                           | TPKSSPVST            | ----      | STP    | ----     | TLVVF | PPFK | :  | 47 |
| <b>Adonis aestivalis</b> CHYb  | : | M--   | AAATSI-TSSS   | RA-FRFH        | ----       | RSL-FL  | ----     | NTK--     | PNIR-NPP                       | ----                 | CLLF      | SPLLM  | :        | 41    |      |    |    |
| Daucus carota 1                | : | M--   | AAGISA-ASSS   | TS-FSLG        | ----       | RNP-FL  | ----     | GPN--     | P                              | -----                | IWL       | FAPSVR | :        | 35    |      |    |    |
| Zea mays 2                     | : | M     | AVARLVSA      | ----           | ----       | PPF     | ----     | ----      | ----                           | ----                 | ----      | LAP    | LRV      | :     | 18   |    |    |
| Sorghum bicolor 1              | : | M     | AVARLLAA      | ----           | ----       | PPF     | ----     | ----      | ----                           | ----                 | ----      | LAP    | CRV      | :     | 18   |    |    |
| Oryza sativa japonica 1        | : | M     | AVARLVAA      | ----           | ----       | RAP-LL  | ----     | SPA       | AVAAHRSPPALLR                  | ----                 | LAF       | APLPA  | :        | 39    |      |    |    |
| Oryza sativa japonica 3        | : | M     | AVARLVVI      | ----           | ----       | TPAVL   | ----     | ----      | ----                           | ----                 | ----      | LGRT   | ARVSPSAV | :     | 26   |    |    |
| Elaeis oleifera                | : | M--   | APGISA-SVTC   | ----           | GIG        | ----    | RNP-FL   | ----      | RSPHRC                         | LVAADC               | VQ        | LAP    | PLS      | :     | 40   |    |    |
| Zea mays 3                     | : | M--   | AAGLSG-AAMT   | ----           | GFVA       | ----    | KNP-LL   | ----      | AAA--                          | ARRRALP              | PLAGRALP  | SP     | PLTT     | :     | 44   |    |    |
| Sorghum bicolor 2              | : | M--   | AAGLSG-AAMT   | ----           | GFVA       | ----    | KNP-LL   | ----      | AAA--                          | ARRRALP              | PLAGRALP  | SP     | PLTT     | :     | 45   |    |    |
| Oryza sativa japonica 2        | : | M--   | ATGLSG-GAMT   | ----           | SFAV       | ----    | KKP-LL   | ----      | AAA--                          | VRRRSW               | PPSGRALP  | SP     | PL--     | :     | 42   |    |    |
| Zea mays 1                     | : | M--   | AAAMTS        | ----           | FVA        | ----    | KNP-LL   | ----      | AAA--                          | ARRRALP              | PLAGRALP  | SP     | PLAS     | :     | 38   |    |    |
| Tagetes erecta                 | : | M--   | AAAIIV-PCSS   | RP-FGLG        | ----       | RMR-LL  | ----     | GHK--     | PTTITC                         | ----                 | HF        | PF     | SFSIK    | :     | 40   |    |    |
| Crocus sativus 1               | : | M--   | SAKISP-SATT   | LA-ASFR        | ----       | RPP     | ----     | ----      | ----                           | ----                 | SGARI     | ILLSS  | LPV      | :     | 33   |    |    |
| Crocus sativus 2               | : | M--   | TASISP-AATT   | LA-ASSR        | ----       | RPP     | ----     | ----      | ----                           | ----                 | AGARVIL   | SP     | PLSV     | :     | 33   |    |    |
| Narcissus pseudonarcissus      | : | M--   | AVWISA-APPA   | ----           | LAIS       | ----    | SAP      | ----      | ----                           | ----                 | RIRRVIL   | SP     | PLHS     | :     | 31   |    |    |
| Daucus carota 2                | : | M--   | ARLSV-GL      | ----           | FRVG       | ----    | KYE-IQ   | ----      | VPK--                          | QMTVV                | KTI       | ----   | RELSAP   | FIG   | :    | 38 |    |
| Ricinus communis 2             | : | M--   | ATAISA-TSSS   | LR-HRFG        | ----       | QVS-FP  | ----     | TPK--     | SNNSTTIH                       | ----                 | TLVYG     | ----   |          | :     | 38   |    |    |
| Oncidium Gower Ramsay          | : | M--   | AFAMSS-SLTL   | FQYQSF         | ----       | KKP-FF  | ----     | SRR--     | RDFAG                          | -----                | CSM       | NP     | ----     | :     | 38   |    |    |
| Picea sitchensis 1             | : | M     | MEMSGVSS      | ----           | SCGLSR     | CDSILSP | ----     | LPALIKPAA | ----                           | APLGRAVYRYDLAFARASSV |           |        | :        | 51    |      |    |    |
| Picea sitchensis 2             | : | M     | ----          | RSA            | ----       | PCGLSL  | CDSILSP  | ----      | LLALTKPVALPPAGRAVSRYYVAFAGASTV |                      |           |        | :        | 47    |      |    |    |
| Pinus taeda 1                  | : | M     | GLRSVSS       | ----           | PYGLSK     | CGSILSP | ----     | PLSSTKPAA | ----                           | APLGRAVYCYYLALAFASV  |           |        | :        | 50    |      |    |    |
| Pinus taeda 2                  | : | M     | NSNLPA-SSSK   | VPNQ           | TAVKLFMSRP | ----    | SPR--    | REILG     | ----                           | LGL                  | ENIGTAP   | ----   |          | :     | 43   |    |    |
| Muriella zofingiensis          | : | M     | QTVFQPSS      | ----           | VVHL       | ----    | RNRHVL   | ----      | GDR                            | -----                | TCV       | PCR    | ----     | :     | 28   |    |    |
| Haematococcus pluvialis        | : | M     | LSKLQ         | SIVKA          | ----       | RRVELA  | ----     | ----      | ----                           | ----                 | ----      | ----   |          | :     | 18   |    |    |
| Chlamydomonas reinhardtii      | : | M     | LSRPAV        | ----           | ALGA       | ----    | RAQPQV   | ----      | LRP                            | -----                | TLVPR     | PGMV   | :        | 31    |      |    |    |

|                                | * | 80                                                            | * | 100 | * | 120 |  |
|--------------------------------|---|---------------------------------------------------------------|---|-----|---|-----|--|
| <b>Adonis aestivalis</b> CBFD2 | : | M-----SPM-----RKKKKHGDPICISVAGR--TRN---LDIPQI---EEEE--NV      | : | 76  |   |     |  |
| <b>Adonis aestivalis</b> CBFD1 | : | E-----SPM-----RKKKTHRAACISVAER--TRN---LDIPQI---EEEE--NE       | : | 73  |   |     |  |
| Brassica rapa 1                | : | -----L-----RF-RGFSVCYVVEE--QRQ--SS--PV---DNDR---PE            | : | 66  |   |     |  |
| Brassica rapa 2                | : | -----LL-----RF-RGLSVCYVSD--RRQ--SS--PI---NNDSE---PE           | : | 67  |   |     |  |
| Arabidopsis thaliana 1         | : | -----L-----RF-KRFSVCYVVEE--RRQ--NS--PI---ENDR---PE            | : | 67  |   |     |  |
| Arabidopsis thaliana 2         | : | FN-----GFRRR-KILTVCFVVEE--RKQ--SS--PM---DDNK---PE             | : | 68  |   |     |  |
| Glycine max 2                  | : | FH-----HSTILRV-RPRRRMSGFTVCVLTED--SKE---IK--TV---EQEQE-----   | : | 75  |   |     |  |
| Medicago truncatula            | : | FP-----HSKILETQRTRKS-TCFTVCVLTED--PKH---TS--QL---KTEEE-----   | : | 76  |   |     |  |
| Glycine max 1                  | : | FH-----HTASP---IPQNF-STFTVCVLMQD--PKQ---GT--QM---EIQAQ---EP   | : | 74  |   |     |  |
| Populus trichocarpa 1          | : | HQSF----LHYGT---KVPRK-TSLAVCFVVED--QTK---PSSAHI---ENQE---EV   | : | 79  |   |     |  |
| Populus trichocarpa 2          | : | HQNL----LHYGF---RHRK-TSFAVCFVVED--QTK---PISAHL---ENQE---EE    | : | 79  |   |     |  |
| Ricinus communis 1             | : | Y-----NSLFL---GGRRK-TGFAICFVLED--LKQ---SV--ET---ENPVE---EE    | : | 73  |   |     |  |
| Citrus unshiu                  | : | R-----HGFFNG-KNRRKINSFTVCFVLEE--KKQ---ST--QI---ETFTE---EE     | : | 78  |   |     |  |
| Diospyros kaki                 | : | P-----FGAVL---RSGSR-TAKTVCFVVEE--EEL---AA--QL---EAGDQ---DE    | : | 80  |   |     |  |
| Vitis vinifera 2               | : | R-----HENIF---RCRCK-PRLTVCFVVEE--EKL---ST--EVV---ENRSE-----   | : | 73  |   |     |  |
| Ipomea nil                     | : | RF-----RSSVL---RSRCK-PSLTVCFVLED--EKL---ES--GGV---EIRAE---EI  | : | 79  |   |     |  |
| Solanum lycopersicum 1         | : | N-----FGAIL---LSRRK-PRLAVCFVLEN--EKL---NS--TI---ESES---VI     | : | 77  |   |     |  |
| Capsicum annuum 1              | : | N-----LDAIL---RSRCK-PRLAFCVFLKD--DKLYTAQS-GKQSDTEAIGD---EI    | : | 84  |   |     |  |
| Coffea arabica                 | : | Q-----FSTTR---RHRK-PRLTVCFVLED--EEL---KA--QLVTSEEAR---ER      | : | 80  |   |     |  |
| Solanum lycopersicum 2         | : | N-----LGPIL---RSRCK-PSFTVCFVLED--EKL---KP--QF---DDEAE---DF    | : | 79  |   |     |  |
| Capsicum annuum 2              | : | N-----LGSIL---RCRRR-PSFTVCFVLED--DKF---KT--QF---EAGEE---DI    | : | 78  |   |     |  |
| Vitis vinifera 1               | : | L-----KGNIF---PLQRR-RSLKVLVLEK--EIE---DG--IEI---EDDSP-----    | : | 76  |   |     |  |
| Gentiana lutea                 | : | L-----VSKSL---RTRCK-PRLTVCFVLEE--KEL---KG--KLVVASDDDDGAGEV    | : | 89  |   |     |  |
| <b>Adonis aestivalis</b> CHYb  | : | -----RNRNGAGALTI CFVAER--TRG---REIPQI---EEDK---NM             | : | 74  |   |     |  |
| Daucus carota 1                | : | K-----LNPSL---RFKQK-SLTTVCFVVEP--RND---SS--GKP---ENNAD---RD   | : | 72  |   |     |  |
| Zea mays 2                     | : | RA-----PRPALP--PGAHAGPRPPVLAAPP--AAS---AA--PRRAVPARAA---PE    | : | 60  |   |     |  |
| Sorghum bicolor 1              | : | RR-----PRQAL---PPAHAGPR-----                                  | : | 35  |   |     |  |
| Oryza sativa japonica 1        | : | RR-----L-----AV--PLRVAVGEPE---PE                              | : | 56  |   |     |  |
| Oryza sativa japonica 3        | : | PR-----LRPIV---AGRRV-----AA--PTRAVLGDGAGVGGE                  | : | 56  |   |     |  |
| Elaeis oleifera                | : | NRCLRPSSISSALQ--PLRRPSRSAAVCFVVGQ--NRS---SE--MKE---AVEIE---SS | : | 86  |   |     |  |
| Zea mays 3                     | : | AR-----APRRRGLGTVTCFVPQD--TEH---PA--AA--PAPVA---PV            | : | 77  |   |     |  |
| Sorghum bicolor 2              | : | TR-----AARRRGLGTVTCFVPPD--TEHPAARA-PAA---PVPV---PV            | : | 81  |   |     |  |
| Oryza sativa japonica 2        | : | TR-----TPRSRGLGTVTCFVPQD--TESQQAPA--PS---PPPTV---PV           | : | 78  |   |     |  |
| Zea mays 1                     | : | TR-----APRR---TVTFCFVPQD--TAA---PA-----A                      | : | 59  |   |     |  |
| Tagetes erecta                 | : | S-----FTPIV---RGRR---CTVCFVAGG--DSN---SN--SNN---NSDSN---SN    | : | 74  |   |     |  |
| Crocus sativus 1               | : | RRPVERRIRPPLL---HRRR-RTATVFFVLAE--EKT---TP--FL---DDVEE-----   | : | 73  |   |     |  |
| Crocus sativus 2               | : | RRVVD--LWPSALGQ--RRRRR-RTGTVFFVLAE--EAE-----                  | : | 65  |   |     |  |
| Narcissus pseudonarcissus      | : | RQIG---WPPI---RNRKRKSKSTVFFASDV--DVG---KS--NGG---DGIVD---KI   | : | 71  |   |     |  |
| Daucus carota 2                | : | L-----RLGNK-RKLSLCAFAVEE--NESPVAAA--EA---EESSR---EV           | : | 72  |   |     |  |
| Ricinus communis 2             | : | -----TKGF---SLRKN-QHLSICLVMDK--KAE-----EF---LDVMD---KH        | : | 70  |   |     |  |
| Oncidium Gower Ramsay          | : | -----VARCN-RATEICCVVRK--DGE---AE--SLV---EAEND---QL            | : | 69  |   |     |  |
| Picea sitchensis 1             | : | NRNGHR--SVRVFSEFRGGR--KVLPLFFALTE--KSQ---QQ-----ETESE---SI    | : | 92  |   |     |  |
| Picea sitchensis 2             | : | NRNGLR--SVRVFSEFHGRR--KVLPLCFALRE--KAQ---QQ-----ETESE---SI    | : | 88  |   |     |  |
| Pinus taeda 1                  | : | NRNGFR--SARVFSEFRGRR--KVLSLVFASTE--KSQ---QL-----ETKSE---SI    | : | 91  |   |     |  |
| Pinus taeda 2                  | : | -----ATYRL-ARLALCKMRMK--ETS-----PQT---EAEKE---II              | : | 72  |   |     |  |
| Muriella zofingiensis          | : | -----TSLSTCRHAVR--LVRANVAE-TQA---TPTTS---QM                   | : | 57  |   |     |  |
| Haematococcus pluvialis        | : | -----RDITRPKVCLHAQRCSLVRLRVAA-PQT---EALG---TV                 | : | 52  |   |     |  |
| Chlamydomonas reinhardtii      | : | SN-----LR--LQPVKQAD-PIV---ASETS---QV                          | : | 53  |   |     |  |

|                                | * | 140                             | *                                                   | 160    | *           | 180        |                  |
|--------------------------------|---|---------------------------------|-----------------------------------------------------|--------|-------------|------------|------------------|
| <b>Adonis aestivalis</b> CBFD2 | : | EELIE-----                      | QTDSDIVHIKK-----                                    | TLGGR  | QSKRPT      | GSIVAPV    | SLGILS : 117     |
| <b>Adonis aestivalis</b> CBFD1 | : | EELIE-----                      | QTDSGIHIKK-----                                     | TLGGR  | QSRRT       | GSIVAPV    | SLGILS : 114     |
| Brassica rapa 1                | : | R-----                          | TNVIDPELLALRLAE-----                                | KLERRK | SERFTYLI    | AAVMSSFG   | GITS : 107       |
| Brassica rapa 2                | : | KTSSL-----                      | DTNAIDAEYLALRLAE-----                               | KLERRK | SERFTYLI    | AAVMSSFG   | GITS : 113       |
| Arabidopsis thaliana 1         | : | STSS-----                       | TNAIDAEYLALRLAE-----                                | KLERRK | SERSTYLI    | AAVMSSFG   | GITS : 111       |
| Arabidopsis thaliana 2         | : | STTSS-----                      | SEILMTRSRLK-----                                    | KAERK  | KSERFTYLI   | AAVMSSFG   | GITS : 109       |
| Glycine max 2                  | : | -----                           | QVIPQAVSAGVAE-----                                  | KLARKK | SQRF        | TYLVA      | AAVMSSFG : 113   |
| Medicago truncatula            | : | -----                           | IVAQ-----                                           | KLARKK | SQRF        | TYLVA      | AAVMSSFG : 105   |
| Glycine max 1                  | : | PPSP-----                       | PQQVLSQKLAE-----                                    | KLARKK | ESEF        | TYLVA      | AAVMSSFG : 114   |
| Populus trichocarpa 1          | : | PKDVN-----                      | ENQISTPRVAE-----                                    | RLERKR | KRERV       | TYLVA      | AAVMSSFG : 120   |
| Populus trichocarpa 2          | : | PKDVN-----                      | AKRILTPRVAE-----                                    | RLARK  | QRERD       | TYLVA      | AAVMSSFG : 120   |
| Ricinus communis 1             | : | NEKV-----                       | NYQILTPRVAE-----                                    | RLARK  | RSEFTYLV    | AAVMSSFG   | GITS : 113       |
| Citrus unshiu                  | : | EEESG-----                      | TQISTAARVAE-----                                    | KLARK  | RSEFTYLV    | AAVMSSFG   | GITS : 119       |
| Diospyros kaki                 | : | TSGV-----                       | ETDKRISAARVE-----                                   | KLARK  | RSEFTYLV    | AAVMSSFG   | GITS : 122       |
| Vitis vinifera 2               | : | -ETV-----                       | ASQISAARVAE-----                                    | KLARK  | RSEFTYLV    | AAVMSSFG   | GITS : 112       |
| Ipomea nil                     | : | ERAI-----                       | EKQISASRLAE-----                                    | KLARK  | RSEFTYLV    | AAVMSSFG   | GITS : 119       |
| Solanum lycopersicum 1         | : | EDRIQ-----                      | VEINEEKS LAASWLAE-----                              | KLARK  | KSERFTYLV   | AAVMSSFG   | GITS : 123       |
| Capsicum annuum 1              | : | EVETN-----                      | EEKSLAVRLAE-----                                    | KFARK  | KSERFTYLV   | AAVMSSFG   | GITS : 125       |
| Coffea arabica                 | : | EKAM-----                       | AKRISDAARVAE-----                                   | KLARK  | RSEFTYLV    | AAVMSSFG   | GITS : 120       |
| Solanum lycopersicum 2         | : | EKKI-----                       | EEQILATRLAE-----                                    | KLARK  | KSERFTYLV   | AAVMSSFG   | GITS : 119       |
| Capsicum annuum 2              | : | EMKI-----                       | EEQISATRLAE-----                                    | KLARK  | KSERFTYLV   | AAVMSSFG   | GITS : 118       |
| Vitis vinifera 1               | : | -----                           | ESSNRASAE-----                                      | RLARK  | KAERY       | TYLVA      | AAVMSSFG : 109   |
| Gentiana lutea                 | : | RKQR-----                       | EKEISASAELAQ-----                                   | KLARK  | KSERFTYLV   | AAVMSSFG   | GITS : 131       |
| <b>Adonis aestivalis</b> CHYb  | : | DEVFE-----                      | QMNSASVRVAE-----                                    | KLARK  | KSERFTYLI   | AAVMSSFG   | GITS : 115       |
| Daucus carota 1                | : | EVSR-----                       | EIEAGSCSVRVAE-----                                  | RRARK  | KSERFTYLV   | AAVMSSFG   | GITS : 115       |
| Zea mays 2                     | : | DGGRG-----                      | DAAAAA-----                                         | RAARK  | QSER        | TYLVA      | AAVMSSFG : 97    |
| Sorghum bicolor 1              | : | DRGDT-----                      | EAEAARVAE-----                                      | RAARK  | QSER        | TYLVA      | AAVMSSFG : 76    |
| Oryza sativa japonica 1        | : | ED-----                         | ARRAVA-----                                         | RAARK  | QSER        | TYLVA      | AAVMSSFG : 90    |
| Oryza sativa japonica 3        | : | EDAV-----                       | VAVVEEDAVAR-----                                    | RAARK  | RSEFTYLV    | AAVMSSFG   | GITS : 96        |
| Elaeis oleifera                | : | DPAAE-----                      | EEEARRILLDRTA-----                                  | KIARK  | QAERTYLA    | AAVLSL     | SGITS : 130      |
| Zea mays 3                     | : | PETAL-----                      | DEEARAAAARRVAE-----                                 | RKARK  | RSEFTYLV    | AAVMSSFG   | GITS : 121       |
| Sorghum bicolor 2              | : | PETAL-----                      | DEEARAAAARRIA-----                                  | KKARK  | RSEFTYLV    | AAVMSSFG   | GITS : 125       |
| Oryza sativa japonica 2        | : | PVPSL-----                      | EEEEAAAAARRIA-----                                  | RKARK  | LSEFTYLV    | AAVMSSFG   | GITS : 122       |
| Zea mays 1                     | : | PVPAL-----                      | DEEARAAAARRVAE-----                                 | KEARK  | RSEFTYLV    | AAVMSSFG   | GITS : 103       |
| Tagetes erecta                 | : | NPGLD-----                      | LNPVMMNRNRLVE-----                                  | KMERK  | KSERFTYLV   | AAVMSSFG   | GITS : 118       |
| Crocus sativus 1               | : | -----                           | EKSIAPSNRAAE-----                                   | RSARK  | RSEFTYLI    | AAVMSSFG   | GITS : 110       |
| Crocus sativus 2               | : | -----                           | KRMAPSNRAAE-----                                    | RSARK  | RSEFTYLI    | AAVMSSFG   | GITS : 101       |
| Narcissus pseudonarcissus      | : | ERLK-----                       | KQEQLMISKSRTE-----                                  | RMERK  | RSEFTYLI    | AAVMSSFG   | GITS : 114       |
| Daucus carota 2                | : | EKQI-----                       | IESFTVAGGSRAE-----                                  | RMARK  | KTERFTYLV   | AAVMSSFG   | GITS : 115       |
| Ricinus communis 2             | : | ENDVN-----                      | KKQPLNSRVER-----                                    | KLARK  | KLERFTYLV   | AAVMSSFG   | GITS : 111       |
| Oncidium Gower Ramsay          | : | EEVVM-----                      | KPTSIDSFSVVL-----                                   | RSERK  | KAERTYLV    | AAVMSSFG   | GITS : 111       |
| Picea sitchensis 1             | : | EDDDS-----                      | TVTEFADSLSSRVDEENENKMQWDKRAARRKAERHAYFFAAVASSVGGITS |        |             |            |                  |
| Picea sitchensis 2             | : | EEDS-----                       | VTEFADSLSSRVDEENENKMQWDKRAARRKAERHAYFFAAVASSVGGITS  |        |             |            |                  |
| Pinus taeda 1                  | : | EDDVS-----                      | ATKFADSLSSRVDEENENKMQWDKRAARRKAERHAYFFAAVASSVGGITS  |        |             |            |                  |
| Pinus taeda 2                  | : | DEPLQ-----                      | SKLASELMKRDENLRKVS-----                             | QRV    | KAERYAYLFAA | IASSVGGITS | : 121            |
| Muriella zofingiensis          | : | LEEVDHESHAASASSQIFELAVKTSI----- |                                                     | KRQQR  | NRQQLTYQGS  | FAAASL     | GVGA : 108       |
| Haematococcus pluvialis        | : | QAAGAGDEH--                     | SADVALQQLDRATA-----                                 | RRAR   | RKRQLSYQA   | AAIAASL    | ICVSG : 101      |
| Chlamydomonas reinhardtii      | : | MEA-----                        | PQEKLSSEFELKRLAE-----                               | RKQQR  | AEAA        | TYKFS      | FAAATVVLVLS : 96 |

|                                | * | 200            | *                                             | 220                                       | *       | 240 |     |
|--------------------------------|---|----------------|-----------------------------------------------|-------------------------------------------|---------|-----|-----|
| <b>Adonis aestivalis</b> CBFD2 | : | MIGPAVYFKF     | SRLME                                         | --GGDIPVAEMGITFATFVAAAVGTEFLSAWVHKELWH    | --ES-LW | :   | 172 |
| <b>Adonis aestivalis</b> CBFD1 | : | MIGPAVYFKF     | SRLME                                         | --GGDIPVAEMGITFAAFVAAAICTEFLSCWVHKELWH    | --DS-LW | :   | 169 |
| Brassica rapa 1                | : | MAVMAVYYRF     | SWQME                                         | --GGEVPMSEMFGTFFALSFGAAVGMFWARWAHRALWH    | --AS-LW | :   | 162 |
| Brassica rapa 2                | : | MAIMAVYYRF     | SWQME                                         | --GGEIPMSEMFGTFFALSFGAAVGMFWARWAHRALWH    | --AS-LW | :   | 168 |
| Arabidopsis thaliana 1         | : | MAVMAVYYRF     | SWQME                                         | --GGEISMLEMFGTFFALSFGAAVGMFWARWAHRALWH    | --AS-LW | :   | 166 |
| Arabidopsis thaliana 2         | : | MAIMAVYYRF     | SWQMK                                         | --GGEVSVLEMFGTFFALSFGAAVGMFWARWAHRALWH    | --DS-LW | :   | 164 |
| Glycine max 2                  | : | MAVFAVYYRF     | SWQME                                         | --GGDVPWSEMLGTFSLSVGAAVGMFWARWAHRALWH     | --AS-LW | :   | 168 |
| Medicago truncatula            | : | MAILAVYYRF     | SWQME                                         | --GSEVWPSEMFGTFFALSFGAAVGMFWARWAHRALWH    | --AS-LW | :   | 161 |
| Glycine max 1                  | : | MAVFAVYYRF     | AWQME                                         | --GGEVPLSEMFGTFFALSFGAAVGMFWARWAHRALWH    | --AS-LW | :   | 169 |
| Populus trichocarpa 1          | : | MAVMAVYYRF     | YW-LLE                                        | --GGEVPLSEMFGTFFALSFGAAVGMFWARWAHRALWH    | --AS-LW | :   | 174 |
| Populus trichocarpa 2          | : | TAVLAVYYRF     | YW-LLE                                        | --GGEVSWPEMFGTFFALSFGAAVGMFWARWAHRALWH    | --AS-LW | :   | 174 |
| Ricinus communis 1             | : | MAVMAVYYRF     | YWQME                                         | --GGEVPLAEMFGTFFALSFGAAVGMFWARWAHRALWH    | --AS-LW | :   | 168 |
| Citrus unshiu                  | : | MAVMAVYYRF     | WWQME                                         | --GGEVPLAEMFGTFFALSFGAAVGMFWARWAHRALWH    | --AS-LW | :   | 174 |
| Diospyros kaki                 | : | MAVLAVYYRF     | SWQME                                         | --GGEIPYSEMFGTFFALSFGAAVGMFWARWAHRALWH    | --AS-LW | :   | 177 |
| Vitis vinifera 2               | : | MAVMAVYYRF     | SWQME                                         | --GGEVPLSEMFGTFFALSFGAAVGMFWARWAHRALWH    | --AS-LW | :   | 167 |
| Ipomea nil                     | : | MAVLAVYYRF     | AWQME                                         | --GGEVPTYEMFGTFFALSFGAAVGMFWARWAHRALWH    | --AS-LW | :   | 174 |
| Solanum lycopersicum 1         | : | MAILAVYYRF     | SWQME                                         | --GGEVPPSEMLATFSLFSGAAVGMFWARWAHRALWH     | --AS-LW | :   | 178 |
| Capsicum annuum 1              | : | MAVISVYYRF     | SWQME                                         | --GGEVPPSEMFGTFFALAFGAAVGMFWARWAHRALWH    | --AS-LW | :   | 180 |
| Coffea arabica                 | : | MAVLAVYYRF     | VWQME                                         | --GGEVPPSEMFGTFFALSFGAAVGMFWARWAHRALWH    | --AS-LW | :   | 175 |
| Solanum lycopersicum 2         | : | MAVMAVYYRF     | SWQME                                         | --GGEVPPVTEMLGTFALSFGAAVGMFWARWAHRALWH    | --AS-LW | :   | 174 |
| Capsicum annuum 2              | : | MAVMAVYYRF     | YWQME                                         | --GGEVPPSEMFGTFFALSFGAAVGMFWARWAHRALWH    | --AS-LW | :   | 173 |
| Vitis vinifera 1               | : | MAIVAVYYRF     | LSWQME                                        | --GGEIPVLEMLGTFALSFGAAVGMFWARWAHRALWH     | --AS-LW | :   | 164 |
| Gentiana lutea                 | : | MAVLSVYYRF     | SWQME                                         | --GGEIPLSEMFGTFFALSFGAAVGMFWARWAHRALWH    | --AS-LW | :   | 186 |
| <b>Adonis aestivalis</b> CHYb  | : | MAILSVYYRF     | SWQME                                         | --GGDIPVTEMLGTFALSFGAAVGMFWARWAHRALWH     | --AS-LW | :   | 170 |
| Daucus carota 1                | : | MAVLAVYYRF     | SWQME                                         | --GGEIPYSEMFGTFFALSFGAAVGMFWARWAHRALWH    | --AS-LW | :   | 170 |
| Zea mays 2                     | : | MAAAAVYYRF     | AWQME                                         | --GGCAIPVTEMFVGTFFALSFGAAVGMFWARWAHRALWH  | --AS-LW | :   | 153 |
| Sorghum bicolor 1              | : | MAAAAVYYRF     | AWQME                                         | --GGCAIPVTEMFVGTFFALSFGAAVGMFWARWAHRALWH  | --AS-LW | :   | 132 |
| Oryza sativa japonica 1        | : | MAAAAVYYRF     | AWQME                                         | --GSGEIPVTEMFGTFFALSFGAAVGMFWARWAHRALWH   | --AS-LW | :   | 146 |
| Oryza sativa japonica 3        | : | MAAAAVYYRF     | AWQME                                         | --AGGCDVPATEMFVGTFFALSFGAAVGMFWARWAHRALWH | --AS-LW | :   | 153 |
| Elaeis oleifera                | : | MAVAVYYRF      | YWQME                                         | --GGEVPLTEMLGTFALSFGAAVGMFWARWAHRALWH     | --AS-LW | :   | 185 |
| Zea mays 3                     | : | MAVAVYYRF      | SWQME                                         | --GGEVPPVSEMFGTFFALSFGAAVGMFWARWAHRALWH   | --AS-LW | :   | 176 |
| Sorghum bicolor 2              | : | MAVAVYSRF      | SWQME                                         | --GGEVPPVSEMLGTFALSFGAAVGMFWARWAHRALWH    | --AS-LW | :   | 180 |
| Oryza sativa japonica 2        | : | MAVAVYYRF      | HWQLLE                                        | --GGDVPMTSEMFGTFFALSFGAAVGMFWARWAHRALWH   | --AS-LW | :   | 177 |
| Zea mays 1                     | : | MAVAVYYRF      | SWQME                                         | --GGEVPPVTEMLGTFALSFGAAVGMFWARWAHRALWH    | --AS-LW | :   | 158 |
| Tagetes erecta                 | : | MAVMAVYYRF     | SWQME                                         | --GGEIPPYSEMFGTFFALSFGAAVGMFWARWAHRALWH   | --AS-LW | :   | 173 |
| Crocus sativus 1               | : | MAAAAVYYRF     | AWQME                                         | --GGDVPVTEMACTFFALSFGAAVGMFWARWAHRALWH    | --AS-LW | :   | 165 |
| Crocus sativus 2               | : | MAAAAVYYRF     | AWQME                                         | --GGDVPMTSEMACTFRLSVCGGPEDEFWRPHRASAT     | --RR-SW | :   | 156 |
| Narcissus pseudonarcissus      | : | MAIVSVYYRF     | AWQME                                         | --GGEIPVTEMLGTFALSFGAAVGMFWARWAHRALWH     | --AS-LW | :   | 169 |
| Daucus carota 2                | : | MAVFAVYSRF     | AWQME                                         | --GGEVPHSEMLATFSLAFGAAVGMFWARWAHRALWH     | --DS-LW | :   | 170 |
| Ricinus communis 2             | : | IAAMSVYYRF     | SWQME                                         | --GGEFPALSEMFGTFFALSFGAAVGMFWARWAHRALWH   | --AS-LW | :   | 166 |
| Oncidium Gower Ramsay          | : | MAAAAVYYRF     | AWQME                                         | --GCAVPLTEMMGTFSLAVGSAVGMFWARWAHRALWH     | --TS-LW | :   | 166 |
| Picea sitchensis 1             | : | MAAGAVYYRF     | VWQMQ                                         | --CAEVPPYSEMFGTFFALAVGATVGMFWARWAHRALWH   | --AS-LW | :   | 201 |
| Picea sitchensis 2             | : | MAAAAVYYRF     | VWLMQ                                         | --CAEVPPYSEMFGTFFALAVGATVGMFWARWAHRALWH   | --AS-LW | :   | 194 |
| Pinus taeda 1                  | : | MTAAVYYRF      | VWQMQ                                         | --CAQIPYSEMFGTFFALAVGATVGMFWARWAHRALWH    | --AS-LW | :   | 199 |
| Pinus taeda 2                  | : | MAAGAVYYRF     | VWQVQ                                         | --GGEVPLTEMFGTFFALAVGATVGMFWARWAHRALWH    | --SS-LW | :   | 176 |
| Muriella zofingiensis          | : | LAVATHYKFSYHMP | -SESPFPWLDMACTLALVIGVFGMEMWARYAHKALWHDFQP     | -GW                                       | :       | 166 |     |
| Haematococcus pluvialis        | : | IAIFATYLRFAHMT | -VGAAPWGVACTLLLVCGALGMEYARYAHKALWHDFQP        | -SPLGW                                    | :       | 159 |     |
| Chlamydomonas reinhardtii      | : | IAVVAITYYRF    | AHFFA-EDCDLPVDEMAAALLLVFGMFGMEYARYAHKALWHDFQP | -GW                                       | :       | 154 |     |



|                                | * | 260                  | *             | 280             | *         | 300         |                           |
|--------------------------------|---|----------------------|---------------|-----------------|-----------|-------------|---------------------------|
| <b>Adonis aestivalis</b> CBFD2 | : | YIHKSHHRSR-KGRFEF    | ---           | NDVFATINAVPAI   | ALIN      | YNGFSNEGL   | LPGACFGVGLGTTVC : 228     |
| <b>Adonis aestivalis</b> CBFD1 | : | YIHKSHHRSR-KGRFEF    | ---           | NDVFATINAVPAI   | ALIN      | YNGFSNEGL   | LPGACFGTGLGTTVC : 225     |
| Brassica rapa 1                | : | NMHESHKKPR-EGPFEL    | ---           | NDVFATINAVPAI   | GLLSYGF   | FNKGLVPGL   | CFGAGLGITVF : 218         |
| Brassica rapa 2                | : | NMHESHKKPR-EGPFEL    | ---           | NDVFATINAVPAI   | ALLSYGF   | FNKGLVPGL   | RFAGAGLGITVF : 224        |
| Arabidopsis thaliana 1         | : | NMHESHKKPR-EGPFEL    | ---           | NDVFATINAVPAI   | GLLSYGF   | FNKGLVPGL   | CFGAGLGITVF : 222         |
| Arabidopsis thaliana 2         | : | NMHESHKKPR-EGPFEL    | ---           | NDVFATINAVPAI   | GLLYYGF   | LNKGLVPGL   | CFGAGLGITVF : 220         |
| Glycine max 2                  | : | HMHESHHRPR-EGPFEL    | ---           | NDVFATINAVPAI   | ALLSYGL   | FHKGLVPGL   | CFGAGLGITVF : 224         |
| Medicago truncatula            | : | HMHESHHRPR-EGAFEL    | ---           | NDVFATINAVPAI   | ALLSNGF   | FNKGLRPG    | CFGAGLGITVF : 217         |
| Glycine max 1                  | : | HMHESHHRPR-EGPFEL    | ---           | NDVFATINAVPAI   | ALLSYGF   | FNKGLVPGL   | CFGAGLGITVF : 225         |
| Populus trichocarpa 1          | : | HMHESHHRPR-EGPFEL    | ---           | NDVFATINAVPAI   | SLLSYGF   | FNKGLVPGL   | CFGAGLGITVF : 230         |
| Populus trichocarpa 2          | : | NMHESHHRPR-DGPFEL    | ---           | NDVFATINAVPAI   | SLVAYGF   | FNEGLVPGL   | CFGAGLGITVF : 230         |
| Ricinus communis 1             | : | HMHESHHRPR-EGPFEL    | ---           | NDVFATINAVPAI   | GLLYYGF   | FNKGLFPGL   | CFGAGLGITVF : 224         |
| Citrus unshiu                  | : | HMHESHHRPR-EGPFEL    | ---           | NDVFATINAVPAI   | ALLSFGF   | FHKGLVPGL   | CFGAGLGITVF : 230         |
| Diospyros kaki                 | : | HMHESHKKPR-EGPFEL    | ---           | NDVFATINAVPAI   | ALLSYGF   | FHKGLVPGL   | CFGAGLGITVF : 233         |
| Vitis vinifera 2               | : | HMHESHHRPR-EGPFEL    | ---           | NDVFATINAVPAI   | ALLSYGF   | FHKGLVPGL   | CFGAGLGITVF : 223         |
| Ipomea nil                     | : | HMHESHHRPR-EGPFEL    | ---           | NDVFATINAVPAI   | ALLSYGF   | FHKGLVPGL   | CFGAGLGITVF : 230         |
| Solanum lycopersicum 1         | : | HMHESHHRPR-EGPFEM    | ---           | NDVFATINAVPAI   | GLLSYGF   | FHKGLVPGL   | CFGAGLGITVF : 234         |
| Capsicum annuum 1              | : | HMHESHHRPR-EGPFEL    | ---           | NDIFATINAVPAI   | AFSFGF    | NHKGLIPGL   | CFGAGLGITVF : 236         |
| Coffea arabica                 | : | HMHESHHRPR-EGPFEL    | ---           | NDVFATINAVPAI   | ALLSYGF   | FHKGLIPGL   | CFGAGLGITVF : 231         |
| Solanum lycopersicum 2         | : | HMHESHKKPR-EGPFEL    | ---           | NDVFATINAVPAI   | ALLNYGF   | FHKGLIAGL   | CFGAGLGITVF : 230         |
| Capsicum annuum 2              | : | HMHESHKKPR-EGPFEL    | ---           | NDVFATINAVPAI   | ALLDYGF   | FHKGLIPGL   | CFGAGLGITVF : 229         |
| Vitis vinifera 1               | : | HMHESHHRPR-EGPFEL    | ---           | NDVFATINAVPAI   | SLLSYGL   | FNKGLVPGL   | CFGAGLGITVF : 220         |
| Gentiana lutea                 | : | HMHESHKKPR-EGPFEL    | ---           | NDIFATINAVPAI   | ALLSYGF   | FHKGLIPGL   | CFGAGLGITVF : 242         |
| <b>Adonis aestivalis</b> CHYb  | : | HMHESHKKPR-EGPFEL    | ---           | NDVFATINAVPAI   | ALLNFGF   | FHKGLIPGL   | CFGAGLGITVF : 226         |
| Daucus carota 1                | : | HMHESHKKPR-EGAFEL    | ---           | NDVFATINAVPAI   | ALLLAYGF  | FHKGLYFPG   | CFGAGLGITVF : 226         |
| Zea mays 2                     | : | HMHESHHRARDDGPFEL    | ---           | NDVFATINAVPAMS  | LLAYGF    | FNRGLVPGL   | CFGAGLGITLF : 210         |
| Sorghum bicolor 1              | : | HMHESHHRPR-DGPFEL    | ---           | NDVFATINAVPAMS  | LLAYGF    | FNRGLVPGL   | CFGAGLGITLF : 188         |
| Oryza sativa japonica 1        | : | HMHESHHRPR-DGPFEL    | ---           | NDVFATINAVPAMS  | LLAYGF    | FTRGLVPGL   | CFGAGLGITLF : 202         |
| Oryza sativa japonica 3        | : | HMHESHHRPR-DGPFEL    | ---           | NDVFATINAVPAMS  | LLAYGL    | LLNRGLLPGL  | CFGAGLGITLF : 209         |
| Elaeis oleifera                | : | HMHESHHRPR-DGPFEL    | ---           | NDVFATINAVPAIS  | LLSFGF    | FNRGLVPGL   | CFGAGLGITLF : 241         |
| Zea mays 3                     | : | HMHESHHRPR-EGPFEL    | ---           | NDVFATINAVPAIS  | LLAYGF    | FHRGLVPGL   | CFGAGLGITLF : 232         |
| Sorghum bicolor 2              | : | HMHESHHRPR-EGPFEL    | ---           | NDVFATINAVPAIC  | LLAYGF    | FHRGLVPGL   | CFGAGLGITLF : 236         |
| Oryza sativa japonica 2        | : | HMHESHHRAR-EGPFEL    | ---           | NDVFATINAVPAIS  | LLAYGF    | FHRGLVPGL   | CFGAGLGITLF : 233         |
| Zea mays 1                     | : | HMHESHHRPR-EGPFEL    | ---           | NDVFATINAVPAIS  | LLAYGF    | FHRGLVPGL   | CFGAGLGITLF : 214         |
| Tagetes erecta                 | : | HMHESHKKPR-EGPFEL    | ---           | NDVFATINAVPAI   | ALLSYGF   | FHKGLIPGL   | CFGAGLGITVF : 229         |
| Crocus sativus 1               | : | HMHESHHRPR-EGPFEL    | ---           | NDVFATINAVPAI   | ALLNFGF   | FHRGLLPGL   | CFGAGLGITLF : 221         |
| Crocus sativus 2               | : | HMHESHHPPA-ECKGELSSS | NDVFATINAVPAI | ALLAFGF         | FHRGLLPGL | CFGAGLGITLF | : 214                     |
| Narcissus pseudonarcissus      | : | HMHESHKKPR-DGPFEL    | ---           | NDVFATINAVPAIS  | LLYYGF    | FNRGLVPGL   | CFGAGLGITLY : 225         |
| Daucus carota 2                | : | HMHESHKKPR-EGAFEL    | ---           | NDVFATINAVPAI   | ALLAYGF   | FHKGLFPGL   | CFGAGLGITVF : 226         |
| Ricinus communis 2             | : | KMHESHKSR-EGPFEL     | ---           | NDVFATINAVPAI   | ALLSYGF   | NNKGLLPGL   | CFGAGLGITVF : 222         |
| Oncidium Gower Ramsay          | : | HMHESHHRPR-DGPFEL    | ---           | NDVFATINAVPAI   | ALLAFGF   | FHRGF       | FFSGLCFGAGLGITLY : 222    |
| Picea sitchensis 1             | : | HMHESHHRPR-EGPFEL    | ---           | NDVFATINAVPAI   | ALLMAYGF  | FNKGFVPGL   | CFGAGLGITVF : 257         |
| Picea sitchensis 2             | : | HMHESHHRPR-EGPFEL    | ---           | NDVFATINAVPAI   | ALLAYGF   | FNKGLVPGL   | CFGAGLGITVF : 250         |
| Pinus taeda 1                  | : | HMHESHHRPR-EGPFEL    | ---           | NDVFATINAVPAI   | ALLMAYGF  | FNKGFVPGL   | CFGAGLGITVF : 255         |
| Pinus taeda 2                  | : | SMHESHHRTR-EGPFEL    | ---           | NDVFATINAVPAIS  | LLSYGF    | FNKGFVPGL   | CFGAGLGITVF : 232         |
| Muriella zofingiensis          | : | ALHKSHHEPR-IGPFEA    | ---           | NDIFATINAVPAFS  | CLYGL     | LTPNLVGSL   | CFGAGLGITLF : 222         |
| Haematococcus pluvialis        | : | LLHKSHHTPR-TGPFEA    | ---           | NDLFAITINGLPAML | CTFGF     | WLPNVLGAA   | CFGAGLGITLY : 215         |
| Chlamydomonas reinhardtii      | : | ALHKSHHEPR-TGPFEL    | ---           | NDIYAVANALPAMA  | L         | CAYGF       | FTPHVIGVCFGAGLGITLF : 210 |

|                                | * | 320                  | *                                        | 340                     | * | 360 |     |
|--------------------------------|---|----------------------|------------------------------------------|-------------------------|---|-----|-----|
| <b>Adonis aestivalis</b> CBFD2 | : | GMAYIFLHNGLSHRRFPVW  | IANVPIFHKLAAAHQ                          | IHHSGKFQGVVFGFLGPKLEEEV | : |     | 288 |
| <b>Adonis aestivalis</b> CBFD1 | : | GMAYIFLHNGLSHRRFPVGL | IANVPIFHKLAAAHQ                          | IHHSGKFQGVVFGFLGPKLEEEV | : |     | 285 |
| Brassica rapa 1                | : | GIAYMFVHDGLVHKRFPVGP | IADVPYLRKVAAAHQLHHTDKFDGVPYGLFLGPKLEEEV  | :                       |   |     | 277 |
| Brassica rapa 2                | : | GIAYMFVHDGLVHKRFPVGP | IADVPYLRKVAAAHQLHHTDKFDGVPYGLFLGPKLEEEV  | :                       |   |     | 283 |
| Arabidopsis thaliana 1         | : | GIAYMFVHDGLVHKRFPVGP | IADVPYLRKVAAAHQLHHTDKFDGVPYGLFLGPKLEEEV  | :                       |   |     | 281 |
| Arabidopsis thaliana 2         | : | GMAYMFVHDGLVHKRFPVGP | IANVPIFHKLAAAHQ                          | IHHSGKFQGVVFGFLGPKLEEEV | : |     | 279 |
| Glycine max 2                  | : | GMAYMFVHDGLVHKRFPVGP | IANVPIFRRVAAAHQLHHSDFKFGAPYGLFLGPKLEEEV  | :                       |   |     | 283 |
| Medicago truncatula            | : | GIAYMFVHDGLVHKRFPVGP | IANVPIFTRVGAHQLPHWDKFKGVPYGLFLGPKLEEEV   | :                       |   |     | 276 |
| Glycine max 1                  | : | GMAYMFVHDGLVHKRFPVGP | IANVPIFRRVAAAHQLHHSDFKFDGVPYGLFMGPKLEEEV | :                       |   |     | 284 |
| Populus trichocarpa 1          | : | GIAYMFVHDGLVHKRFPVGP | IADVPYFRKVAAAHQLHHSDFKFGVPYGLFLGPKLEEEV  | :                       |   |     | 289 |
| Populus trichocarpa 2          | : | GMAYMFVHDGLVHKRFPVGP | IADVPYFTRVAAAHQLHHSDFKFGVPYGLFLGPKLEEEV  | :                       |   |     | 289 |
| Ricinus communis 1             | : | GMAYMFVHDGLVHKRFPVGP | IANVPIFRRVAAAHQLHHSDFKFGVPYGLFLGPKLEEEV  | :                       |   |     | 283 |
| Citrus unshiu                  | : | GMAYMFVHDGLVHKRFPVGP | IADVPYFRRVAAAHQLHHSDFKFGVPYGLFLGPKLEEEV  | :                       |   |     | 289 |
| Diospyros kaki                 | : | GMAYMFVHDGLVHKRFPVGP | IADVPYFRRVAAAHQLHHSDFKFGVPYGLFLGPKLEEEV  | :                       |   |     | 292 |
| Vitis vinifera 2               | : | GMAYMFVHDGLVHKRFPVGP | IANVPIFRRVAAAHQLHHSDFKFGVPYGLFLGPKLEEEV  | :                       |   |     | 282 |
| Ipomea nil                     | : | GMAYMFVHDGLVHKRFPVGP | IADVPYFRRVAAAHQLHHTDKFDGVPYGLFLGPKLEEEV  | :                       |   |     | 289 |
| Solanum lycopersicum 1         | : | GMAYMFVHDGLVHKRFPVGP | IANVPIFRRVAAAHQLHHSDFKFDGVPYGLFLGPKLEEEV | :                       |   |     | 293 |
| Capsicum annuum 1              | : | GMAYMFVHDGLVHKRFPVGP | IAKVPYFQRVAAAHQLHHSDFKFDGVPYGLFLGPKLEEEV | :                       |   |     | 295 |
| Coffea arabica                 | : | GMAYMFVHDGLVHKRFPVGP | IANVPIFRRVAAAHQLHHSDFKFGVPYGLFLGPKLEEEV  | :                       |   |     | 290 |
| Solanum lycopersicum 2         | : | GMAYMFVHDGLVHKRFPVGP | IANVPIFRRVAAAHQLHHSDFKFGVPYGLFLGPKLEEEV  | :                       |   |     | 289 |
| Capsicum annuum 2              | : | GMAYMFVHDGLVHKRFPVGP | IANVPIFRRVAAAHQLHHSDFKFGVPYGLFLGPKLEEEV  | :                       |   |     | 288 |
| Vitis vinifera 1               | : | GMAYMFVHDGLVHRRFPVGP | IANVPIFRRVAAAHQLHHSDFKFGVPYGLFLGPKLEEEV  | :                       |   |     | 279 |
| Gentiana lutea                 | : | GMAYMFVHDGLVHRRFPVGP | IANVPIFRRVAAAHQLHHSDFKFGVPYGLFLGPKLEEEV  | :                       |   |     | 301 |
| <b>Adonis aestivalis</b> CHYb  | : | GMAYMFVHDGLVHRRFPVGP | IANVPIFRRVAAAHQLHHTDKFDGVPYGLFLGPKLEEEV  | :                       |   |     | 285 |
| Daucus carota 1                | : | GIAYMFVHDGLVHKRFPVGP | IADVPYFRKVAAAHQLHHTDKFDGVPYGLFLGPKLEEEV  | :                       |   |     | 285 |
| Zea mays 2                     | : | GMAYMFVHDGLVHRRFPVGP | IENVPYFRRVAAAHQLHHTDKFDGVPYGLFLGPKLEEEV  | :                       |   |     | 269 |
| Sorghum bicolor 1              | : | GMAYMFVHDGLVHRRFPVGP | IENVPYFRRVAAAHQLHHTDKFDGVPYGLFLGPKLEEEV  | :                       |   |     | 247 |
| Oryza sativa japonica 1        | : | GMAYMFVHDGLVHRRFPVGP | IANVPIFRRVAAAHQLHHTDKFDGVPYGLFLGPKLEEEV  | :                       |   |     | 261 |
| Oryza sativa japonica 3        | : | GMAYMFVHDGLVHRRFPVGP | IENVPYFRRVAAAHQLHHTDKFDGVPYGLFLGPKLEEEV  | :                       |   |     | 268 |
| Elaeis oleifera                | : | GMAYMFVHDGLVHRRFPVGP | IANVPIFRRVAAAHQLHHTDKFDGVPYGLFLGPKLEEEV  | :                       |   |     | 300 |
| Zea mays 3                     | : | GMAYMFVHDGLVHRRFPVGP | IANVPIFRRVAAAHQLHHTDKFDGVPYGLFLGPKLEEEV  | :                       |   |     | 291 |
| Sorghum bicolor 2              | : | GMAYMFVHDGLVHRRFPVGP | IANVPIFRRVAAAHQLHHTDKFDGVPYGLFLGPKLEEEV  | :                       |   |     | 295 |
| Oryza sativa japonica 2        | : | GMAYMFVHDGLVHRRFPVGP | IANVPIFRRVAAAHQLHHTDKFDGVPYGLFLGPKLEEEV  | :                       |   |     | 292 |
| Zea mays 1                     | : | GMAYMFVHDGLVHRRFPVGP | IADVPYFRRVAAAHQLHHTDKFDGVPYGLFLGPKLEEEV  | :                       |   |     | 273 |
| Tagetes erecta                 | : | GMAYMFVHDGLVHRRFPVGP | IANVPIFRRVAAAHQLHHTDKFDGVPYGLFLGPKLEEEV  | :                       |   |     | 288 |
| Crocus sativus 1               | : | GIAYMFVHDGLVHRRFPVGP | IADVPYFRRVAAAHQLHHTDKFDGVPYGLFLGPKLEEEV  | :                       |   |     | 280 |
| Crocus sativus 2               | : | GIAYMFVHDGLVHRRFPVGP | IADVPYFRRVAAAHQLHHTDKFDGVPYGLFLGPKLEEEV  | :                       |   |     | 273 |
| Narcissus pseudonarcissus      | : | GMAYMFVHDGLVHRRFPVGP | IADVPYFRRVAAAHQLHHTDKFDGVPYGLFLGPKLEEEV  | :                       |   |     | 284 |
| Daucus carota 2                | : | GMAYMFVHDGLVHKRFPVGP | IANVPIFRRVAAAHQLHHTDKFDGVPYGLFLGPKLEEEV  | :                       |   |     | 285 |
| Ricinus communis 2             | : | GMAYMFVHDGLVHRRFPVGP | IANVPIFRRVAAAHQLHHTDKFDGVPYGLFLGPKLEEEV  | :                       |   |     | 282 |
| Oncidium Gower Ramsay          | : | GMAYMFVHDGLVHRRFPVGP | IATVPYFQWVAAAHQLHHTDKFDGVPYGLFLGPKLEEEV  | :                       |   |     | 281 |
| Picea sitchensis 1             | : | GMAYMFVHDGLVHRRFPVGP | IADVPYLLKVAHAHQLHHTDKFDGVPYGLFLGPKLEEEV  | :                       |   |     | 316 |
| Picea sitchensis 2             | : | GMAYMFVHDGLVHRRFPVGP | IADVPYLLKVAHAHQLHHTDKFDGVPYGLFLGPKLEEEV  | :                       |   |     | 309 |
| Pinus taeda 1                  | : | GMAYMFVHDGLVHRRFPVGP | IADVPYLLKVAHAHQLHHTDKFDGVPYGLFLGPKLEEEV  | :                       |   |     | 314 |
| Pinus taeda 2                  | : | GMAYMFVHDGLVHRRFPVGP | IANVPIFRRVAAAHQLHHTDKFDGVPYGLFLGPKLEEEV  | :                       |   |     | 291 |
| Muriella zofingiensis          | : | GIMYMFVHDGLVHKRFPVGP | IAQMPAMKRVVAIAHKLHHSDFKFGVPYGLFLGPKLEEEV | :                       |   |     | 281 |
| Haematococcus pluvialis        | : | GMAYMFVHDGLVHRRFPVGP | IAGLPYMKRLTVAHQLHHSDFKFGVPYGLFLGPKLEEEV  | :                       |   |     | 275 |
| Chlamydomonas reinhardtii      | : | GIAYMFVHDGLVHRRFPVGP | IANVPIFRRVAAAHQLHHTDKFDGVPYGLFLGPKLEEEV  | :                       |   |     | 270 |

|                                | * | 380    | *                | 400     | *             |                         |       |
|--------------------------------|---|--------|------------------|---------|---------------|-------------------------|-------|
| <b>Adonis aestivalis</b> CBFD2 | : | GGTEEL | -----            | ERVISR  | -----         | TTKRT--QPST-----        | : 309 |
| <b>Adonis aestivalis</b> CBFD1 | : | GGTEEL | -----            | ERVISR  | -----         | TAKRT--QSST-----        | : 306 |
| Brassica rapa 1                | : | GGDEEL | -----            | DKEISR  | -----         | RIKLY--KKSSSS-----      | : 300 |
| Brassica rapa 2                | : | GGDEEL | -----            | EKEISR  | -----         | RIKLY--KKSSSS-----      | : 306 |
| Arabidopsis thaliana 1         | : | GGNEEL | -----            | DKEISR  | -----         | RIKSY--KKASGSGSSSSS     | : 310 |
| Arabidopsis thaliana 2         | : | GGKEEL | -----            | EKEISR  | -----         | RIKLY--NKGSSTS-----     | : 303 |
| Glycine max 2                  | : | CGLEEL | -----            | EKEISR  | -----         | RIRSG--S-----           | : 301 |
| Medicago truncatula            | : | GGIEEL | -----            | EKKISR  | -----         | RTRSY--TGS-----         | : 296 |
| Glycine max 1                  | : | CGLEEL | -----            | EKEISR  | -----         | RARSY--KIAREKS-----     | : 308 |
| Populus trichocarpa 1          | : | GGLEEL | -----            | EREISR  | -----         | RTKSY--KEL-----         | : 309 |
| Populus trichocarpa 2          | : | CGQEEI | -----            | EREINR  | -----         | RTKSS--KGL-----         | : 309 |
| Ricinus communis 1             | : | GGLEEL | -----            | EKETSR  | -----         | RKKSYS--NGR-----        | : 303 |
| Citrus unshiu                  | : | CGLEEL | -----            | EKEISK  | -----         | RIKSY--NRVPK-----       | : 311 |
| Diospyros kaki                 | : | GGDEEL | -----            | EKEVNR  | -----         | RTRLS--KGS-----         | : 312 |
| Vitis vinifera 2               | : | CGKDEI | -----            | EKEINR  | -----         | RARLS--NGPR-----        | : 303 |
| Ipomea nil                     | : | GGLNDE | -----            | EVEVNR  | -----         | RIKMS--STGR-----        | : 310 |
| Solanum lycopersicum 1         | : | CGLEEL | -----            | EKEVNR  | -----         | RIKIS--KGLL-----        | : 314 |
| Capsicum annuum 1              | : | GVIEEL | -----            | EKEVNR  | -----         | RIKSL--KRL-----         | : 315 |
| Coffea arabica                 | : | CGLEEL | -----            | EKEINR  | -----         | RIKLR--KGS-----         | : 310 |
| Solanum lycopersicum 2         | : | GGTEEL | -----            | EKEVIR  | -----         | RTRLS--KGS-----         | : 309 |
| Capsicum annuum 2              | : | CGLEEL | -----            | EKEVNR  | -----         | RTRYI--KGS-----         | : 308 |
| Vitis vinifera 1               | : | CGMEEL | -----            | EKEISR  | -----         | RIKSS--DSS-----         | : 299 |
| Gentiana lutea                 | : | GGLQVI | -----            | EMEINR  | -----         | RTKNN--QS-----          | : 320 |
| <b>Adonis aestivalis</b> CHYb  | : | GGNEEL | -----            | EKEIER  | -----         | RIKRM--NAL-----         | : 305 |
| Daucus carota 1                | : | CGHEAI | -----            | ELEINR  | -----         | RIKSS--ASRARS-----      | : 309 |
| Zea mays 2                     | : | GGTEEL | -----            | EKEIKR  | -----         | RIRRR--EALDATQ-----     | : 293 |
| Sorghum bicolor 1              | : | GGTEEL | -----            | EKEIKK  | -----         | RIRRR--EALDAIQ-----     | : 271 |
| Oryza sativa japonica 1        | : | GGIEEL | -----            | EKEIKR  | -----         | RIKRK--ETLDAIQ-----     | : 285 |
| Oryza sativa japonica 3        | : | GGTEEL | -----            | DKEIKK  | -----         | RIKRK--EAMDAIR-----     | : 292 |
| Elaeis oleifera                | : | GGTEEL | -----            | QKEINR  | -----         | RIKLY--NSNTDTSG-----    | : 325 |
| Zea mays 3                     | : | GGLDEI | -----            | EKELAR  | -----         | IGRTI-----              | : 308 |
| Sorghum bicolor 2              | : | GGLDEI | -----            | EKELAR  | -----         | IGRTI-----              | : 312 |
| Oryza sativa japonica 2        | : | CGLEEL | -----            | EKELAR  | -----         | INRSL-----              | : 309 |
| Zea mays 1                     | : | GGLDEI | VSSPVSEATDTEDAGE | EKTRPVV | CVVRTSVFMGQSV | PNF-----                | : 319 |
| Tagetes erecta                 | : | GGTEEL | -----            | DKEIOR  | -----         | RIKLY--NNTK-----        | : 309 |
| Crocus sativus 1               | : | GGLKEI | -----            | EKEVSR  | -----         | RIKAY--NNSAEIKT-----    | : 305 |
| Crocus sativus 2               | : | CGLEEL | -----            | EKEVSR  | -----         | LIKAN--H-----           | : 291 |
| Narcissus pseudonarcissus      | : | GGEEEL | -----            | EKLTKR  | -----         | RIEIN--SRSLDVK-----     | : 308 |
| Daucus carota 2                | : | CGNEEL | -----            | EKEINR  | -----         | RIKSS--N-----           | : 303 |
| Ricinus communis 2             | : | GGLEAI | -----            | HTEVQR  | -----         | RIKAS--C-----           | : 300 |
| Oncidium Gower Ramsay          | : | CGMEAI | -----            | EREIKR  | -----         | GVKVF--SSSPNQS-----     | : 305 |
| Picea sitchensis 1             | : | CGHDEI | -----            | EKLFNS  | -----         | KMKGQGLQKHQ-----        | : 339 |
| Picea sitchensis 2             | : | CGRGEL | -----            | EKLFNS  | -----         | KKKGL--QKLQ-----        | : 330 |
| Pinus taeda 1                  | : | CGHDEI | -----            | EKLFNS  | -----         | KMKGL--QKH-----         | : 334 |
| Pinus taeda 2                  | : | GGGEEL | -----            | DKLMKA  | -----         | KTNNA--KQGSTQTVKTP----- | : 319 |
| Muriella zofingiensis          | : | GAGPEI | -----            | DRLCAE  | -----         | LDS--KSS-----           | : 299 |
| Haematococcus pluvialis        | : | CAAEIV | -----            | ERLVLE  | -----         | LDWS--KR-----           | : 293 |
| Chlamydomonas reinhardtii      | : | CGKEEL | -----            | DKLMAD  | -----         | LEA--REAAAAKAAGSS-----  | : 297 |

**Supplemental Figure 4 (below).** Alignment of Polypeptides Encoded by the *A. aestivalis* *hbfd1* and *hbfd2* cDNAs and Related Polypeptides Encoded by cDNAs or Genes of Other Plants and Green Algae. The polypeptides specified by *hbfd1* and *hbfd2* lack 18-20 C-terminal amino acids that are present in other plant and algal polypeptides. These amino acids are encoded by the C-terminal exon of numerous plant genes (including *A. thaliana*, *Medicago truncatula*, *Oryza sativa*, *Populus trichocarpa*, *Solanum tuberosum*, *Sorghum bicolor*, *Vitis vinifera*, and *Zea mays*). **Note:** the N terminal sequence of the HBFD2 polypeptide shown here may be incorrect. A comparison of the nucleotide sequence of the cDNA that encodes HBFD2 (GenBank DQ902555) to those of three *A. aestivalis* ESTs (GenBank FL511168, FL510828 and FL510514) indicates that the cDNA should have an A residue inserted at position 57. The N terminal sequence would then read MARVFLGLKPTLSTGSIVkettvgntlvspl, with those amino acid residues shown in uppercase differing from the sequence shown in the alignment below. Alignment of the sequences was achieved using MAFFT version 6 (Kato and Toh, 2008; the server at <http://mafft.cbrc.jp/alignment/server/> was used). The G-INS-i strategy was used with the BLOSUM45 scoring matrix, a gap opening penalty of 1.2 and an offset value of 0.0. The output was manually adjusted to optimize the alignment. Residues are in white text on a black background where all of the sequences have the same amino acid, in white text on a dark grey background where 75% or more are identical, and in black text on a light grey background where 50% or more of the sequences have the same amino acid. The sequences included in this alignment were obtained from the GenBank protein database (all full length amino acid sequences identified using a blastp search on 2/18/2010) or were generated by assembly and translation of overlapping expressed sequence tags (ESTs) identified *via* a tblastn search of the GenBank nucleotide database and/or the database of ESTs. **GenBank Accession Numbers:** *O. sativa japonica*, EEE51627; *P. edulis*, FP093720; *H. vulgare*, BAJ94288; *T. aestivum*, assembly of CD875809, CA736339, CJ710405 and CJ605231; *S. bicolor*, XP\_002448957; *Z. mays*, assembly of FL318867, EE185978 and EE185979; *A. formosa*, assembly of DT764577 and DT768502; *P. trichocarpa*, XP\_002314088; *R. communis*, XP\_002513532; *V. vinifera*, XP\_002274681; *N. advena* (partial), EU348740; *A. thaliana* At1g50450, NP\_564570; *S. lycopersicum*, AK320320; *H. ciliaris*, assembly of EL425048 and EL422091; *A. annua*, assembly of EY107694 and EY092239; *T. officinale*, assembly of DY819909 and DY827598; *A. aestivalis* HBFD1, ABK41044; *A. aestivalis* HBFD2, ABK41045; *P. sitchensis*, ABR17787; *P.*

*patens*, assembly of BY985399 and XM\_001781386; *C. reinhardtii*, XP\_001701437; *O. lucimarinus*, XP\_001419501; *O. tauri*, XP\_003081093; *Micromonas* sp. RCC299, translation of bases 647766- 649118 of CP001332.

**Reference for Supplemental Figure 4:**

**Katoh, K., and Toh, H. (2008) Recent developments in the MAFFT multiple sequence alignment program. Brief. Bioinform. 9: 286-298.**

|                                | * | 20                                      | * | 40                  | * | 60                     |      |
|--------------------------------|---|-----------------------------------------|---|---------------------|---|------------------------|------|
| Oryza sativa japonica          | : | ---MATVVRACMPL-----                     |   | ---PP---AAVAS---    |   | SS-----                | : 20 |
| Phyllostachys edulis           | : | ---MATMVRACM-----                       |   | ---AA-----          |   | SS-----                | : 13 |
| Hordeum vulgare                | : | ---VRACMPL-----                         |   | ---RTPP---AAASS---  |   | TA-----                | : 19 |
| Triticum aestivum              | : | ---AAMVRACMPL-----                      |   | ---RTPP---AAASS---  |   | TA-----                | : 22 |
| Sorghum bicolor                | : | ---GIVVRACAPP-----                      |   | ---AP---AAAAP---    |   | SG-----                | : 20 |
| Zea mays                       | : | MGAAGIVVRACAPL-----                     |   | ---APAAAAAAAP---    |   | SGSS-----              | : 28 |
| Aquilegia formosa              | : | ---MA---RISFQL-N---                     |   | ---P-----TLFTRV---  |   | KESNS---SN---          | : 23 |
| Populus trichocarpa            | : | ---MI---ARQALFQL-K---                   |   | ---SS-----TSVKA---  |   | CVKE---CKHD---         | : 26 |
| Ricinus communis               | : | ---MA---RVLVFL-Q-K---                   |   | ---S-----TSVMA---   |   | CAKL---CKHD---         | : 19 |
| Vitis vinifera                 | : | ---MA---GASLHL-N---                     |   | ---S-----TTVLA---   |   | SLQE-----              | : 19 |
| Nuphar advena                  | : |                                         |   |                     |   |                        | : -  |
| Glycine max                    | : | ---MA---PLSLPL-NLKWTP-----              |   | ---LSVKA---         |   | TATA---TT-----         | : 25 |
| Arabidopsis thaliana           | : | ---MT---RALLLQPY-----                   |   | ---RATVRA---        |   | ASSRE---TQ-----        | : 23 |
| Solanum lycopersicum           | : | ---MA---SLGMY-S-W---                    |   | ---T-----TGIKKR---  |   | VFVRA---ANLA---        | : 25 |
| Helianthus ciliaris            | : | ---MA---CASMRH-W---                     |   | ---C-----SIRVP---   |   | TVAS-----              | : 19 |
| Artemisia annua                | : | ---MA---CTCMRH-W---                     |   | ---SCN-----TIRSP--- |   | TVAS-----              | : 21 |
| Taraxacum officinale           | : | ---MA---CACMSH-W---                     |   | ---S-----TITTP---   |   | MVAS-----              | : 19 |
| <b>Adonis aestivalis HBFD1</b> | : | ---MA---PVLLGL-K---                     |   | ---P-----TLSTGS---  |   | V-----VKET---          | : 21 |
| <b>Adonis aestivalis HBFD2</b> | : |                                         |   | ---P-----WIETNS---  |   | LHWKL---VKET---        | : 23 |
| Picea sitchensis               | : | ---MH---QPGFIMSAPILWH-----              |   | ---SPIGRR---        |   | NRNRNGIIWCMVSV-----    | : 34 |
| Physcomitrella patens          | : | ---MA---TTTQLARWVLAPEPCNIELNKWVNSTQR--- |   | ---RNQRF---         |   | AQRT--GTRLV---         | : 45 |
| Chlamydomonas reinhardtii      | : | ---MR---RVANTS RATGA-----               |   | ---RCQGAK---        |   | LVARP---CARR-----      | : 28 |
| Ostreococcus lucimarinus       | : | ---MT---TTRGRGRARAANA-----              |   | ---TTTTTT---        |   | RHRRR---HRAV-RARASE--- | : 36 |
| Ostreococcus tauri             | : | ---MG---STRASGGVEGPRS-----              |   | ---RS-----          |   | RR---HRSVARAGATA---    | : 30 |
| Micromonas sp. RCC299          | : | ---MA---SPVARAPSLGA-----                |   | ---RTLGSR---        |   | RVDRS---SRLR-RRPVDG--- | : 34 |

|                                | * | 80                                              | * | 100                  | * | 120 |  |
|--------------------------------|---|-------------------------------------------------|---|----------------------|---|-----|--|
| Oryza sativa japonica          | : | ---AAPSTDAQQRSSSSARVVLVGGTGRVGGSTATALSK---      |   | LRFDLNLIIAGRNLEKG    | : | 76  |  |
| Phyllostachys edulis           | : | ---AAPLTA AAAQR---RSSARVVLVGGTGRVGGSTATALSN---  |   | LRFDLNLIIIGGRNREKG   | : | 67  |  |
| Hordeum vulgare                | : | ---TVPA---APIK---PRSSARVVLVGGTGRVGGSTATALSK---  |   | LSFDLNLIIIGGRNREKG   | : | 70  |  |
| Triticum aestivum              | : | ---TAPA---APSK---PRSSARVVLVGGTGRVGGSTATALSK---  |   | LRFDLNLIIIGGRNREKG   | : | 73  |  |
| Sorghum bicolor                | : | ---SREA---AQQRSSRQSRRTARVVLVGGTGRVGGSTATALSK--- |   | LRFDLNLIIIGGRNREKG   | : | 75  |  |
| Zea mays                       | : | ---SRDA---AQQRWSKPSRTGRVVLVGGTGRVGGSTATALSK---  |   | LRFDLNLIIIGGRNREKG   | : | 83  |  |
| Aquilegia formosa              | : | ---ESQLLNLQNK---QIKNSRVLVGGTGRVGGSTALALSK---    |   | LSFDLHLLVGGGRNREKG   | : | 77  |  |
| Populus trichocarpa            | : | ---NSNSNVQLPE---KTRNSRVLVGGTGRVGGSTATALSK---    |   | FCFDLRIIVIGGRNREKG   | : | 80  |  |
| Ricinus communis               | : | ---DTNRVELPE---KTRNSRVLVGGTGRVGGSTAIALSK---     |   | LCFDLRIIVIGGRNREKG   | : | 71  |  |
| Vitis vinifera                 | : | ---NQPRVHLEPE---KTANRRVVLVGGTGRVGGSTAIALSK---   |   | LCFDLRIIVIGGRNREKG   | : | 71  |  |
| Nuphar advena                  | : | ---R---RGVE---KS---RVLVGGTGRVGGSTAVALS---       |   | LCFDLRIIVIGGRNREKG   | : | 45  |  |
| Glycine max                    | : | ---TSKVPEVPLPE---KIRNSRVLVGGTGRVGGSTAIALSN---   |   | LCFDLRIIVIGGRNREKG   | : | 79  |  |
| Arabidopsis thaliana           | : | ---YDGVPEVKFSD---PSRNYRVLVGGTGRVGGSTATALSK---   |   | LCFDLRIIVIGGRNREKG   | : | 77  |  |
| Solanum lycopersicum           | : | ---KENEKRVEVAE---EVRNSKAVILVGGTGRVGGSTAIALSK--- |   | LCFDLRIIVIGGRNREKG   | : | 79  |  |
| Helianthus ciliaris            | : | ---ASLQP---ETANSRVLVLRGTGRVGGSTAIALSK---        |   | LSFDLRIIVIGGRNREKG   | : | 67  |  |
| Artemisia annua                | : | ---A---GNVNSKVLVGGTGRVGGSTALALSK---             |   | LCFDLRIIVIGGRNREKG   | : | 65  |  |
| Taraxacum officinale           | : | ---VIPPK---ESVHSRVLVGGTGRVGGSTAVALS---          |   | LSFDLRIIVIGGRNREKG   | : | 67  |  |
| <b>Adonis aestivalis HBFD1</b> | : | ---NVGSTLASPLN---KTQNSRVLVGGTGRVGGSTALALSK---   |   | FSEDLRIIVIGGRNREKG   | : | 75  |  |
| <b>Adonis aestivalis HBFD2</b> | : | ---TVGNLTVSPLN---KTQNSRVLVGGTGRVGGSTAFALS---    |   | FSEDLRIIVIGGRNREKG   | : | 77  |  |
| Picea sitchensis               | : | ---SSSERVE-SI---KSDNGRVLVGGTGRVGGSTATAALV---    |   | SCFDLRIIVIGGRNREKG   | : | 87  |  |
| Physcomitrella patens          | : | CHAKGSE-AGEEA---GGQKKVLMGGTGRVGGSTALALAK---     |   | GGDLHLIVIGGRNREKG    | : | 99  |  |
| Chlamydomonas reinhardtii      | : | ---AAVHVICATG---PVPDKSVVLVGGTGRVGGSTAAAL---     |   | EFENLKVTVASRSDDSF    | : | 81  |  |
| Ostreococcus lucimarinus       | : | DANEASERTTTT---TTTTTKVVLVGGTGRVGGSTATAALV---    |   | VRGANGGVEVTLGGRSERD  | : | 93  |  |
| Ostreococcus tauri             | : | STGDAT-RAEGER---GGVDARVVLVGGTGRVGGSTATAAL---    |   | AR-AGEGTTVTLGRSSDGA  | : | 85  |  |
| Micromonas sp. RCC299          | : | HAPSSRRRSLAV---AAEKKVVFVGGTGRVGGSTATAAL---      |   | LR-QEFGVALVLAGRTSESS | : | 90  |  |

|                                | * | 140              | *   | 160               | *                             | 180            |               |             |   |     |
|--------------------------------|---|------------------|-----|-------------------|-------------------------------|----------------|---------------|-------------|---|-----|
| Oryza sativa japonica          | : | ESLASKLGD        | --- | ESEFVQ            | DIRDRNMLEEVLQ                 | --             | DVDLVVHAAGPFQ | RENECTVLQAA | : | 129 |
| Phyllostachys edulis           | : | RSLASKLGE        | --- | QSEFLE            | DIRNANMLEEALQ                 | --             | GVDLVVHAAGPFQ | REDKCTVLQAA | : | 120 |
| Hordeum vulgare                | : | ESLASKLGE        | --- | QSEFVE            | IDTGNAAMLEKALE                | --             | DVDLVVHTAGPFQ | REAECTVLRRA | : | 123 |
| Triticum aestivum              | : | ESLASELGE        | --- | QSEFVK            | IDTGNAAMLEKALE                | --             | DVDLVVHTAGPFQ | REAECTVLRRA | : | 126 |
| Sorghum bicolor                | : | ESVAAKLG         | --- | QSEFVQ            | DIRNAGMLEEALQ                 | --             | GVDLVVHTAGPFQ | RAEECTVLQAA | : | 128 |
| Zea mays                       | : | ESIAAKLGG        | --- | QSEFVQ            | DIRNAGMLEEALQ                 | --             | GVDLVVHTAGPFQ | RAEECTVLQAA | : | 136 |
| Aquilegia formosa              | : | DALVSKLGE        | --- | NSEFVE            | VNIENVKSLEAALN                | --             | DVDLVVHTAGPFQ | QAENCTVLEAA | : | 130 |
| Populus trichocarpa            | : | AAMVGQLGR        | --- | NSEFTE            | VNIENVDSLGAALK                | --             | DVDLVVHAAGPFQ | QAAKCTVLEAA | : | 133 |
| Ricinus communis               | : | AALVDKLGK        | --- | NSDFAQ            | VINDNVESLEAALS                | --             | DVDLVVHAAGPFQ | QTEKCTVLEAA | : | 124 |
| Vitis vinifera                 | : | AAMLAKLGE        | --- | NSEFAE            | VNIDNVKSLEAALN                | --             | DVDLVVHTAGPFQ | QAEKCTVLEAA | : | 124 |
| Nuphar advena                  | : | AALVSKLGE        | --- | NSEFVE            | VNINDALVEALK                  | --             | DVDLVVHAAGPFQ | QGGKCTVLEAA | : | 98  |
| Glycine max                    | : | EVLTAKLG         | --- | NSEFAR            | VIDDDVNSLETALK                | --             | NVDLVVHAAGPFQ | QAERCTVLEAA | : | 132 |
| Arabidopsis thaliana           | : | EAMVAKLGE        | --- | NSEFSQ            | VINDAKMLETSLR                 | --             | DVDLVVHAAGPFQ | QAPRCTVLEAA | : | 130 |
| Solanum lycopersicum           | : | AAMVSKLGK        | --- | NAEFAE            | VNIDREALLEANLT                | --             | DADLVVHAAGPFQ | QSENCVLEAA  | : | 132 |
| Helianthus ciliaris            | : | ASMAATLEN        | --- | NAEFAQ            | VINDAKSLESALT                 | --             | DVDLVVHAAGPFQ | QTEKCTVLEAA | : | 120 |
| Artemisia annua                | : | ANMVTTLGN        | --- | NAEFAE            | VINDDKSLDSALT                 | --             | DVDLVVHAAGPFQ | QTEKCTVLEAA | : | 118 |
| Taraxacum officinale           | : | ARMVATLGN        | --- | NVEFCE            | FINDYNLLESALT                 | --             | DVDLVVHAAGPFQ | QTHNCTVLEAA | : | 120 |
| <b>Adonis aestivalis HBFD1</b> | : | DAVSKLGE         | --- | NSEFVE            | VNVDSVRSLESAL                 | --             | DVDLVVHAAGPFQ | QAEKCTVLEAA | : | 128 |
| <b>Adonis aestivalis HBFD2</b> | : | DAVSKLGE         | --- | NSEFVE            | VNVDSVRSLESAL                 | --             | DVDLVVHAAGPFQ | QAEKCTVLEAA | : | 130 |
| Picea sitchensis               | : | AKLAAELGA        | --- | NTEFYQ            | VSIDNTKALAAALD                | --             | GVDLVVHAAGPFQ | REEKCTVLEAA | : | 140 |
| Physcomitrella patens          | : | EALARELGG        | --- | SVTEFS            | AFNLEDAVRAAID                 | --             | GVDLVVHAAGPFQ | RRVECAVLEAA | : | 152 |
| Chlamydomonas reinhardtii      | : | KAVERRPEL        | --  | SKAGFQR           | VITNADSVQALLKSTGADLVIIHTAGPFQ |                |               | RSKNYAVLEAA | : | 138 |
| Ostreococcus lucimarinus       | : | AEAKARHRL        | --  | ANASFVE           | VDVCKASVTRAIQ                 | --             | GADLVINTAGPFQ | RRKSCAALEAA | : | 148 |
| Ostreococcus tauri             | : | SEARSRHPSL       | --  | ANASFVE           | VDVCKASVRRRAIE                | --             | GADLVINTAGPFQ | RRTSVALEAA  | : | 140 |
| Micromonas sp. RCC299          | : | TAAVERHPTLRSSSCA |     | FAACDCSDPASLEAVIA | --                            | GADLVVHSAAGPFQ | GGGDAQAVLDA   |             | : | 148 |

|                                | * | 200        | *                                    | 220                        | *               | 240 |     |
|--------------------------------|---|------------|--------------------------------------|----------------------------|-----------------|-----|-----|
| Oryza sativa japonica          | : | IATKTAYIDV | CDDTDYSWRAK                          | -GFHEQAKDCGIPAITTAGIYPGVS  | NVMAAELVHAARS-  |     | 187 |
| Phyllostachys edulis           | : | ISTKTAYIDV | CDDLDSWRAK                           | -GFHEQAKDCGVPAITTAGIYPGVS  | NVMAAELVHAARS-  |     | 178 |
| Hordeum vulgare                | : | ISTKTAYIDV | CDDMDYSWRAK                          | -AFHEEAKAQGVPAITTAGIYPGVS  | NVMAAELVDAARS-  |     | 181 |
| Triticum aestivum              | : | ISTKTAYIDV | CDDMDYSWRAK                          | -AFHEEAKAQGVPAITTAGIYPGVS  | NVMAAELVNAARS-  |     | 184 |
| Sorghum bicolor                | : | ISTKTAYIDV | CDDTDYSWRAK                          | -GFHEQAKAAGVPAITTAGIYPGVS  | NVMAAELVHAARS-  |     | 186 |
| Zea mays                       | : | ISTKTAYIDV | CDDTDYSWRAK                          | -GFHEQAKAAGVPAITTAGIYPGVS  | NVMAAELVHAARS-  |     | 194 |
| Aquilegia formosa              | : | ISTKTAYMDV | CDDTYSYSLQAK                         | -SLHEKAVAAANIPAITTAGIYPGVS | NVMAAELVRSARD-  |     | 188 |
| Populus trichocarpa            | : | IETKTAYVDV | CDDTYSYALRAK                         | -SFKDKALAAANIPAITTAGIYPGVS | NVMAAELVRAAKT-  |     | 191 |
| Ricinus communis               | : | IATKTAYIDV | CDDTYSYALRAK                         | -SFKDRALAAANIPAITTAGIYPGVS | NVMAAELVRAARM-  |     | 182 |
| Vitis vinifera                 | : | IETKTAYVDV | CDDTYSYAWRAK                         | -SLEKALSANVPAITTAGIYPGVS   | NVMAAELVRSARS-  |     | 182 |
| Nuphar advena                  | : | ISTKTAYLDV | CDDTYSYAYRAK                         | -SVHQKAVDANVSAITTAGIYPGVS  | NVMAAELVRLARN-  |     | 156 |
| Glycine max                    | : | INTQTAYLDV | CDDTYSYAWRAK                         | -SFMNRALDANVPAITTAGIYPGVS  | NVMAAELVRAA-N-  |     | 189 |
| Arabidopsis thaliana           | : | IKTKTAYLDV | CDDTYSYAFRAK                         | -SLEAEAAANIPAITTAGIYPGVS   | NVMAAELVAAARS-  |     | 188 |
| Solanum lycopersicum           | : | IGTKTAYLDV | CDDTYSYATRAK                         | -SYMMALEAAANIPAITTAGIYPGVS | NVMAAELVRTAKL-  |     | 190 |
| Helianthus ciliaris            | : | IRAKTAYLDV | CDDTYSYALRAK                         | -SFMNEAALAAKVPAITTAGIYPGVS | NVMAAELVRAKVS-  |     | 178 |
| Artemisia annua                | : | IRAKTAYLDV | CDDTYSYALRAK                         | -SFKDEAALAAKVPAITTAGIYPGVS | NVMAAELVRAKE-   |     | 176 |
| Taraxacum officinale           | : | IRTKTAYLDV | CDDTYSYALRAK                         | -TYKNEAALAAKVPAITTAGIYPGVS | NVMAAELVRIAKS-  |     | 178 |
| <b>Adonis aestivalis HBFD1</b> | : | ISTRAYVDV  | CDDTYSYSMQAK                         | -SFHDKAVAAANVPAITTAGIYPGVS | NVMAAELVRSARD-  |     | 186 |
| <b>Adonis aestivalis HBFD2</b> | : | ISTRAYVDV  | CDDTYSYSMQAK                         | -SFHDKAVAAANVPAITTAGIYPGVS | NVMAAELVRSARD-  |     | 188 |
| Picea sitchensis               | : | ISSKTAYIDV | CDDTYSYSLQAK                         | -TFHEKAVAAQVPAITTAGIYPGVS  | NVMAAELVRLARTS- |     | 199 |
| Physcomitrella patens          | : | IDTKTAYIDV | CDDQDYSMRRAK                         | -AYHDRVAAAGIPAITTAGIYPGVS  | NVMAAELVRL----  |     | 207 |
| Chlamydomonas reinhardtii      | : | IASGTYIDV  | CDDTYPFAEAKAAAYMEKAKAAGVPAIVSGIYPGVS | NVMAAELVRSARD-             |                 |     | 197 |
| Ostreococcus lucimarinus       | : | LESGVKYLDV | CDDASYSYGAFAK                        | -KLESEKAKAAGVAITCAGIYPGVS  | NVMAAELVRSARD-  |     | 206 |
| Ostreococcus tauri             | : | TECGVKYLDV | CDDASYSYGAFAK                        | -KLESEKAKAAGVAITCAGIYPGVS  | NVMAAELVRSARD-  |     | 198 |
| Micromonas sp. RCC299          | : | IATGVFVLDV | CDDAAYAKACR                          | -SKSDAAKSKGVECVTTGGIYPGVS  | NVMAAELVRSARD-  |     | 206 |

|                                | * | 260       | *          | 280        | *         | 300        |                 |                |       |
|--------------------------------|---|-----------|------------|------------|-----------|------------|-----------------|----------------|-------|
| Oryza sativa japonica          | : | ---E----- | NACEPERLRF | FFYYTAGT   | GGAGPTIL  | TTSFLLLA   | EDVIAYNKGE      | : 231          |       |
| Phyllostachys edulis           | : | ---E----- | NACEPERLRF | FFYYTAGS   | GGAGPTIL  | TTSFLLLG   | EDVIAYNKGE      | : 222          |       |
| Hordeum vulgare                | : | ---E----- | D-CEPERLRF | FFYYTAGS   | GGAGPTIL  | ATSFLLLG   | EDVIAYNKGE      | : 224          |       |
| Triticum aestivum              | : | ---E----- | D-CEPERLRF | FFYYTAGS   | GGAGPTIL  | ATSFLLLG   | EDVIAYNKGE      | : 227          |       |
| Sorghum bicolor                | : | ---E----- | N-CEPERLRF | FFYYTAGT   | GGAGPTIL  | ATSFLLLG   | EDVIAYNKGE      | : 229          |       |
| Zea mays                       | : | ---E----- | N-CEPERLRF | FFYYTAGT   | GGAGPTIL  | TTSFLLLG   | EDVIAYNKGE      | : 237          |       |
| Aquilegia formosa              | : | ---E----- | NMCEPQRLRF | FSYYTAGT   | GGAGPTIL  | ATSFLLLG   | EEVVAYNKGE      | : 232          |       |
| Populus trichocarpa            | : | ---E----- | SKGKPERLRF | FFYYTAGS   | GGAGPTIL  | ATSFLLLG   | EEVVAYNKGE      | : 235          |       |
| Ricinus communis               | : | ---E----- | SKGNPERLRF | HHYYTAGT   | GGAGPTIL  | ATSFLLLG   | EEVVAYNKGE      | : 226          |       |
| Vitis vinifera                 | : | ---E----- | SQKPERLRF  | FFYYTAGT   | GGAGPTIL  | ATNFFLLG   | EEVVAYNKGE      | : 226          |       |
| Nuphar advena                  | : | ---E----- | GTVEPERLRF | FFYYTAGS   | GGAGPTIL  | ATSFLLLG   | EDVVAYNKGE      | : 200          |       |
| Glycine max                    | : | ---E----- | SEDKPERLRF | FFYYTAGT   | GGAGPTIL  | ATSFLLLG   | EEVVAYNKGE      | : 233          |       |
| Arabidopsis thaliana           | : | ---E----- | DKGKPEKLR  | FRFSYYTAGT | GGAGPTIL  | ATSFLLLG   | EEVVAYNKGE      | : 232          |       |
| Solanum lycopersicum           | : | ---E----- | SECELERLRF | FFYYTAGT   | GGAGPTIL  | ATSFLLLG   | EDVIAYNKGE      | : 234          |       |
| Helianthus ciliaris            | : | ---E----- | NKCEPERLRF | FFYYTAGT   | GGAGPTIL  | ATSFLLLG   | EEVVAYNKGE      | : 222          |       |
| Artemisia annua                | : | ---E----- | NKCEPERLRF | FFYYTAGT   | GGAGPTIL  | ATSFLLLG   | EEVVAYNKGE      | : 220          |       |
| Taraxacum officinale           | : | ---E----- | NKCEPERLRF | FFYYTAGT   | GGAGPTIL  | ASSILVLLG  | EDAIAYSRK       | : 222          |       |
| <b>Adonis aestivalis HBFD1</b> | : | ---E----- | NT-EPQRLRF | FSYFTAGS   | GGAGPTI   | SLVTSFLLG  | EEVVAyseGE      | : 229          |       |
| <b>Adonis aestivalis HBFD2</b> | : | ---E----- | NT-EPQRLRF | FSYFTAGS   | GGAGPTI   | SLVTSFLLG  | EEVVAyseGE      | : 231          |       |
| Picea sitchensis               | : | SSK       | EPERLRF    | FSYFTAGS   | GGAGPTI   | LATSFLLL   | REVIAYRKGE      | : 246          |       |
| Physcomitrella patens          | : | ---       | N-CKAKRIR  | ISYSYTAGS  | GGAGPTIL  | ATSFLLLG   | EEAIVVVDK       | : 249          |       |
| Chlamydomonas reinhardtii      | : | ---       | EYDDNWN    | YRTPAPGESV | EPKWLRYS  | YYTAGS     | GGAGPTILETSFLLG | EDVIVYKDNK     | : 254 |
| Ostreococcus lucimarinus       | : | ---       | FRATEENE   | ---        | GKEPEVEV  | YLYNYFTAGS | GGVGTITLATS     | YLLCEDVVCWEDQ  | : 259 |
| Ostreococcus tauri             | : | ---       | FRREQEGNE  | ---        | NTDPEVEV  | YLYNYFTAGS | GGVGTITLATS     | YLLCEDVVCWENDK | : 251 |
| Micromonas sp. RCC299          | : | ---       | SGSEG      | ---        | AEVAPEVEV | YLYNYFCAGS | GGVGTITLATS     | YMLCEDVVCWDKGE | : 255 |

|                                | * | 320      | *           | 340      | *         | 360         |                        |                      |       |
|--------------------------------|---|----------|-------------|----------|-----------|-------------|------------------------|----------------------|-------|
| Oryza sativa japonica          | : | EI-----  | KLKPYSGALS  | IDFGKGV  | RKKDVYLLN | LPEVKSAY    | KVLCVPTVSARFGT         | : 281                |       |
| Phyllostachys edulis           | : | EI-----  | KLKPYSGALNI | IDFGKGV  | RKKDVYLLN | LPEVKSAY    | KILCVPTVSARFGT         | : 272                |       |
| Hordeum vulgare                | : | EI-----  | KLKPYSGVLNI | IDFGKGV  | RKKDVYLLN | LPEVKSAY    | HKFLCVPTVSARFGT        | : 274                |       |
| Triticum aestivum              | : | EI-----  | KLKPYSGVLNI | IDFGKGV  | RKKDVYLLN | LPEVKSAY    | HKFLCVPTVSARFGT        | : 277                |       |
| Sorghum bicolor                | : | SSLCTSAI | APMEFHTPY   | SGALNIDF | GKGV      | RKKNVYLLN   | LPEVKSAYKILCVPTVSARFGT | : 289                |       |
| Zea mays                       | : | EI-----  | KLKPYSGALNI | IDFGKGV  | RKKNVYLLN | LPEVKSAY    | KILCVPTVSARFGT         | : 287                |       |
| Aquilegia formosa              | : | KI-----  | KLKPYTGL    | MLNVD    | FGKGI     | CKRDIVYLLN  | LPEVRS                 | SAHEILCIPPTVSARFGT   | : 282 |
| Populus trichocarpa            | : | KI-----  | KLKPYSGMLNI | IDFGKGI  | CKRDVYLLN | LPEVRS      | SAHDVLCIPPTVSARFGT     | : 285                |       |
| Ricinus communis               | : | RI-----  | KLKPYSGMLNI | IDFGKGI  | CKRDVYLLN | LPEVRS      | SAHEILCIPPTVSARFGT     | : 276                |       |
| Vitis vinifera                 | : | KI-----  | KLKPYSGMLNI | IDFGKGI  | CKRDVYLLH | LPEVRS      | SAHEILCVPTVSARFGT      | : 276                |       |
| Nuphar advena                  | : | KI-----  | KLKPYSGMLNI | IDFGKGI  | CKRDVYLLN | LPEVRS      | THEVLCVPTVSARFGT       | : 250                |       |
| Glycine max                    | : | KI-----  | RMRPYSGMLN  | VD       | FGKGI     | CKRDVYLLN   | LPEVRS                 | SAHEILCVPSVARSARFGT  | : 283 |
| Arabidopsis thaliana           | : | KV-----  | KLKPYSGMITV | DFGKGI   | CKRDVYLLN | LPEVRS      | THEVLCVPTVARSARFGT     | : 282                |       |
| Solanum lycopersicum           | : | KI-----  | KLTPYSGMLSI | DFGMGI   | CKKDVYLLN | LPEVKS      | VHEVLCVPTVSARFGT       | : 284                |       |
| Helianthus ciliaris            | : | KI-----  | KLKPYSGMLSI | DFGKGI   | CKKDVYLLN | LPEVTS      | SAHEVLCVPTVSARFGT      | : 272                |       |
| Artemisia annua                | : | KI-----  | KLKPYSGMLNI | IDFGKGI  | CKKDVYLLN | LPEVTS      | THEVLCVPTVSARFGT       | : 270                |       |
| Taraxacum officinale           | : | KI-----  | KLKPYSGKVN  | IDFGKGI  | KKNVYLLN  | LPEVTS      | THETLCIPSVARSARFGT     | : 272                |       |
| <b>Adonis aestivalis HBFD1</b> | : | KV-----  | ELKPYTEK    | LNID     | FGKGV     | CKRDVYLLN   | LPEVRS                 | GHEILCVPTVSARFGT     | : 279 |
| <b>Adonis aestivalis HBFD2</b> | : | KV-----  | ELKPYTEK    | LNID     | FGKGV     | CKRDVYLLN   | LPEVRS                 | GHEILCVPTVSARFGT     | : 281 |
| Picea sitchensis               | : | EF-----  | RAKPYSGV    | LDID     | FGKGV     | CKRSVYLLN   | LPEVGS                 | THEVLCVPTVSARFGT     | : 296 |
| Physcomitrella patens          | : | MQ-----  | KMKAYSARR   | VD       | DFCR      | GICKKPVYLLN | LPEVRS                 | THEVLCVPSVARSARFGT   | : 299 |
| Chlamydomonas reinhardtii      | : | EV-----  | VLPPEIS     | NRREV    | DFGPGV    | GRKGVYLYN   | LPEVVS                 | GHKYMRVDPVSARFGT     | : 304 |
| Ostreococcus lucimarinus       | : | RI-----  | VEKPA       | SQRKVV   | DFGKGV    | GRREVFLY    | NLPEVAS                | TREIFCARTVKARFGT     | : 309 |
| Ostreococcus tauri             | : | RV-----  | VEKPA       | SQRKVV   | DFGQGV    | CKREVFLY    | NLPEVAS                | TREYLCASTVKARFGT     | : 301 |
| Micromonas sp. RCC299          | : | RV-----  | VTRPE       | ATQRKVV  | DFGK      | CKKREVFLY   | NLPE                   | CASARETWNAAETVKARFGT | : 305 |



|                                  | * | 380       | *         | 400     | *   | 420   |                               |                  |
|----------------------------------|---|-----------|-----------|---------|-----|-------|-------------------------------|------------------|
| <i>Oryza sativa japonica</i>     | : | APFFWNWV  | QAFANFLPV | EFRLDRK | NKV | LVKLV | GVFVDPFVRAIDGIAGERVSMRV       | DDCSNG : 341     |
| <i>Phyllostachys edulis</i>      | : | APFFWNWGM | QAFAKFLPV | EFRLDRK | NKV | LVKLV | VELVDFVRAIDGIAGERVSMRV        | LECSNG : 332     |
| <i>Hordeum vulgare</i>           | : | APFFWNWGM | BAFANFLPV | ELLRDK  | KVR | KLV   | EKIDPLVRAIDGIVGERVSMRV        | LECSNG : 334     |
| <i>Triticum aestivum</i>         | : | APFFWNWGM | BAFANFLPV | ELLRDK  | KVG | KLV   | EQIDPLVRAIDGIVGERVSMRV        | LECSNG : 337     |
| <i>Sorghum bicolor</i>           | : | APFFWNWGM | QAFANFLPV | EFRLDRN | KVQ | LVQ   | SVDPFLVRAVDGIAGERVSMRV        | DDCSNG : 349     |
| <i>Zea mays</i>                  | : | APFFWNWGM | QAFANFLPV | EFRLDRN | KVQ | LVQ   | SVDPFLVRAVDGIAGEHVS           | SMRVDDCSNG : 347 |
| <i>Aquilegia formosa</i>         | : | APFFWNWGM | AAMTSLI   | PSEVLR  | DRK | VQ    | LVDFVVRVIDGIAGERVSMRV         | DDCSND : 342     |
| <i>Populus trichocarpa</i>       | : | APFFWNWGM | SAMTNLLS  | PEFLK   | DR  | T     | KVQQLVQLFDPFLVRAVDGIAGERVSMRV | LECTDG : 345     |
| <i>Ricinus communis</i>          | : | SPFFWNWGM | EIMTNLFP  | PEVLR   | DRS | KV    | QQLVQLFDPFLVRAVDGIAGERVSMR    | IIDLECSDG : 336  |
| <i>Vitis vinifera</i>            | : | APFFWNWGM | BAFANFLPV | ELLRDR  | NKV | Q     | LVQLFDFIVRAMDGIAGERVSMRV      | LECSDG : 336     |
| <i>Nuphar advena</i>             | : | APFFWNWGM | AMANLVP   | AEILR   | DR  | KV    | QQLVTLFDPFLVRAVDGIAGERVSMRV   | LECSNG : 310     |
| <i>Glycine max</i>               | : | APFFWNWGM | BAFAMTKLL | PSEVLR  | DRN | KV    | QSLVQLFDPVVRVIDGIAGERVSMRV    | LECSAG : 343     |
| <i>Arabidopsis thaliana</i>      | : | APFFWNWGM | EIMTKLLP  | SEVLR   | DR  | T     | KVQQLVQLFDFVVRVIDGIAGERVSMRV  | LECSDG : 342     |
| <i>Solanum lycopersicum</i>      | : | DPFFWNWGM | IAMRNLLP  | QEFRL   | DRS | KV    | QQLVQLFDPVVRVIDGTAGEAVSMRV    | LECSDG : 344     |
| <i>Helianthus ciliaris</i>       | : | APFFWNWAM | DAMTRFL   | PSVLR   | DRS | KV    | QEMVRLFDVVRVIDGIAGECLAMRV     | LECSGG : 332     |
| <i>Artemisia annua</i>           | : | APFFWNWAM | DAMTRFV   | SEVLR   | DRS | KV    | QEMVRLFDVVRVIDGIAGERVSMR      | IVDVECSGG : 330  |
| <i>Taraxacum officinale</i>      | : | SPFFWNWAM | DAMTRV    | PSVLR   | DRN | KV    | QEMVRLFDVVRVIDGIAGEHVALRV     | LECSGG : 332     |
| <b>Adonis aestivalis HBFD1</b>   | : | APFFWNWAM | VAMTTL    | PPGIL   | DRN | K     | IGMIFANFVYPSVQIFDGIAGECLAMRV  | LECSGG : 339     |
| <b>Adonis aestivalis HBFD2</b>   | : | APFFWNWAM | VAMTSL    | PPGIL   | DRN | K     | IEKIFANFVYPSVQVFDGIAGECLAMRV  | LECSGG : 341     |
| <i>Picea sitchensis</i>          | : | APFFWNWAM | SIVVNL    | APV     | EF  | L     | KDRNKVQTLVQLSDPLVRAIDIFSGELMS | SMRVLECMDG : 356 |
| <i>Physcomitrella patens</i>     | : | YEQIWN    | IAMGLVAS  | LV      | PKD | IL    | QDQKQVQGLVQLSIIAVRAVDGFA      | CEKVS            |
| <i>Chlamydomonas reinhardtii</i> | : | DPFIWNWAM | WLTARL    | VPRSL   | LN  | DRN   | FVKGFAKLSDFVVRVIDKII          | ICEAAMRV         |
| <i>Ostreococcus lucimarinus</i>  | : | SPGIWNGAM | VIAIANL   | VPKSL   | LEN | Q     | DAMKGLANFSAFIVRSDVAIVGETT     | SIRV             |
| <i>Ostreococcus tauri</i>        | : | SPGLWNGAM | VIAIANV   | PKAL    | LEN | Q     | DAMKGLAGFTAIVRAVDVAIVGETT     | SIRV             |
| <i>Micromonas sp. RCC299</i>     | : | SPGLWNGAM | ALMANL    | VPK     | ETL | LN    | KDVAKALATFTAIVRAVDVAIVGETT    | AMRIV            |

|                                  | * | 440    | *   | 460 | *  | 480  |             |      |                    |                 |        |      |          |        |       |      |         |         |       |       |
|----------------------------------|---|--------|-----|-----|----|------|-------------|------|--------------------|-----------------|--------|------|----------|--------|-------|------|---------|---------|-------|-------|
| <i>Oryza sativa japonica</i>     | : | KNTI   | CLF | SHR | KL | SV   | SGYATAAFVLA | VL   | EGSTQPGVWFPEE      | PEGV            | AIESR  | KVLL | ERASQ    | : 401  |       |      |         |         |       |       |
| <i>Phyllostachys edulis</i>      | : | KNTI   | CLF | THR | KL | SV   | SGHATAAFVLA | VL   | EGNTQPGVWFPEE      | PEGV            | AIEAR  | KLLL | ERASQ    | : 392  |       |      |         |         |       |       |
| <i>Hordeum vulgare</i>           | : | RNTI   | CLF | SHR | KL | SV   | SGHSTAAFVQ  | AV   | LEGSTQPGVWFPEE     | PEGIA           | AIESR  | KLLL | ERASQ    | : 394  |       |      |         |         |       |       |
| <i>Triticum aestivum</i>         | : | RNTI   | CLF | SHR | KL | SV   | SGHSTAAFVQ  | AV   | LEGSTQPGVWFPEE     | PEGIA           | AIESR  | KLLL | ERASQ    | : 397  |       |      |         |         |       |       |
| <i>Sorghum bicolor</i>           | : | RNTI   | CLF | THK | KL | SV   | SGYATAAFAL  | AV   | LEGNTPQGVWFPEE     | PEGIP           | MEAR   | KLLL | ERASQ    | : 409  |       |      |         |         |       |       |
| <i>Zea mays</i>                  | : | RNTI   | CLF | THK | KL | SV   | SGFATAAFAL  | AV   | LEGNTPQGVWFPEE     | PEGIR           | IEAR   | KLL  | ERASQ    | : 407  |       |      |         |         |       |       |
| <i>Aquilegia formosa</i>         | : | RSTV   | CLF | SHR | KL | SV   | SGTSTAAFAL  | AV   | LEGSTQPGVWFPEE     | PEGIA           | VDD    | RELL | ORASQ    | : 402  |       |      |         |         |       |       |
| <i>Populus trichocarpa</i>       | : | RNTL   | CLF | SHR | KL | SV   | SGNATAAFAL  | AV   | LEGSTQPGVWFPEE     | PEGIA           | IEAR   | RELL | NRATEG   | : 405  |       |      |         |         |       |       |
| <i>Ricinus communis</i>          | : | RNTV   | CLF | SHR | KL | SV   | SGNATAAFVLA | AIL  | EGSTKPGVWFPEE      | PEGIA           | TEAR   | EVLL | ORAAEG   | : 396  |       |      |         |         |       |       |
| <i>Vitis vinifera</i>            | : | RNTV   | CLF | SHR | KL | SV   | SGFATAAFAL  | AV   | LEGSTQPGVWFPEE     | PEGIA           | IDAR   | DILL | KRAAQ    | : 396  |       |      |         |         |       |       |
| <i>Nuphar advena</i>             | : | RSTV   | CLF | SHR | KL | SE   | SVGTATAAFV  | MA   | ILEGSTKPGVWFPEE    | PEGIV           | SEAR   | KALL | ERASKG   | : 370  |       |      |         |         |       |       |
| <i>Glycine max</i>               | : | RNTV   | CLF | SHR | KL | SV   | SGIATAAFAL  | AIL  | EGSTRPGVWFPEE      | EAQ             | IP     | IEAR | EVLL     | KRASQ  | : 403 |      |         |         |       |       |
| <i>Arabidopsis thaliana</i>      | : | RTTV   | CLF | SHR | KL | SV   | SGVSTAAFV   | MA   | MLEGSTQPGVWFPEE    | PPQ             | IAVEAR | EVLL | KRASQ    | : 402  |       |      |         |         |       |       |
| <i>Solanum lycopersicum</i>      | : | HNRI   | CLF | SHR | KL | SR   | SVGIS       | TA   | AFVLA              | MLEGSTKPGVWFPEE | PEGIA  | VEAR | EVLL     | ORASEG | : 404 |      |         |         |       |       |
| <i>Helianthus ciliaris</i>       | : | RQTI   | CLF | SHR | KL | SV   | SGYSTAA     | FAL  | AVLEGNTPQGVWFPEE   | Q               | PEGIA  | VEAR | GLLERATQ | : 392  |       |      |         |         |       |       |
| <i>Artemisia annua</i>           | : | RQTI   | CLF | SHR | KL | SV   | SGHSTAAFAL  | AIL  | EGSTQPGVWFPEE      | PPQ             | IAVEAR | EVLL | ERAAQ    | : 390  |       |      |         |         |       |       |
| <i>Taraxacum officinale</i>      | : | QHTV   | SIF | SHR | KL | SV   | SGTSTA      | AFAL | AVLEGSTQPGVWFPEE   | PPQ             | IAVEAR | EVLL | KRASQ    | : 392  |       |      |         |         |       |       |
| <b>Adonis aestivalis HBFD1</b>   | : | RNTF   | CLF | SHR | KL | SV   | SGTSTA      | AFV  | MAILEGSTQPGVWFPEE  | PPQ             | IAIS   | DR   | RELL     | ORASQ  | : 399 |      |         |         |       |       |
| <b>Adonis aestivalis HBFD2</b>   | : | RNTS   | AIL | SHR | KL | SEL  | VGTSTA      | AFV  | MAILEGSTQPGVWFPEE  | PPQ             | IAV    | GD   | RELL     | KRASQ  | : 401 |      |         |         |       |       |
| <i>Picea sitchensis</i>          | : | RKAV   | CLY | SHK | KL | SIC  | VGVAIS      | AF   | VRAVLEGNTPQGVWFPEE | PEGIA           | VEAR   | QLL  | ERAAEG   | : 416  |       |      |         |         |       |       |
| <i>Physcomitrella patens</i>     | : | KKAI   | CLF | SHK | ML | SV   | SGMSTAA     | FVRA | LL                 | EGATQPGVWFPEE   | EGGIA  | ESAR | PKLL     | ERAAEG | : 419 |      |         |         |       |       |
| <i>Chlamydomonas reinhardtii</i> | : | KNSS   | CLF | VH  | KY | LS   | QMGYSTAA    | FAQ  | SVLQCKTQPGVWFPEE   | KE--            | ALQ    | DR   | RQFL     | QFAATG | : 422 |      |         |         |       |       |
| <i>Ostreococcus lucimarinus</i>  | : | KQSV   | CLY | TH  | PR | L    | SECVGTCTA   | S    | FATAM              | LN              | CE     | CA   | PGVWFPEE | VE--   | ALSD  | RDAL | FERAKEG | : 427   |       |       |
| <i>Ostreococcus tauri</i>        | : | KQAV   | CLY | TH  | PR | L    | SECVGTCTA   | S    | FATAM              | LN              | CE     | CA   | PGVWFPEE | NE--   | AIAD  | R    | GAL     | FERAKEG | : 419 |       |
| <i>Micromonas sp. RCC299</i>     | : | ALAGAI | YNE | PR  | L  | SEAV | GDATAAF     | CA   | MLR                | CE              | T      | DE   | CGVWFPEE | AG--   | AVK   | DR   | AR      | LL      | EAAV  | : 423 |



```

                                *           500           *
Oryza sativa japonica      : TTI FVMNKPSWMIETDP--KEVGLGIYV-- : 427
Phyllostachys edulis      : TTNFVMNKPSWLVETDP--KEVGLGIYV-- : 418
Hordeum vulgare           : TTNFVMNKPSWMIETDP--KEVILGIYV-- : 420
Triticum aestivum        : TTNFVMNKPSWMIETDP--KEVILGIYV-- : 423
Sorghum bicolor          : TSTFVMNKPSWVVEETDP--KEVGLGIYV-- : 435
Zea mays                  : TSTFVMNKPSWVVEETDP--KEVGLGIFV-- : 433
Aquilegia formosa        : TINFVMNKAPWVVEETEP--KELVFGIFI-- : 428
Populus trichocarpa      : TINFIMNKPPWVVEETDP--KELGLGIYV-- : 431
Ricinus communis         : TINFVMNKPPWVVEETEP--KEVGLGIYV-- : 422
Vitis vinifera           : TINFIMNKPPWVVEETDP--KELGLGIYV-- : 422
Nuphar advena            : TINFVMNKPAWVVEETEP--KELGLGIYV-- : 396
Glycine max              : TFNFIMNRSPPWVEETNP--KEFGLGIYL-- : 429
Arabidopsis thaliana     : TFNFILNKPPWVVEETEP--KEVVLGIYV-- : 428
Solanum lycopersicum    : TINFILNKAPWVVEETNP--KELGFGIYS-- : 430
Helianthus ciliaris     : TINFVMHKAPWVVEETNP--KLVGLGIYV-- : 418
Artemisia annua         : TINFAMHKAPWVVEETNP--KEVGLGIYV-- : 416
Taraxacum officinale    : TINFVMHKAPSMVEETYPNFKEVGFGI---- : 418
Adonis aestivalis HBFD1 : AINFIMKQ----- : 407
Adonis aestivalis HBFD2 : AINFIMKQ----- : 409
Picea sitchensis        : TINFVMNRPPWVVEETNP--KEICFGIYMQ- : 443
Physcomitrella patens   : TINFVMNKSPWMTDKDP--KEICFGIYWE- : 446
Chlamydomonas reinhardtii : CSRTELNRSAWALESEI--KQIGGMIYW-- : 448
Ostreococcus lucimarinus : TSLFALNQAPWVVEESKP--VNLGFGIYWT- : 454
Ostreococcus tauri      : TSLFLLNQAPWVVEESKA--INICMGLYWT- : 446
Micromonas sp. RCC299   : CDNYEIMNKAAWMLESKP--INLGFGIYIEL : 451

```

**Supplemental Figure 5 (below).** Alignment of Selected Members of the Extended Saccharopine Dehydrogenase Family of Enzymes. The polypeptides included in this alignment were chosen so that each clade of the maximum likelihood tree that was produced from this alignment (Figure 10 of the manuscript) included ten examples from a broad diversity of taxa. The alignment was achieved using MAFFT version 6 (Kato and Toh, 2008; <http://mafft.cbrc.jp/alignment/server/>). The G-INS-i strategy was used with the BLOSUM30 scoring matrix, a gap opening penalty of 1.9 and an offset value of 0.1. The output was manually adjusted to optimize the alignment. Residues are in white text on a black background where all 40 of the sequences have the same or a similar amino acid (Blosum35 matrix), and in white text on a dark grey background where at least 50% of the sequences have the same or a similar amino acid. **Note:** A number of the polypeptides in this alignment are hypothetical ones, predicted by genome assembly programs. These gene assemblies have not necessarily been confirmed by sequencing of the corresponding cDNAs and some of them may not be entirely correct. **GenBank Accession Numbers: HBFD and related polypeptides (first 10 sequences):** *Adonis aestivalis* HBFD1, ABK41045; *Arabidopsis thaliana* At1g50450, NP\_564570; *Picea sitchensis*, ABR17787; *Selaginella moellendorffii*, XP\_002960283; *Chlamydomonas reinhardtii*, XP\_001701437; *Ectocarpus siliculosus*, CBN76749; *Phaeodactylum tricorutum* CCAP 1055/1, XP\_002184209; *Nostoc punctiforme* PCC 73102, YP\_001866432; *Synechococcus* sp. PCC 7002, YP\_001734542; *Cyanothece* sp. ATCC 51142, YP\_001805691. **Polypeptides of unknown function group 1 (sequences 11-20):** *Chlamydomonas reinhardtii*, XP\_001690673; *Chlorella variabilis*, EFN50859; *Salpingoeca* sp. ATCC 50818, EGD79814; *Thalassiosira pseudonana* CCMP 1335, XP\_002291038; *Phaeodactylum tricorutum* CCAP 1055/1, XP\_002177453; *Synechocystis* sp PCC 6803, NP\_441234; *Ralstonia pickettii* 12D, YP\_002980505; *Phytophthora infestans* T30-4, XP\_002900027; *Ectocarpus siliculosus*, CBN75169; *Aspergillus niger* CBS 513.88, XP\_001402256. **Polypeptides of unknown function group 2 (sequences 21-30):** *Arabidopsis thaliana* At5g39410, NP\_568564; *Picea sitchensis*, ABR17362; *Selaginella moellendorffii*, XP002962105; *Chlorella variabilis*, EFN54908; *Ectocarpus siliculosus*, CBJ33497; *Thalassiosira pseudonana* CCMP 1335, XP\_002290994; *Salpingoeca* sp. ATCC 50818, EGD83292; *Homo sapiens*; NP\_057086; *Caenorhabditis elegans*, NP\_503576; *Drosophila melanogaster*, NP\_649517. **Sacharopine dehydrogenases (SDH; sequences 31-40):** *Arabidopsis thaliana* At4g33150, AEE86184; *Selaginella moellendorffii*, XP\_002973511 (amino

acids 527-end); *Phaeodactylum tricornutum* CCAP 1055/1, XP\_002179334 (amino acids 270-end); *Thalassiosira pseudonana* CCMP1335, XP\_002286419 (amino acids 566-end); *Phytophthora infestans* T30-4, XP\_002906594 (amino acids 576-end); *Drosophila melanogaster*, AAR82744 (amino acids 520-end); *Homo sapiens*, AAF03526 (amino acids 477-end); *Saccharomyces cerevisiae* S288c, NP\_014448; *Aspergillus niger* CBS 513.88, XP\_001401890; *Salpingoeca* sp. ATCC 50818, EGD80106.

**Reference for Supplemental Figure 5:**

**Katoh, K., and Toh, H.** (2008) Recent developments in the MAFFT multiple sequence alignment program. *Brief. Bioinform.* **9**: 286-298.

Supplemental Data. Cunningham et al. Plant Cell. (2011). 10.1105/tpc.111.086827

```

*          20          *          40          *          60
A. aestivalis HBFD1      : -----MAPVLLGLKPTLSTGSSVVKETNVGSTLAS : 29
A. thaliana At1g50450    : -----MTRALLLQPYRATVRAASSRETQYDGVPEVK : 31
P. sitchensis           : -----MHQFGFIMSAPILWHSPIGRNRNRNGIIWCMVSSSSSERV : 41
S. moellendorffii      : -----MILSSSGLPPPQQPAISCRHCSIVCGASSSL : 32
C. reinhardtii         : -----MRRVANTSRATGARCGAKLVARPCARRAAVHVIC : 35
E. siliculosus         : -----MLRSMTTRRAYQPIGVRCLSPNWFSSRSRSDRTSTHGHRFRC : 43
P. tricornutum         : -----MIAASHYRRTNSDAKVRVLVILYLLICRVASFVSKNTEQSSSCI : 43
T. pseudonana unknown 1 : MEVVDKKTPTITFGPIVFISSLFLGVFPFLLTVLLPLTIVSAPIHFFAALLINGKLFSSFSKA : 60
P. tricornutum unknown 1 : -----MPSPVTQDGRVTVPSVSAATFLATVASLPPWALTVLPLSLFYQAGKVIKPVLPKA : 55

*          80          *          100         *          120
A. aestivalis HBFD1      : PLNK-----TQNSRVLVLGCTGKVCGSTALALS KFS----- : 60
A. thaliana At1g50450    : FSDP-----SRNYRVLVLGCTGRCVCGSTATALS KLC----- : 62
P. sitchensis           : ESIK-----SDNGRVLILGATGRVCGSAARALV KSC----- : 72
S. moellendorffii      : AGPG-----PEKKEVVLIGCTGRVCGSSTARALARVW----- : 63
C. reinhardtii         : ATGP-----VPDKSVVVICGTRVCGSSTAATLL KEF----- : 66
E. siliculosus         : RSTPSGLGAKGDDGGGARGYDKHARVIVVGGSGRVC GSTVRLRQLA----- : 90
P. tricornutum         : SLDN-----LQNKRVLVVGGSGRVC GSCVTQLV L----- : 72
N. punctiforme         : -----MTDRVLILGCRICGSSVAQDLANHT----- : 26
Synechococcus PCC 7002 : -----MVRKLLILGCTGCICQRVAAAIA----- : 23
Cyanothecae ATCC 51142 : -----M-QRVLILGCGCRICSSIAQDIINHT----- : 25
C. reinhardtii unknown 1 : -----MSATAASRPYQVVVWGASGFTERLVAEHLARDY----- : 33
C. variabilis unknown 1 : -----MAPTRAFDVIWVGATGFTERLVAEHLARDY----- : 30
Salpingoeca unknown 1  : -----MAGRTYDVVVFEGATGFTCSLVVEYLARAY----- : 29
Synechocystis unknown 1 : -----MTKPLPYDLIIVGATGFVCGIVCRYLLSHW----- : 30
R. pickettii unknown 1 : -----MPAPDYDVVVFEGATSFVCGIITRYLSEHL----- : 29
P. infestans unknown 1 : -----MS-KRFDVIVYGATGFTCSLVARYLAAES-----E : 29
E. siliculosus unknown 1 : -----MSDSSNKYDVVVFEGATSFAGQLVCEYYLANY----- : 31
T. pseudonana unknown 1 : TSNTIVDRSGDQSI I IAPRESRKYDVVLLGSGTGFTEKLATAYLAKQY-----GACCF : 112
P. tricornutum unknown 1 : EQPRLDTGYHVSDSDILPRRERKYDVVVLGATGFTERLAVRHLAKTY----- : 102
A. niger unknown 1     : -----MESNKQYDLIVLGGTGYTERFCADHIVKNF----- : 30
A. thaliana At5g39410   : -----MNPTQKPEPVYDVVLGASGFTCKYVVRREALKFL----- : 34
P. sitchensis unknown 2 : -----MEDERLDAVILGASGFTCKYVVRVYFLAQL----- : 29
S. moellendorffii unk. 2 : -----MESAAADVILGASGFTCKRVLGEFLRKL----- : 29
C. variabilis unknown 2 : -----MAASRPHDLVVLGATGFTENRICKEVLNLSG----- : 30
E. siliculosus unknown 2 : -----MASRDMDLVLVVGASGFTCAHVCKRLARSV----- : 29
T. pseudonana unknown 2 : -----MTSYPTNRRERFASRSIDVIVHGATGYTERRVVRHLVTKH----- : 40
Salpingoeca unknown 2  : -----MSEAKKTQQPRAVDVIVVFGATGFTCQYVVQYLRGTV----- : 36
H. sapiens unknown 2   : -----MATEQRPFHLVVFVFGASGFTCQFVTEEVAREQ----- : 31
C. elegans unknown 2   : -----ME-ARYDVVVIYGATGVTGKIFETLISCG----- : 28
D. melanogaster unknown 2 : -----MSGDRLDVLIIFGASGFTCKYTVFEAVTVL----- : 29
A. thaliana At4g33150 SDH : -----MT-KKSGVLLLGA-CRVC RPAADF LASVRTISSQWYKTYFG : 40
S. moellendorffii SDH  : -----VVSEYTNLILLGA-CRVC EPTLMYL TENA-----FEDYA : 33
P. tricornutum SDH     : -----VPNISKRLVLGA-CMVSKSVVDLLGRSA----- : 28
T. pseudonana SDH     : -----LGEREQNLLLLGA-GKVASSFAEYLG RSK----- : 28
P. infestans SDH      : -----MAEVSVSSPKRKRKVVCFGA-GLVASPLVEYLSREQ----- : 34
D. melanogaster SDH   : -----MEGSSSDKKVLLVGA-CMV SAPLVEVWLHREK----- : 31
H. sapiens SDH       : -----MG-TRRKVLVLS-GYI SEPVLEYSR DG----- : 27
S. cerevisiae SDH    : -----MG---KNVLLLS-GFVAQPV IDTLAAND----- : 25
A. niger SDH         : -----MPVAGSKVLLLS-GFVTKPTVEVLSKA----- : 27
Salpingoeca SDH     : -----KLLLLGA-GFVAGPCLDYLLRRD----- : 24

```

```

*          140          *          160          *          180
A. aestivalis Hbfd1 : -----PDLRIVIGGRNREKGDAAVSKLGE-----ENSEFVEVNVDS----- : 95
A. thaliana Atlg50450 : -----PELKLIVVGGGRNREKGEAMVAKLGE-----ENSEFSQVDIND----- : 97
P. sitchensis : -----PNVHIVLAGRNREKGAKLAAELGE-----ANTEFYQVSDIND----- : 107
S. moellendorffii : -----PDLQIVLAGRNREKGEIGIASELGE-----AGTKFRAVDLEI----- : 98
C. reinhardtii : -----PNLKVIVAGRSDDSFKAAVERRP-----ELSKAGFORVDITN----- : 103
E. siliculosus : -----GPGLEIVLVGGRSQRNFKVKSVERWRTPGAEDEYDYSVDVKFVELDLGE----- : 137
P. tricornutum : -----RGSQIVVGGTNAEFLSSRKRWQ-SLFPDICEDELEEVDFVALNRER----- : 117
N. punctiforme : -----QAQITITGRSAEFGKAVSLSSG-----GQVQFVVLDLVE----- : 60
Synechococcus PCC 7002 : -----PLGAVIVTGRSGQTAKAL-----QGTFVRLDLEI----- : 52
Cyanotheca ATCC 51142 : -----EAEVITITGRNPQLGMAALERFQ-----DKVQFQVLDLNS----- : 59
C. reinhardtii unknown 1 : ----QPGKVRWAIAGRDAAKLEQRSELA-VRVNNPA--VAAVPIITADAND----- : 78
C. variabilis unknown 1 : ----KTGVKWAIIAGRSQERLEKLRLELS-EQYGSE--LQEVPIIIGDLKS----- : 73
Salpingoeca unknown 1 : ----ATKSLKWAIIAGRNEAKIKDVRASVA-KKLKDET--VNVKVDIIVADAKD----- : 74
Synechocystis unknown 1 : ---ETAAAKNWAIAGRSQAQKIDRLVQSLG-----PQAAHLPTFVVDIKD----- : 71
R. pickettii unknown 1 : --SGDGEALRWAIAGRSEAKILDVKKRALG-----AAGESLPIIVADAAN----- : 71
P. infestans unknown 1 : SALSSPSALKWAVARSEAKITQMKELKDRLEPEVAPELIDAIIPVVVADSGS----- : 81
E. siliculosus unknown 1 : --GASPPTFKWAVARSESKITALKERLA-SEIDSA--ASTLPTIIVADSLD----- : 77
T. pseudonana unknown 1 : LHSWKRRNGKWAIIAGRSKSKLESTLKSIA-KDLGNDE--VLKVDITLIVDTMD----- : 161
P. tricornutum unknown 1 : ---GVNKSVKWAIAGRSEAKIDKVKRELA-DELDIQE--VESLDTIIVDTTR----- : 148
A. niger unknown 1 : ----PTNLKWAIIAGRSLSKLENTAKELK-----NVNPRADDPDILPVQLN----- : 71
A. thaliana At5g39410 : QTPSSSPLKSIALAGRNPTRIITQSLEWAA-RPNPP---PSSVAIITADTSD----- : 81
P. sitchensis unknown 2 : -DRDGGQRINIGIAGRSRSKVAEALRWAA-APSLP---PANIPITHEADVTS----- : 75
S. moellendorffii unk. 2 : ----PEDRKVGIAGRSRQKLEESLSWAL-GHTSEEQRLKSSVPIFEADVHD----- : 75
C. variabilis unknown 2 : ----FSGKWAVAGRDRVKLERLAASLA-GNDG-----NEPSIIVADVAD----- : 69
E. siliculosus unknown 2 : -ADGSWAGVSWGIAGRSRTKLEDKVLAPL-RAEGLAV--PGEESITVVDNSD----- : 77
T. pseudonana unknown 2 : ----PSLNVAICGRNKDKLAVVAEVA-WDDAKK---ASSVFFVSDASKTSGAESAN : 90
Salpingoeca unknown 2 : ----QDKSLAISGRSADKLAALNRKLG-----TNYPVIVADVVD----- : 71
H. sapiens unknown 2 : VDPERSRRLPWAVAGRSREKIQRVLEKAA-LKLGRTPL-SSEVGIITICDIAN----- : 81
C. elegans unknown 2 : ---KFDNYSIAIAGRSEKLEEVLEKLE-KSTGTSL--KTRIGLIVCDSTN----- : 73
D. melanogaster unknown 2 : ----RGLRWGIAGRNREKLEAVLKEMG-AKAKKD---LSQVPIFIADVND----- : 71
A. thaliana At4g33150 SDH : ADSEEKTDVHVIVASLYLKDAKETVEGTS-----DVEAVRLDVSD----- : 80
S. moellendorffii SDH : DTSKPPKQVFHVHVGSLYLEDAKVEGVE-----NALAQIDVMD----- : 73
P. tricornutum SDH : -----NQEITVASENHEEARLTAAFSK-----HDRHVGLGVVN----- : 61
T. pseudonana SDH : -----TNTITVASQYEADAMKTARYAT-----RGKAVTCDSLQ----- : 61
P. infestans SDH : -----GNEVHVVSGLIEREKEMMRKITS-----RRNLIKPHVVNVAE----- : 69
D. melanogaster SDH : -----DVSITVCSQVKEEADRIAQQYA-----GVDSVYLDVNE----- : 64
H. sapiens SDH : -----NIEITVGSMDMKNQLEQIGKKNY-----INPVSMDCIK----- : 59
S. cerevisiae SDH : -----DINVTVACRTLANAQALAKPSG-----SKAHSLDVVD----- : 57
A. niger SDH : -----DVNVTVACRTLESQAQKCEGFK-----NTKAHSLDVVD----- : 60
Salpingoeca SDH : -----DNTITVACRTLESAQELAGDRQ-----RTAAHSLNVKD----- : 57

```

```

*          200          *          220          *          240
A. aestivalis Hbfd1      : --VRS--LESAIE--DVDLVVHAAGPFQQA--EKCTVLEAAHSTRAYVVDVCDNTSISMQA : 148
A. thaliana Atlg50450   : --AKM--LETSIR--DVDLVVHAAGPFQQA--PRCTVLEAAHKKTKAYLDVCDTSMAFRA : 150
P. sitchensis           : --TKA--IAAAD--GVDLVVHAAGPFQRE--EKCTVLEAAHSSKTAVIDVCDDRSMSCLA : 160
S. moellendorffii      : --LNS--VAQAIE--GAKLVVHSAGPFQRK--NRCTVLEAAHETKVPYIDVCDLTHAQLA : 151
C. reinhardtii         : --ADS--VQALLKSTGADLVVHTAGPFQRS--KNYAVLEAAHASGTCYIDVCDTPTAEGA : 158
E. siliculosus          : --AAS--LASALD--GCDLVVHTAGPFQRK--TRPEVLEAAHAAKVPYVDVCDARLATVA : 190
P. tricornutum         : --SES--VQAVLS--GYDLVVHTAGPFQGVNTPNGVIEACVENGVPYIDVCDYCTASAI : 172
N. punctiforme         : --VDK--LQNAIA--NSNLVVIHCAGPFHYR---DTNVLETCTIAQGVNVVDVSDHRSITSKA : 112
Synechococcus PCC 7002 : --LAA--LEKAAI--NHDLVVHCAGPFHRR---DGRVLOTCTIYQCKNYIDVSDHRCLYQKLI : 104
Cyanotheca ATCC 51142  : --QHQ--VKTIVS--KADVVVHSAGPFHYR---NADVLRICIEEGVNVVDVSDQRSITHKA : 111

C. reinhardtii unknown 1 : --APA--VGRVIA--QTQVVLSTAGPFARY---GDNVVAQAWEQGTHTADITGEIPVVKRS : 130
C. variabilis unknown 1 : --QPS--LDSIAS--QTTVMIS TAGPFALY---GTPVVDAAVRSGETHYVDITGEAPVWSKI : 125
Salpingoeca unknown 1   : --APA--LNKMAK--ATKVVVLS TTGPFWKF---GSDLVAACVTSGETSMCDITGESPVVKEM : 126
Synechocystis unknown 1 : --EAA--VTTICS--QTKVVVSTVGPVYALY---GETLVRVCAITGTDYCDLTGGEVQVWQQM : 123
R. pickettii unknown 1  : --EAQ--LRAICA--QTRVVVSTVGPVYALY---GEPVLKVCAESGTDYCDLTGETQVWIKRM : 123
P. infestans unknown 1  : --EES--LAMVQI--QTNVVVSLVGPVKLY---GELLVKVC AENGVHYCDLTGEIVWIEEM : 133
E. siliculosus unknown 1 : --DEA--VGGMVS--QAKVVIITVGPVAHY---GSKVVAACSAACVHCCDLTGESLVVWVGL : 129
T. pseudonana unknown 1 : --RST--LKALVD--NTRAVIT TAGPFVYK-----DITGGEVQVWVWVGL : 197
P. tricornutum unknown 1 : --TSS--MPALVK--QARCVAT TAGPFALF---GSPVVEFC AKFGTHVVDITGESDVKVMA : 200
A. niger unknown 1      : --REE--LHPLVQ--KTRVIVNCVGPVCLY---STPVIEACASNGTHYVDITGETHVVKEL : 123

A. thaliana At5g39410   : --PDS--LRRVCT--QTKLIVNCVGPVRIH---GDPVVSACADSGCDYLDISGEPEFMERM : 133
P. sitchensis unknown 2 : --PPS--LAAICR--RTKLVVNCVGPVRLY---GEPVVSACV EGGVDYLDITGEPGFMEKM : 127
S. moellendorffii unk. 2 : --MAS--LRGICS--KTKLLVSCVGPVRLY---GEPVVAACVEAGIDYLDITGEPEFMERM : 127
C. variabilis unknown 2 : --PAS--LLEMAK--SCRVLITVGPVRFHW---GEPVVKACVEAGTDYLDVCGEPEFIERV : 121
E. siliculosus unknown 2 : --AAA--LRKAVG--RARLCLNCTGPFVRFLL---GESVVSACVDSGTDYIDLCEPEPFQRM : 129
T. pseudonana unknown 2 : DGSQE--LIQVFS--QSKIVITACAGPVQRC---GMPVITAAVASGCDYLDLCEPEQVFDQV : 144
Salpingoeca unknown 2   : --EES--IVVAQI--QARVCLNCVGPVRFV---GEPVVKACAAVGTHTYLDITGEPEFIERM : 123
H. sapiens unknown 2    : --PAS--LDEMAK--QATVVVNCVGPVRFY---GEPVVKACIENASCIDISGEPEFIELM : 133
C. elegans unknown 2    : --EES--MGKVAR--RAKLVNAVGPVRLH---GEAVVKAAVENCANQIDVAGEPEVNIERM : 125
D. melanogaster unknown 2 : --QAS--LLEMAK--KCRIVVNTAGPVRFH---GENVVKCCIESGTHHVDVSGEPEVYMETM : 123

A. thaliana At4g33150 SDH : --SES--ILKYVS--QVDVVLSSLL--PASCH---AVVAKTCTELKKHLVTAS---YVDDE : 126
S. moellendorffii SDH   : --EQQ--LKSQVQ--KVEVVVISLL--PPSFH---ERVAVACIELKKHLVTAS---YVSKD : 119
P. tricornutum SDH       : --DVKRI--SDHIE--SADKVVSSLL--PPPMH---FQV ALDCTKHKIDL----- : 99
T. pseudonana SDH       : --PGDQLKYLIIQ--EADIVVSSLL--PAQMH---PTAAECCI SMKIDLVTAS---YEESE : 108
P. infestans SDH        : --DAAGVVKLCA--EADCVVSSLL--PATMH---TTIAQRCTIQAHTPLVTAS---YVSPE : 116
D. melanogaster SDH     : --STGHLQELCG--RADVVVSSLL--PVS LH---GMVARYCV AEGTHMVTAS---YLNDE : 111
H. sapiens SDH          : --QEEKLGFVVA--KQDLVISLL--PVVLH---PLVAKACTNKVNMVTAS---YITPA : 106
S. cerevisiae SDH       : --DSA--LDKVAI--DNDVVVISLI--PYTFH---PNVVKSAHRTKIDVVTSS---YISPA : 103
A. niger SDH            : --DAA--LDKVAI--QVDLAVISLI--PYTFH---ANVVKSAHRTKKHVVVTS---YVSPA : 106
Salpingoeca SDH         : --SEA--LVAEVQ--KHDIVVISLI--PYTYH---PLVLEAAHKKVKKHVFVSTS---YVSPK : 103

```

```

                *           260           *           280           *           300
A. aestivalis Hbfd1      : K-SFH[KAVAAANVPAITTAGIFPGVSNVIAELVRSARDENT-----EPQ : 192
A. thaliana Atlg50450   : K-SLEAEAIANIPAITTAGIYPGVSNVMAEMVAAARSEDKG-----KPE : 195
P. sitchensis          : K-TFH[KAVAAQVPAITTAGIYPGVSNLMAELVRLARTSSSKETPS-----EPE : 209
S. moellendorffii     : K-SLHNKAVEAGVPALITTTGLYPGVSNIMAAELVRLARESSAGS-----RPR : 197
C. reinhardtii        : KAAVM[KAKAAGVPAIVSGGITPGTSNVMAAHIITSIARAELYDDNWNRYRTPAPGESV-EPK : 217
E. siliculosus         : K-ALN[KAQEAGVSAITISAGIWPFGIDQLMAVEACEMLGGAS-----EVE : 233
P. tricornutum        : KTKLA[KAKESKTPCIISTECWPGVSSLMAKQLLQKSMQAYPDVDQ-----RDI : 221
N. punctiforme        : I-NFS[QAAAAQVTAIINTGIFPGISNSMVRQGVQFD-----KPE : 152
Synechococcus PCC 7002 : K-PLTQAAREAGIIAIVCNAGVFPFGISNSMVRRLGVEQLD-----EPH : 144
Cyanothece ATCC 51142 : I-EQHSAAKTAGVTAIINTGVFPGISNSMVRQGVQVEALD-----KAD : 151
C. reinhardtii unknown 1 : VQRHH[TAKKKGVKILHCCGYDSIPSDMGTFFMMVEYCRDKLGC-----GVS : 176
C. variabilis unknown 1 : IAAVH[EAARVRIIVPCCGFDSIPFDLGAIVLIDHMRKQLGK-----QPA : 171
Salpingoeca unknown 1 : IEKHDATAKANKCRIVSFCGMDVIPSDVGCVVAKHLREKHKC-----GVD : 172
Synechocystis unknown 1 : IQKYEAIAKQSGARIVHCCGFDSIPSDLGVYLLQQQSQRWGE-----PCI : 169
R. pickettii unknown 1 : IDKYEATAQRSARIVHCCGFDSVPSDMGVYFLQQHAMRQWGT-----PVT : 169
P. infestans unknown 1 : TAKYAAIAAKTCAVLVNCCEFSIPSDVTTFLVADRIQKKFNS-----ATS : 179
E. siliculosus unknown 1 : IDKHH[EAERTCAKIVPSCGFDSIPADLGTIMMVEYMKRTHGL-----SPD : 175
T. pseudonana unknown 1 : MQQYESTAQRTCARIVSLCCHDSIPWDLTVRSLSEKLHESCND-----ELV : 243
P. tricornutum unknown 1 : IMKWG[TAQKSGARIVTFCCHDSVPSWDLVSKLQEQALQKEFKD-----DLT : 246
A. niger unknown 1     : ISEYH[ETAKANGAVIIPCVCGLIESAPADLLWATVTKRVREDLSC-----HTR : 169
A. thaliana At5g39410  : EANYH[RAEETGSLVIVSACGFDSIPAEIGLIFNAKQWVSPSPV-----NQI : 179
P. sitchensis unknown 2 : EAAYH[QRAEETGSLVIVSACGYDSIPAEIGLVIFHSKQWKPPSPV-----HSV : 173
S. moellendorffii unk. 2 : RAKYH[QAVDRESLVVIVSACGFDSVPAEFGVIFNTKQWQGSKP-----NSI : 173
C. variabilis unknown 2 : ELLYN[ETAKQAGCYLASAVGFDSVPGDLGVAYTMSLFKPPARC-----TVV : 167
E. siliculosus unknown 2 : TLKFH[EAEEKGVLLMHACAFDSVPAADLGCIFAAKQFVSPAVC-----SSV : 175
T. pseudonana unknown 2 : IISLDRKARSSGVLAISAAAFDCVPAELGALAERELLKQHPG-----AKC : 190
Salpingoeca unknown 2 : EYLYD[QARQTGATIIISACGFDSIPADLGTIFTYKQFTNGQIP-----SSV : 169
H. sapiens unknown 2  : QLKYH[KAADKGVYIIGSSGFDSIPADLGVITYTRNKMNGTL-----TAV : 177
C. elegans unknown 2  : EAKYGMMAKNNVYIVSACGWDSPADFGVKLLKRYFDGHL-----QRI : 169
D. melanogaster unknown 2 : QLRYDQLAREKGVYIVSACGFDSIPADMGVVFEKFNFDGVV-----NSV : 167
A. thaliana At4g33150 SDH : TSMLH[KAKSAGITIIIGEMGLDPCIDHMMAMKMIINDAHIKKGVKSFTSYCGGLPSPAAA : 186
S. moellendorffii SDH  : MALLDSRAQAAGVTLICEMGLDPCIDHMMAMKMIIDASHERGDKVRFVESYCGGLPSPAAA : 179
P. tricornutum SDH     : -----GRAKEAGVITINNESGLDPLDGHMSAMKKIDDILSRGGRVTVFASVCGGLPSPAAA : 154
T. pseudonana SDH     : MRALCSSAEAEAGIAIINEMGLDPCVDHMSAMKIIDDVHERGGEITSFSSVCGGLPSPAAA : 168
P. infestans SDH      : MKELDARAKKAGIPIICEIIGLDPCMDHMSAMKVIDEVKALSGKVMTFSSVCGGLPAAPEAA : 176
D. melanogaster SDH   : ISGLH[EAKAKGVTIMNEVGLDPCIDHLLALECIEHVQDKGAVVESFVSYCGGLPAAPEHS : 171
H. sapiens SDH       : IKELEKSVEDAGITIIIGELGLDPLDGHMLAMETIDKAKEVGATIESYISYCGGLPAAPEHS : 166
S. cerevisiae SDH    : IRELEPEIVKAGITVMNEIIGLDPCIDHLYAVKTIDEVHRAGGKLSFSLSYCGGLPAAPEDS : 163
A. niger SDH         : NMELD[ECKKAGITVMNEIIGLDPCIDHLYAVKTISEVHAEGGKITSFSLSYCGGLPAAPECS : 166
Salpingoeca SDH      : MASFDQAAKDAGITVMNEIIGLDPCIDHLYAVKTIIDEAHEEGSKVLEFTSYCGGLPAAPEAS : 163

```

|                           |   | *            | 320          | *         | 340          | *                           | 360                     |       |
|---------------------------|---|--------------|--------------|-----------|--------------|-----------------------------|-------------------------|-------|
| A. aestivalis HBFD1       | : | R-LRFSYFTAG  | SGGAC        | -----     | PTSLVTSFLL   | -----                       | -----                   | : 217 |
| A. thaliana Atlg50450     | : | K-LRFSYFTAG  | TGGAC        | -----     | PTTLATSFLL   | -----                       | -----                   | : 220 |
| P. sitchensis             | : | R-LRFSYFTAG  | SGGAC        | -----     | PTTLATSFLL   | -----                       | -----                   | : 234 |
| S. moellendorffii         | : | E-LRFSYFTAG  | SGGVG        | -----     | PTTLATSFLL   | -----                       | -----                   | : 222 |
| C. reinhardtii            | : | W-LRYSYFTAG  | SGGAC        | -----     | PTTLETSTFLL  | -----                       | -----                   | : 242 |
| E. siliculosus            | : | S-IDFSAYTAG  | TGNAC        | -----     | PTTLLSATFLI  | -----                       | -----                   | : 258 |
| P. tricornutum            | : | S-VKFSYFTAG  | SGGAC        | -----     | VTLVATFLI    | -----                       | -----                   | : 246 |
| N. punctiforme            | : | N-IHLVYLVSG  | SGGAC        | -----     | ITVMRTTFLG   | -----                       | -----                   | : 177 |
| Synechococcus PCC 7002    | : | Q-IELYVGVAG  | SGGAC        | -----     | ETVLTITFLG   | -----                       | -----                   | : 169 |
| Cyanotheca ATCC 51142     | : | E-IKLSYIVAG  | SGGAC        | -----     | ITVMRTTFIG   | -----                       | -----                   | : 176 |
| C. reinhardtii unknown 1  | : | Q-AYSLVGPGR  | AGVSG        | -----     | GTLSEGMNLI   | -----                       | MNESVSELSELNSNHFTGEGA   | : 222 |
| C. variabilis unknown 1   | : | K-VLNAVMSK   | GGVSG        | -----     | GTLASGMNAI   | -----                       | SEMNSNPALKASARDVYSLV--  | : 216 |
| Salpingoeca unknown 1     | : | H-INSYILAMK  | GGVSG        | -----     | GTLASMFNFF   | -----                       | EQPNFAELRKEMGSPYELIPR   | : 218 |
| Synechocystis unknown 1   | : | R-VKLVGKACQ  | GCISG        | -----     | GTLASGINLI   | -----                       | QEAIADPSTRQALRNPIILCFK  | : 216 |
| R. pickettii unknown 1    | : | Q-VKLRVKTLK  | GCASG        | -----     | GTVASLVNVV   | -----                       | QEAAAADPALRRELADPYALCPR | : 216 |
| P. infestans unknown 1    | : | T-VDLYTTEFK  | GEASG        | -----     | GTLASVFAVM   | -----                       | ETSTSKQLLASRNPFFLTDE    | : 224 |
| E. siliculosus unknown 1  | : | D-VRYVVGASK  | GGVSG        | -----     | GTLASVLDLF   | -----                       | EQVWSSGKAITSKLADPLLLT-- | : 221 |
| T. pseudonana unknown 1   | : | S--VECLNEMK  | GDVSG        | -----     | GTLATVYESI   | DRGIWFEFEWKSILPSSTLDVYKRLPD |                         | : 293 |
| P. tricornutum unknown 1  | : | S-VTFWDEAV   | GGAPG        | -----     | GTLATLFSAV   | -----                       | DGKSVKAPHADFPFLRLMN     | : 290 |
| A. niger unknown 1        | : | S-ITGDIHEIKS | SCASG        | -----     | GTLSTVLTFF   | -----                       | ENVPPSEMRLKISTPFALAAA   | : 215 |
| A. thaliana At5g39410     | : | E-AYLSLES DK | KIAG         | -----     | NFGTYESAVLGV | -----                       | ANAEKLLKELRRSRPRRPR     | : 223 |
| P. sitchensis unknown 2   | : | D-SYLALES DK | RIVG         | -----     | NIGTFQSAVLGV | -----                       | ANVHDLQKLRRRSRPRRAK     | : 217 |
| S. moellendorffii unk. 2  | : | D-AYTLR SST  | RMKG         | -----     | NFAIFESAVLGI | -----                       | ASVGELQKLRKSRPIKSP      | : 217 |
| C. variabilis unknown 2   | : | E-TA TIRGGP  | SGFKG        | -----     | HYPTYESAVHGF | -----                       | ASAGELRKLKKEAEQ--       | : 209 |
| E. siliculosus unknown 2  | : | S-SFYTLNVGP  | SGYSG        | -----     | HATTFEAAVHGF | -----                       | GSAADLRKVRKEVQAKFP      | : 220 |
| T. pseudonana unknown 2   | : | A-GVEVIHTMQ  | NVSGA        | -----     | NATTFHAAVDGF | -----                       | YAASSGELAASRKKVKESYP    | : 237 |
| Salpingoeca unknown 2     | : | E-SFTQIKSGE  | AGTKV        | -----     | HFAIFESAVHGF | -----                       | ASAGELRDLRRKKGKVTV      | : 214 |
| H. sapiens unknown 2      | : | E-SFTTIHSGP  | ECLSI        | -----     | HDGTFWKSAYGF | -----                       | GDQSNLRKLRNVSNLKP-      | : 221 |
| C. elegans unknown 2      | : | D-AFLQLHFGP  | SGYSF        | -----     | SATSLQALLGF  | -----                       | NGAPDLGSLRHSIMPKKI      | : 214 |
| D. melanogaster unknown 2 | : | E-TFLETGIKE  | GCSCG        | GTAGLNYG  | TWESAVYGL    | -----                       | AHSDLRGIRKQIYPQR-       | : 216 |
| A. thaliana At4g33150 SDH | : | N-NPLAKKFSW  | NPAGAIRAGQNP | AKYKSN    | GDII         | -----                       | HVDGKNLYDSAAFVFRPNLP    | : 238 |
| S. moellendorffii SDH     | : | N-NPLAKKFSW  | NPTGAIKAGR   | NAAYKHEN  | KI           | -----                       | RVPGERLFGAAVSRFIPQYP    | : 231 |
| P. tricornutum SDH        | : | D-NPLKPKFSW  | SPKGV        | IQTSDARYR | WEGQVL       | -----                       | QVHGSDLLAAAAPFLH-AWP    | : 205 |
| T. pseudonana SDH         | : | NHNPLLYKFSW  | SPMGVMKASQ   | NAAYVRKDN | QLV          | -----                       | VIDGADLLASAEPFD--AWK    | : 219 |
| P. infestans SDH          | : | D-NALCYKFSW  | SPRGVLTAA    | LNAAYR    | KDGKVI       | -----                       | NVAGEDLLNRSERVN--FLP    | : 226 |
| D. melanogaster SDH       | : | N-NALRYKFSW  | SPRGVLLNT    | LSAAKYL   | SQQQIV       | -----                       | EISGGELMSSPRSLD-FLP     | : 222 |
| H. sapiens SDH            | : | N-NPLRYKFSW  | SPVGVMNVM    | QSAAYLLD  | GKVV         | -----                       | NVAGGISFLDAVTSMD-FFP    | : 217 |
| S. cerevisiae SDH         | : | D-NPLCYKFSW  | SSRGVLLAL    | RNSAKY    | WKDGKIE      | -----                       | TVSSEDLMATAKPYF--IYP    | : 213 |
| A. niger SDH              | : | N-NPLCYKFSW  | SSRGVLLAL    | RNAAKFY   | KDQGEF       | -----                       | SVAGPDLMATAKPYF--IYP    | : 216 |
| Salpingoeca SDH           | : | N-NPLCYKFSW  | SARGVLLA     | AGNSCKY   | FEHGKVV      | -----                       | EIEAPYVLSKGVNRIN-IYP    | : 214 |



```

*           380           *           400           *           420
A. aestivalis Hbfd1 : -----LGEENVAYSEGEK|ELKPYTGKLNID|FGKGVGKRDVYL----- : 255
A. thaliana Atlg50450 : -----LGEENVAYKQGEK|KLRPYSGMITVD|FGKGIRKRDVYL----- : 258
P. sitchensis : -----LREEVIAYRKGEFFRAKPYSGVLDID|FGKGVGKRSVYL----- : 272
S. moellendorffii : -----LSEQVLTYSKGVK|KLDPPFSGERIVD|FGKAVGKRSVFL----- : 260
C. reinhardtii : -----AGEDVIVYKDNKE|VLPPIISNRREVDF|GPGVGRKGVYL----- : 280
E. siliculosus : -----LCEKVLGFKDGNEL|FHEPASGFKKVD|FGQSIGEKTRGMC|PAAWLTS-- : 305
P. tricornutum : -----LAEKALTVVNGRRKVVTPMETYSTVH|FGPVVGDKEVAH----- : 284
N. punctiforme : -----LQYPFETWIDGKQV|IKPYSERELVE|FPPPYGRSCVYW----- : 215
Synechococcus PCC 7002 : -----LGEPLVLFQGGTQWAKQ|PYSKPTIID|FPAPIGKTTVYW----- : 207
Cyanotheca ATCC 51142 : -----IQQPFPAWIDNRWQ|TIKPYTGRECLD|FGKPYGKAHVYW----- : 214
C. reinhardtii unknown 1 : ARE-----GLPKGPDPRPAGLL|PRWLPAAARTWAGF|FIMEGCNAK|IVQASHAL|RDS-- : 272
C. variabilis unknown 1 : -----PEEAHGSDEGFVG|EWCPELGKYLAP|FVMQVNNR|VVHRSNYLNKYD-- : 263
Salpingoeca unknown 1 : -----DGRPSIRQPDANA|SYEEEVQRYTTP|FVMAGVNSK|IVHR|NYLN|NHI-- : 265
Synechocystis unknown 1 : -----PDHRSDHPPSLIP|VQNDPIFSGWTAP|FVMAGINTP|IVLRSNTLQNEV-- : 263
R. pickettii unknown 1 : -----GHGFTARQSRVGA|AFDADFNVWIAP|FVMAAINNER|VVHRSNALS|GNA-- : 263
P. infestans unknown 1 : : KTIAEKQ---QAGLVAPNTSGIA|KYDTAMGFWHS|LFIIGGSVNQAVVHRS|NYR|KNK-- : 278
E. siliculosus unknown 1 : -----ATPGFGKAADPGG|GYDSLAKSWTASSVFASHDSK|IVFRSAGL|G--- : 266
T. pseudonana unknown 1 : : GCESTFS---VSSDLPTVTS|PCRNPATRFVNRWCGF|FVMAAINMD|VVGRSISLSKHG-- : 347
P. tricornutum unknown 1 : : GEKSEYVCRS---KDPTWIHKS|KSPWDDTGAWFGRWTP|FIMAQVNGA|VVRWSHALREQG-- : 347
A. niger unknown 1 : : PPP-----KDI PREPLWTRLLG|IRSVRDLGILTT|SPSGLADIT|TVHRSSTL|PEF-- : 265
A. thaliana At5g39410 : -----PTICGPPA-KGPT|ENQKTIGLWALKL|--PSADAVVRR|LTT|TEKPH : 269
P. sitchensis unknown 2 : -----PQIPGPPARKAKL|EHISSIGLWALKL|--PSSDAI|VRR|QTF|AEDPQ : 264
S. moellendorffii unk. 2 : : R-----LQIPGVPL-KRPA|HWEDAVNSWAVKI|--PSSDAV|VRR|LAT|AENPD : 264
C. variabilis unknown 2 : -----ARADASV|VRR|SMQR|VEA-- : 227
E. siliculosus unknown 2 : : PSQIP-----RVGARPVERGG|PFYEQTPGLEAYCFK|F--PGADSA|VVRST|QNS|LAGRGE : 272
T. pseudonana unknown 2 : : EFQETMPPSRPK|EWPKIPETPGLMPGHNEGLGLR|TLKF--VGADASA|IRS|SWRY|RSR-- : 293
Salpingoeca unknown 2 : -----PVVGRKLRPGML|PEWREDGHGYCIP|F--PGSDA|S|VRR|SQY|QAH-- : 259
H. sapiens unknown 2 : -----VPLIGPKLKRWP|SYCRELKGYSIP|F--MGSDVS|VRR|QRY|YEN-- : 266
C. elegans unknown 2 : : D-----HLLAPNKKRH|FLWKLEEKGESEGWAMP|F--LGADKS|IVTR|SQYFDYVM-- : 260
D. melanogaster unknown 2 : -----LPRFYPFLKPRPL|FRSTEVDKVC|LFP--PGSDRS|V|VMS|QRF|YDQ-- : 261
A. thaliana At4g33150 SDH : : AFALECF---PNRDSL|VYGEHYG|E|SEATTIFRG|TLRYEGF|SMIMATLSK|LGF|FSEAN : 294
S. moellendorffii SDH : : AYALEVL---PNRDSL|MYGDLYG|S|QEAA|TIFRG|TLRYEGF|GQ|IMDTL|GK|LGY|NSDNH : 287
P. tricornutum SDH : : KLGLECL---PNRDSL|RYEHIYNI|G-----GAKATL|RYRGF|SSCSYGL----- : 245
T. pseudonana SDH : : SLNLECI---PNRDSL|VYGEKYG|E-SAA|TIFRG|TLRYQGF|SSLLH|V|LKN|MGL|DNKG- : 273
P. infestans SDH : : AFNIEQI---PNRNSL|PYGDIYG|P-EAHS|LYRGT|LRYGGCC|Q|LYQLR|KLGL|FMDMP- : 280
D. melanogaster SDH : : GFALEGF---PNRDS|TKYGNLYG|GRDVHT|LLRGT|IRYKGF|SES|IKPM|QLL|LGL|DPEPH : 278
H. sapiens SDH : : GLNLEGY---PNRDS|TKYAEIYG|S-SAHT|LLRGT|LRYKGYM|KALNGFV|KLGL|NREAL : 272
S. cerevisiae SDH : : GYAFVCY---PNRDS|TLFKDLYH|P-EAET|VIRGT|LRYQGF|PEFV|KALV|DMGM|KDDAN : 268
A. niger SDH : : GFAFVAY---PNRDS|CPYRERYN|P-EAQ|TVVRGT|LRYQGF|PEMIK|V|LVD|IGF|SDEGR : 271
Salpingoeca SDH : : AFAFEGY---PNRDS|TPYEERYN|P-ECLT|ILRGT|LRYKGT|PLL|VQSLA|LVGF|NDHPQ : 269

```

|                           | * | 440         | *         | 460         | *            | 480            |                 |                 |                |                 |         |              |       |
|---------------------------|---|-------------|-----------|-------------|--------------|----------------|-----------------|-----------------|----------------|-----------------|---------|--------------|-------|
| A. aestivalis Hbfd1       | : | -----       | WNLPEVRS  | SGHEIL      | -G           | PTVSARFGTAPFFW | : 284           |                 |                |                 |         |              |       |
| A. thaliana Atlg50450     | : | -----       | LNLPEVRS  | STHEVL      | -G           | PTVVARFGTAPFFW | : 287           |                 |                |                 |         |              |       |
| P. sitchensis             | : | -----       | LNLPEVGS  | STHEVL      | -G           | PTVSARFGTAPFFW | : 301           |                 |                |                 |         |              |       |
| S. moellendorffii         | : | -----       | INLPEVTT  | AHEIL       | -N           | PNVTAKFGTAPFFW | : 289           |                 |                |                 |         |              |       |
| C. reinhardtii            | : | -----       | YNLPEVVS  | SGHKYM      | -R           | PDVSARFGTDPFIW | : 309           |                 |                |                 |         |              |       |
| E. siliculosus            | : | -----       | TSGRCRCER | QGSVVLVASFT | CNQVL        | -G             | PNISTYFSGTSPPEW | : 347           |                |                 |         |              |       |
| P. tricornutum            | : | -----       | LNLLETAS  | SVADVL      | -R           | GNVQALFGTAPNFW | : 313           |                 |                |                 |         |              |       |
| N. punctiforme            | : | -----       | FDMPETFT  | TLKAFPS     | V            | KTVITKFGSVPDFY | : 245           |                 |                |                 |         |              |       |
| Synechococcus PCC 7002    | : | -----       | FDVAETFT  | FAESF       | -P           | ETVVTKFGSLPNFY | : 236           |                 |                |                 |         |              |       |
| Cyanotheca ATCC 51142     | : | -----       | YDMPETT   | LQETF       | -S           | DSVITKFGSVPDFY | : 243           |                 |                |                 |         |              |       |
| C. reinhardtii unknown 1  | : | -----       | AAPLEYGK  | DFKFT       | EMIAAS       | -----          | GAVGAS          | -L              | SAGTMVAGAVLGLA | : 313           |         |              |       |
| C. variabilis unknown 1   | : | -----       | GGSTLRY   | QEAVAAK     | -----        | SWLAAK         | -S              | QLGTLAVVGAMQS   | : 300          |                 |         |              |       |
| Salpingoeca unknown 1     | : | -----       | YGPFRY    | REKNT       | VKGDGWS      | SWLSCW         | -L              | TTLGLGAFSVGAYFS | : 306          |                 |         |              |       |
| Synechocystis unknown 1   | : | -----       | YGEFQY    | EEGIL       | TGPGII       | -G             | WLAAQ           | -G              | KWSLDLMALAIG   | : 303           |         |              |       |
| R. pickettii unknown 1    | : | -----       | YGNPFL    | YDEAVIT     | GAGLS        | -G             | RMKAM           | -T              | VAGLAAFMLGIVIK | : 303           |         |              |       |
| P. infestans unknown 1    | : | -----       | YGDKFVY   | HERMAIG     | -----        | GLFMQL         | -L              | ATFGTIVVSMILYFG | : 314          |                 |         |              |       |
| E. siliculosus unknown 1  | : | -----       | YPETFRY   | KEVMG       | FKGLLK       | -G             | FLPAV           | -F              | STIAFGIGGLMVIP | : 306           |         |              |       |
| T. pseudonana unknown 1   | : | -----       | NPTVTY    | REAAVQE     | -----        | SFMDAF         | -S              | VWFGTIVLGTLIINP | : 382          |                 |         |              |       |
| P. tricornutum unknown 1  | : | -----       | SKSLTY    | TEFAVTK     | -----        | DFKTAF         | -V              | NHVGLIIVGSMMLNP | : 382          |                 |         |              |       |
| A. niger unknown 1        | : | -----       | YGPRFY    | FRQLRAR     | -----        | NAFTGI         | -L              | WHYAFLFAVTALLLP | : 301          |                 |         |              |       |
| A. thaliana At5g39410     | : | GLPGINESPE  | QIQKREAF  | WSSIKPA     | -HFGVKITSK   | --             | SLFGIF          | -R              | VTLGVSLGLLSKFS | : 325           |         |              |       |
| P. sitchensis unknown 2   | : | GLPGVNENS   | DFAEKRKN  | FWSEVKPL    | -HYGVYIGYK   | --             | SLLSVA          | -G              | TIFTGLNVLLGSFG | : 320           |         |              |       |
| S. moellendorffii unk. 2  | : | GLPTASKHQ   | EQSLRQ    | --          | WTDIKPV      | -LFGVYLSVK     | --              | ELWRVC          | -F             | LLTGFILYVLANFG  | : 317   |              |       |
| C. variabilis unknown 2   | : | -----       | QPAANVS   | VVFTLP      | -----        | SRYLYT         | -L              | WQGFSGMFQFLAGK  | : 263          |                 |         |              |       |
| E. siliculosus unknown 2  | : | G-----      | AGLCP     | --          | HYSAYFTAG    | --             | QLWGAT          | -Q              | TLFGVVFQTLAKSG | : 309           |         |              |       |
| T. pseudonana unknown 2   | : | -----       | VPEHARK   | GKNVPE      | RLSVLMGMSK   | DTMSAA         | -K              | IVYGATFSTLAQFK  | : 340          |                 |         |              |       |
| Salpingoeca unknown 2     | : | -----       | GAEVQP    | V           | QYAAWFS      | SLP            | --              | SGFWTG          | -V             | MAAGTVFGALANFS  | : 297   |              |       |
| H. sapiens unknown 2      | : | -----       | LEESPV    | -QYAAV      | VTVG         | --             | GITSVI          | -K              | MFAGLFFLFFVRF  | : 303           |         |              |       |
| C. elegans unknown 2      | : | -----       | NNVKPV    | -RFTP       | TRFE         | --             | SRWNAL          | -L              | AALMGLLKTFSKYG | : 297           |         |              |       |
| D. melanogaster unknown 2 | : | -----       | DKKRPV    | -QM         | QAYVGF       | S              | --              | SWLVAG          | -G             | VIFFATIFGLLSKFK | : 298   |              |       |
| A. thaliana At4g33150 SDH | : | QVL-STGKRIT | FGALLSNIL | NKDADNE     | SEPLAGEEEI   | SKRI           | IKLGH           | SKETA           | AAKA           | AKTIVF          | : 353   |              |       |
| S. moellendorffii SDH     | : | PLL-ASSTET  | TYAAVLE   | ALILQL      | STSYNGLCAEEL | ARIIS          | -----           | SDNLD           | VAKR           | VLSCIRF         | : 342   |              |       |
| P. tricornutum SDH        | : | -----       | FCLRD     | QRGGS       | LNVED        | FILACV         | -----           | ADNF            | DEAV           | AVLDTLIW        | : 282   |              |       |
| T. pseudonana SDH         | : | -----       | TGAVSWY   | DALDDL      | RKQGGH       | ADLRK          | FVLACA          | -----           | GGDR           | DLGLRAYNCLSW    | : 319   |              |       |
| P. infestans SDH          | : | -----       | SKPIP     | ATWPD       | LLTQL        | GGFQGLRE       | -----           | -----           | -----          | DAHGF           | LQW     | : 311        |       |
| D. melanogaster SDH       | : | ALLHPSG     | PDVTWR    | QVLVI       | HLMGMSD      | STIFYENL       | -----           | KQKL            | TERIG          | DVDGIES         | : 326   |              |       |
| H. sapiens SDH            | : | PAFRPEAN    | PLTWK     | QLLCD       | LVGIS        | SPSSEH         | DLKEAV          | -----           | LKKL           | GGDNT           | QLEAAEW | : 323        |       |
| S. cerevisiae SDH         | : | EIF---      | SKPIA     | WNEAL       | KQYL         | GAKST          | SKEDLI          | ASID            | SKAT           | -----           | WKDDED  | RERILSGFAW   | : 320 |
| A. niger SDH              | : | EYL---      | NTPIA     | WKEAT       | KQIL         | GATSSA         | EKDLE           | WAI             | ASKTA          | -----           | FANND   | DRDRIISGLRW  | : 323 |
| Salpingoeca SDH           | : | DYLQPT      | APDMA     | WKDVL       | AKML         | GCTND          | -EAS            | LAKAAA          | ERAG           | -----           | IRDH    | PEERRIISAMKW | : 323 |

|                           |   | *     | 500     | *    | 520   | *   | 540                      |                          |
|---------------------------|---|-------|---------|------|-------|-----|--------------------------|--------------------------|
| A. aestivalis HBFD1       | : | NWAM  | AMTT    | LEPP | GILDR | NRN | KIGMLANFVYPSVQIFDGI      | AGECLA----- : 329        |
| A. thaliana Atlg50450     | : | NWGME | MTKLL   | EPS  | EVL   | RDR | TKVQQMVELFDPVVRAMDGF     | ACERVS----- : 332        |
| P. sitchensis             | : | NWAMS | AVVN    | AEV  | EFL   | KDR | NKVQTLVQLSDPLVRAIDIF     | SGELMS----- : 346        |
| S. moellendorffii         | : | NWLMS | QIAG    | ---  | EFL   | EDY | SKVESFARLSDPAVRAIDVL     | VGGKVS----- : 331        |
| C. reinhardtii            | : | NWAMW | TAR     | VPR  | SLL   | NRN | RFVKQFAKLSDPFVRNVDKI     | IGEAVA----- : 354        |
| E. siliculosus            | : | NYLLK | GMT     | LLPD | SIM   | GNR | DLMQALAEFSEPLVRITDKL     | VGATNA----- : 391        |
| P. tricornutum            | : | NCLLG | MA      | KLET | QLLE  | NED | LMRKLQSMFSLPIVRLVDAF     | ACATNA----- : 357        |
| N. punctiforme            | : | NHLTW | AAH     | FEK  | WLM   | QRR | YMIIEFSLHVSMSMTDVTNNF    | SGIGVA----- : 290        |
| Synechococcus PCC 7002    | : | NQLTR | AMT     | LLPE | SLR   | QH  | PRIIQQLSKIGYGMTKLTDSF    | TGVGVA----- : 280        |
| Cyanotheca ATCC 51142     | : | NYATW | MAH     | GLE  | E     | KVL | KSPKTVEFLAQVSHVMTDVSDRF  | TGTGVA----- : 288        |
| C. reinhardtii unknown 1  | : | PLRAV | ARR     | FLPA | ---   | PGQ | QPSSEDEVQRNGFWTHDL       | VAVTDE----- : 350        |
| C. variabilis unknown 1   | : | WMHPL | LKK     | LEPA | ---   | PGE | QPSRETMMTGYFKNRV         | VGWTKE----- : 337        |
| Salpingoeca unknown 1     | : | PTRNL | LRR     | MLPK | ---   | PGE | QPDDEHTRETGKLVMR         | YGVGDS----- : 343        |
| Synechocystis unknown 1   | : | PSRWL | LQ      | LEEK | ---   | PGE | QPTTEEAQQQGFYDLRF        | WGETAS----- : 340        |
| R. pickettii unknown 1    | : | PARIV | MQRF    | LEPK | ---   | PGE | QPTPAAQLAGRYDLRL         | FGRTDQ----- : 341        |
| P. infestans unknown 1    | : | WTRAL | LKR     | LARA | ---   | PGQ | QPSSEESMLQGYFVAEA        | ACYTDD----- : 351        |
| E. siliculosus unknown 1  | : | VTRKF | LAK     | FLPA | ---   | PGE | QPSKELRDSGYFWIN          | LASGRS----- : 344        |
| T. pseudonana unknown 1   | : | ITRPL | VKR     | ALEQ | ---   | PGQ | QPSSETVRKEGYLCVTG        | YGVGAE----- : 419        |
| P. tricornutum unknown 1  | : | LTSGL | LKKY    | VFEK | ---   | VGE | QPSMKNMEDKHLYCIFGEG      | IGIGIN----- : 421        |
| A. niger unknown 1        | : | PIRTL | VRYK    | YTP  | ---   | GT  | PTLEDSVNDVFVEYRA         | VATADQ----- : 338        |
| A. thaliana At5g39410     | : | FCRWL | LK      | FEPS | VFSL  | GW  | FQKKQPSSEEEVESATFKMWF    | IGRGYS----- : 368        |
| P. sitchensis unknown 2   | : | WCRSL | LK      | YEP  | IFTL  | GL  | FKKTEPTTEEEVKSATFKMTF    | LGHGYS----- : 363        |
| S. moellendorffii unk. 2  | : | WCRKL | LS      | YEP  | VFT   | GG  | VFSKTEPSQEEIDNSSFSMVF    | VGRGFK----- : 360        |
| C. variabilis unknown 2   | : | WCRSL | LQ      | YER  | LFTY  | GM  | FSHEPSEERQLSEASFQFTN     | LAKGYS----- : 306        |
| E. siliculosus unknown 2  | : | WCRNL | LLN     | NVG  | AFSR  | GL  | FSHEPTEEDQMNETSFEMTF     | LAKYSTPPTAAEPPATPA : 365 |
| T. pseudonana unknown 2   | : | WCDDV | LHN     | YEP  | AFSG  | GV  | FTSKQOSEEEELQNAKFTTYV    | TAYGSN----- : 383        |
| Salpingoeca unknown 2     | : | FCRSL | LK      | FEP  | LFTL  | GV  | FTHDTEPTTEEQMRATSFEMNF   | VAKGYT----- : 340        |
| H. sapiens unknown 2      | : | ICRQL | LK      | FPW  | FFS   | FG  | YFSKQTEPTQKQIDAASFTLTF   | FGQGYG----- : 346        |
| C. elegans unknown 2      | : | TMQR  | FTMR    | YEP  | LCS   | GK  | LFSKSEPSSEEQMKEATFTYQF   | YCYGYG----- : 340        |
| D. melanogaster unknown 2 | : | LCRT  | LLN     | YEP  | LFS   | G   | LARSSEPSSEESMERTYFKMTF   | KASGWL----- : 341        |
| A. thaliana At4g33150 SDH | : | LG    | FNEERE  | VPSL | CKSV  | F   | DFATCYLMEEKLAYSGNEQDMVL  | LHHEVE----- : 398        |
| S. moellendorffii SDH     | : | LG    | LDSQEI  | VPR  | SCKS  | A   | FEVLCSRMEEKLVRANEQDLVL   | LHHELE----- : 387        |
| P. tricornutum SDH        | : | LG    | VLP     | GHIP | VSG   | SN  | IVEAFNFLEDKLRKYESESDMVL  | MHHIE----- : 326         |
| T. pseudonana SDH         | : | LG    | LKEHTP  | VSEP | SSI   | A   | KSFCDVLQHLQFEEGERDMVL    | MHHDIR----- : 363        |
| P. infestans SDH          | : | LC    | AFDKSNP | VKA  | PSIL  | D   | AFCALLQDKLSYQPGERDMAI    | MHHEFG----- : 356        |
| D. melanogaster SDH       | : | LG    | LDDTPV  | VKL  | NTPL  | D   | TLSHYLSKRLAFERDERDLVV    | LRHEVG----- : 370        |
| H. sapiens SDH            | : | LG    | LGD     | EQV  | PQA   | ES  | ILDALSKHLVMKLSYGPEEKDMIV | MRDSFG----- : 367        |
| S. cerevisiae SDH         | : | LG    | LFS     | DAK  | IFER  | GN  | ALDTLCARLEELMQYEDNERDMVV | LQHKFG----- : 364        |
| A. niger SDH              | : | IC    | LFS     | DEQ  | IFER  | GN  | PLDTLCATLEKKMQYEEGERDLVM | LQHKFE----- : 367        |
| Salpingoeca SDH           | : | LG    | LFS     | DDV  | CPK   | V   | SLLSLAHTLADKCAYPGERDMIM  | LQHKFR----- : 367        |

```

*           560           *           580           *           600
A. aestivalis Hbfd1 : -----MRVDLE---CANGRNTFGILS-----HERLSVLVETSTAV : 361
A. thaliana Atlg50450 : -----MRVDLE---CSDGRITTVGIFFS-----HKKLSVSVGVSTAA : 364
P. sitchensis : -----MRVDLE---CMDGRKAVGLYS-----HKKLSICVGVATISA : 378
S. moellendorffii : -----MRVDLD---CKDGRSTGTYT-----HPDLSVCAQAATAA : 363
C. reinhardtii : -----MRVEVD---MVGKKNSSGTFV-----HKYLSQSMGYSTAA : 386
E. siliculosus : -----MRLEAV---AKDGRKAVLNVA-----HEDLEVCVGLATAA : 423
P. tricornutum : -----MRCDISNTKNPDLFRCSAIIYA-----HKNLEPCVCECVTA : 392
N. punctiforme : -----VRSEVTGQKDGKTAVYCSTVV-----HENTALASGCGTGS : 325
Synechococcus PCC 7002 : -----MRAIVSGIKDATPQQVTVDFV-----HEHTAIAAGLGVAL : 315
Cyanotheca ATCC 51142 : -----MRCDVKGYGSEGAHHYISTFS-----HESASVAAGMGTGS : 323
C. reinhardtii unknown 1 : -----EKPRVVRGKCGD-----RRDPGYWSTSRMLLE : 377
C. variabilis unknown 1 : -----EGGAQPSVVQAEVAD-----PHRDGGYWGTSRMLLE : 368
Salpingoeca unknown 1 : -----AAKPKAVATFVTH-----HDPGYAETATMLAE : 370
Synechocystis unknown 1 : -----GQSTMVKVTGD-----QDPGYGSTAKILAQ : 365
R. pickettii unknown 1 : -----GNTLRVKVTGD-----RDPGYGSTCKMLGQ : 366
P. infestans unknown 1 : -----GKLAVKAKTVGS-----GDPGYRLTSRLISE : 377
E. siliculosus unknown 1 : -----GDGKDVVCRGKIVGS-----DKGDCGYKETAKMLAE : 374
T. pseudonana unknown 1 : -----GNVAESAMYFP-----HDGGYQSTARMIVE : 444
P. tricornutum unknown 1 : -----GNRAESIMYFD-----KDAGCLETSRMLVE : 446
A. niger unknown 1 : -----DTAKPQRVLGKTRY-----QGTMYEFTGLSLAE : 366
A. thaliana At5g39410 : -----EESLASQGETKPDLEIITRISG-----PEIGYITPPIILVQ : 404
P. sitchensis unknown 2 : -----DESCLLQQTKPDMIEIVTRISG-----PEVGYVTPIPIILVQ : 399
S. moellendorffii unk. 2 : -----DASKVPPGKKQPPDMEIITRVISG-----PEIGYVTPIPIILVQ : 397
C. variabilis unknown 2 : -----KGAPEAPDQAPDIEIVTRVSG-----PEPGYISCAEFVIVQ : 341
E. siliculosus unknown 2 : AGADPGEVEAAAAAPAPAPPTVEPDVTVVTRVKG-----PEPGYVATPIIFLA : 413
T. pseudonana unknown 2 : -----YSDGDSSQVARVKVGG-----PEPGYVATPALIVA : 413
Salpingoeca unknown 2 : -----SAAAAEARGAPDVTVKTRVSG-----PEPGYVATPIICIVQ : 375
H. sapiens unknown 2 : -----QGTGTDKKNPNKICTQVKG-----PEAGYVATPIIAMVQ : 380
C. elegans unknown 2 : -----RGDPRDREPKKLLVTCGTG-----PDVGYIATSGCVLS : 373
D. melanogaster unknown 2 : -----KSDRLAESSNQYTESPTKTLMVRVSG-----MNPYGATCIVAVLS : 381
A. thaliana At4g33150 SDH : -----VEFLESKRIEKHTATLLEFGDIKN-----GQTTTAMAKTVGIPAAI : 439
S. moellendorffii SDH : -----VVYEDSRSAERHSATLVAVGESCQLKNESRRPHSAMARTVGLTVAI : 434
P. tricornutum SDH : -----ASFERA-RSERHLASPVVFG-----EGISAMAKCVGYTTAS : 362
T. pseudonana SDH : -----AVFGDG-SNETLSCSMELYGD-----DRMTAMCKTVGFTAAI : 399
P. infestans SDH : -----IEYEDG-KKEKRTSTFVGYGS-----EKGDTIMAKTVGISAAI : 393
D. melanogaster SDH : -----IRWPDG-RREERGINFVVYQG-----PQGHSAMAMTVCKPAAI : 407
H. sapiens SDH : -----IRHPSG-HLEHKTIDLVAAYGD-----INGFSAMAKTVGIPPTAM : 404
S. cerevisiae SDH : -----IEWADG-TTETRTSTLVYDYGK-----VGGYSSMAATVGYPVAI : 401
A. niger SDH : -----IEHKDG-QKETRTSTLCEYGV-----PGGYSAMAKTVGVPVCGV : 404
Salpingoeca SDH : -----IQKKTG-DEYVVASTMLEYGI-----PFGATAMARTVGIIPCGI : 404

```

```

*          620          *          640          *          660
A. aestivalis HBFD1      : FAMAIIIEGST-----QPGVWVFEIEEPGGIAISDRELILQRASQCAINFIMKQ----- : 407
A. thaliana At1g50450    : FVAAMIEGST-----QPGVWVFEIEEPQGIAVEAREVLLKRASQGTNFILNKPPWMV    : 415
P. sitchensis           : FVRAVIEGNT-----QPGVWVFEIEEPEGIAVEARQQLLERAAGCTINFVMMNRPPWMV   : 429
S. moellendorffii      : FVVPLIQGKT-----LPGVWVFEIEQREGIPIECREGLLEKASTGTSRYAMIVSYHYHL   : 414
C. reinhardtii         : FAQSVIQGKT-----QPGVWVFEIEEKEAL--QDRRQFLQFAATCCSRFELNRSAWAL    : 435
E. siliculosus          : FVVATIRGDV-----RPGVWVFEIEEAFDD-EAKRGLLFDATRGAFMWERQEQGATA     : 473
P. tricornutum          : FAAAIVSGAV-----RDCIWFVEIEEAIQG-GVDAAAFLAAASVCAHTVIVSSEGMEI    : 442
N. punctiforme         : IAQLLIEGKL-----KKPGVFAVEEALPT--DIFEEVMQSRGIKINHNSWL----- : 368
Synechococcus PCC 7002 : VAEIVLSEQI-----NQPCLYPVEQIIPS--DIF--LAWARQHQLQLSWNIQPSSEKN    : 363
Cyanotheca ATCC 51142  : IVELLIEGEL-----VQPGVHPVEQALST--EILFQSLILKSRQLTIEKTIINFLQENEQ   : 373

C. reinhardtii unknown 1 : TGLALSLDAERLAADPRLAPGCVLTAAGCGH--VLLERLR--G-AGFTFEVAGVEGEGV    : 432
C. variabilis unknown 1 : AALCALQQQELDASPEVLKGCVLTEASAMGI--FLVERLR--N-ACQTEKILLEGGASTA    : 423
Salpingoeca unknown 1   : SAICLAQDTAKLPE----RYGFLTEIAAMGD--TLVARIQ--A-ACIDITVEDDKNTSS     : 420
Synechocystis unknown 1 : AALCALAKDRPKSSL----QCQFWTEAASFGQ--DLIHRLLI--DYAGLTFTEENGSTL--   : 414
R. pickettii unknown 1  : AAISLALDHTKDGLKGTG-RPGCFWTEATMFDD--RFIERLIT--RHAGLRFERI----- : 414
P. infestans unknown 1  : CAFCLAKDEFGDAKS---LKGCFYTEASAFGH--KILADRLQ--TKKFITFEIKDMA---- : 426
E. siliculosus unknown 1 : CGLCALDDLEY-----KKGCVLTTASAMGM--PLVDRLN--K-AGMTEKILDE----- : 418
T. pseudonana unknown 1 : SGLCALNEDRHEM----SQCGFYTEAGLMCA--ALLDRLV--N-SGTEFAIRSS----- : 490
P. tricornutum unknown 1 : SGLCALALEDKVPVPA---KHGCFWTEAAGLGN--VLLKRLI--E-TGTSFEARAISEASV   : 497
A. niger unknown 1      : AAMTILENEKVKKV---SRCCIVTAT-LGQ--EFLDRWD--K-VGCHIETQVVDN--- : 414

A. thaliana At5g39410   : CGLIIVLQGRESLVK----CGVYTFGIVFGS-TDIIQORLE--D-NGISFEHISKIKTQG    : 454
P. sitchensis unknown 2 : CALILLDQRHSLPK----CGVFPFGIVFGP-TDIIQORLE--K-NGISFEVLSKRTIS--   : 448
S. moellendorffii unk. 2 : AALLVLENRDKLPK----CGVWTFGVAFGT-TDYEQRLLQ--N-NGLSFDVISHK---- : 443
C. variabilis unknown 2 : AAITLLEERQSLGL----PGVHTFASLLRD-TTYIDRLR--S-RGKFEQVQDATVQ--   : 390
E. siliculosus unknown 2 : VARCLLEERSLPV----SCGVHTFGSVLVS-SSLVDRLG--K-DGVTFBVVG----- : 458
T. pseudonana unknown 2 : LALTLLEAGK--YEVGLAFDSGCTLEGALFGDCEKVDNMR--A-EGVSEFVVQVEFGGES   : 468
Salpingoeca unknown 2   : CALALIGNEGVPR----GVLTSATAFRH-TDIIQRLLN--G-AGVKFBVL----- : 417
H. sapiens unknown 2    : AAMTLLSDASHLPK----ACGVFTFGAAFST-KLIDRLN--K-HGIEFESVISSEV--   : 429
C. elegans unknown 2    : SVLVFIEKEKLPK----SCGVYTTAYAFEN-TRLDLFL--D-FGIKFDIEMPSKLL-- : 422
D. melanogaster unknown 2 : AALTLRESDKMPS----TGCVLPFAAFST-TGLISELEKHD-HGKFEHLANK---- : 430

A. thaliana At4g33150 SDH : GALLLIEDKI-----KTRGVLRLEAEVY-LPALDIQ--AY-GIKLMEKAE----- : 482
S. moellendorffii SDH   : GAELFTGRL-----KSRGVIRLQPEVY-VPGLEILG--KL-GLGVVES----- : 475
P. tricornutum SDH      : SAGLIFSALD-----DLLGLLLETSPRVY-EPVIAAKK--ESPSTKRAHQIRQTR-- : 410
T. pseudonana SDH      : GTKLIEGGI-----TNKGLLLETSKDVY-TPSELELR--EE-GI----- : 435
P. infestans SDH       : GVQLIQDAV-----QGRGVLTETTPDIY-GPALARLE--VE-GVRFIEKTFPQH-- : 439
D. melanogaster SDH    : AAKMLIDGEI-----QERGVLLFTTPDIY-RPMLQRLR--SE-GLTATETSRWLN-- : 453
H. sapiens SDH        : AAKMLIDGEI-----GAKCLMGFYSPEIN-DPIMKELK--AE-GIIVTQSTIKP-- : 450
S. cerevisiae SDH     : ATKFVIDGTI-----KGPGLLABYSPEIN-DPIMKELK--DKYGIYLKERTVA---- : 446
A. niger SDH          : AVKLVLDGTI-----NQKCVVAMTMDIC-APLIKTK--EDYGIEMIEKTL----- : 448
Salpingoeca SDH       : AVQLIIDGKI-----TRKGVFAEMTKDIY-QPLIAELE--KE-GIGCKEYELDEWTH   : 452

```

```

*
A. thaliana At1g50450    : ETEPKEVVLGIYV----- : 428
P. sitchensis           : ETNPKEIFGFIYMQ----- : 443
S. moellendorffii      : H----- : 415
C. reinhardtii         : ESEIKQIGGMIYW----- : 448
E. siliculosus          : VEGAPL----- : 479
P. tricornutum          : SLEQVWGTTRRKETITMTST : 461
C. reinhardtii unknown 1 : AAAK----- : 436
Salpingoeca unknown 1   : TPPSSL----- : 426
P. tricornutum unknown 1 : RHSLE----- : 502
T. pseudonana unknown 2 : QSPV----- : 472

```

**Supplemental Figure 6 (below).** Absorption Spectra for Peaks in the HPLC Elution Profiles Displayed in Figures 3A, 3D, 3E, and 5A of the Manuscript. Panels (A), (B), (C) and (D) reproduce HPLC elution profiles of the manuscript figures. Shown are elution profiles for extracts of *E. coli* cultures containing the following plasmids: **(A)**, pAC-BETAipi; **(B)**, pAC-BETAipi and pCBFD1/HBFD1Bad; **(D)**, pAC-CANTHiipi. Panel **(C)** displays an HPLC elution profile for a synthetic astaxanthin standard. Panels **(E)**, **(F)**, and **(G)** display absorption spectra for peaks in the elution profiles of panels (A), (B), (C) and (D). Numbers in parentheses below the carotenoid names in panels (A), (B), (C) and (D) are HPLC retention times in minutes. Labels for the absorption spectra in (E), (F), and (G) refer to the HPLC retention times for the corresponding peaks in (A), (B), (C) and (D). Absorption maxima are listed below these HPLC retention times, with peak “shoulders” enclosed in parentheses. Spectra were recorded in HPLC mobile phase just as the individual pigments were eluted from the HPLC column. **Note:** it can be seen that the peak for the astaxanthin standard in (C) is noticeably broader than that for astaxanthin in (B), despite a lower loading of pigment (*ca.* 1/3 the amount of that for the sample analyzed in panel B). This is probably because the standard compound was a racemic mixture, whereas astaxanthin produced through the action of the *A. aestivalis* enzymes in *E. coli* is most likely a single isomer, (3*S*, 3'*S*)-astaxanthin, as was reported for astaxanthin extracted from the flower petals of *A. aestivalis* (Kamata and Simpson, 1987) and *A. annua* (Renstrøm et al., 1981).

#### References for Supplemental Figure 6:

- Kamata, T., and Simpson, K.L.** (1987) Study of astaxanthin diester extracted from *Adonis aestivalis*. *Comp. Biochem. Physiol. B* **86**: 587-591.
- Renstrøm, B., Berger, H., and Liaaen-Jensen, S.** (1981) Esterified, optically pure (3*S*, 3'*S*)-astaxanthin from flowers of *Adonis annua*. *Biochem. Syst. Ecol.* **9**: 249-250.

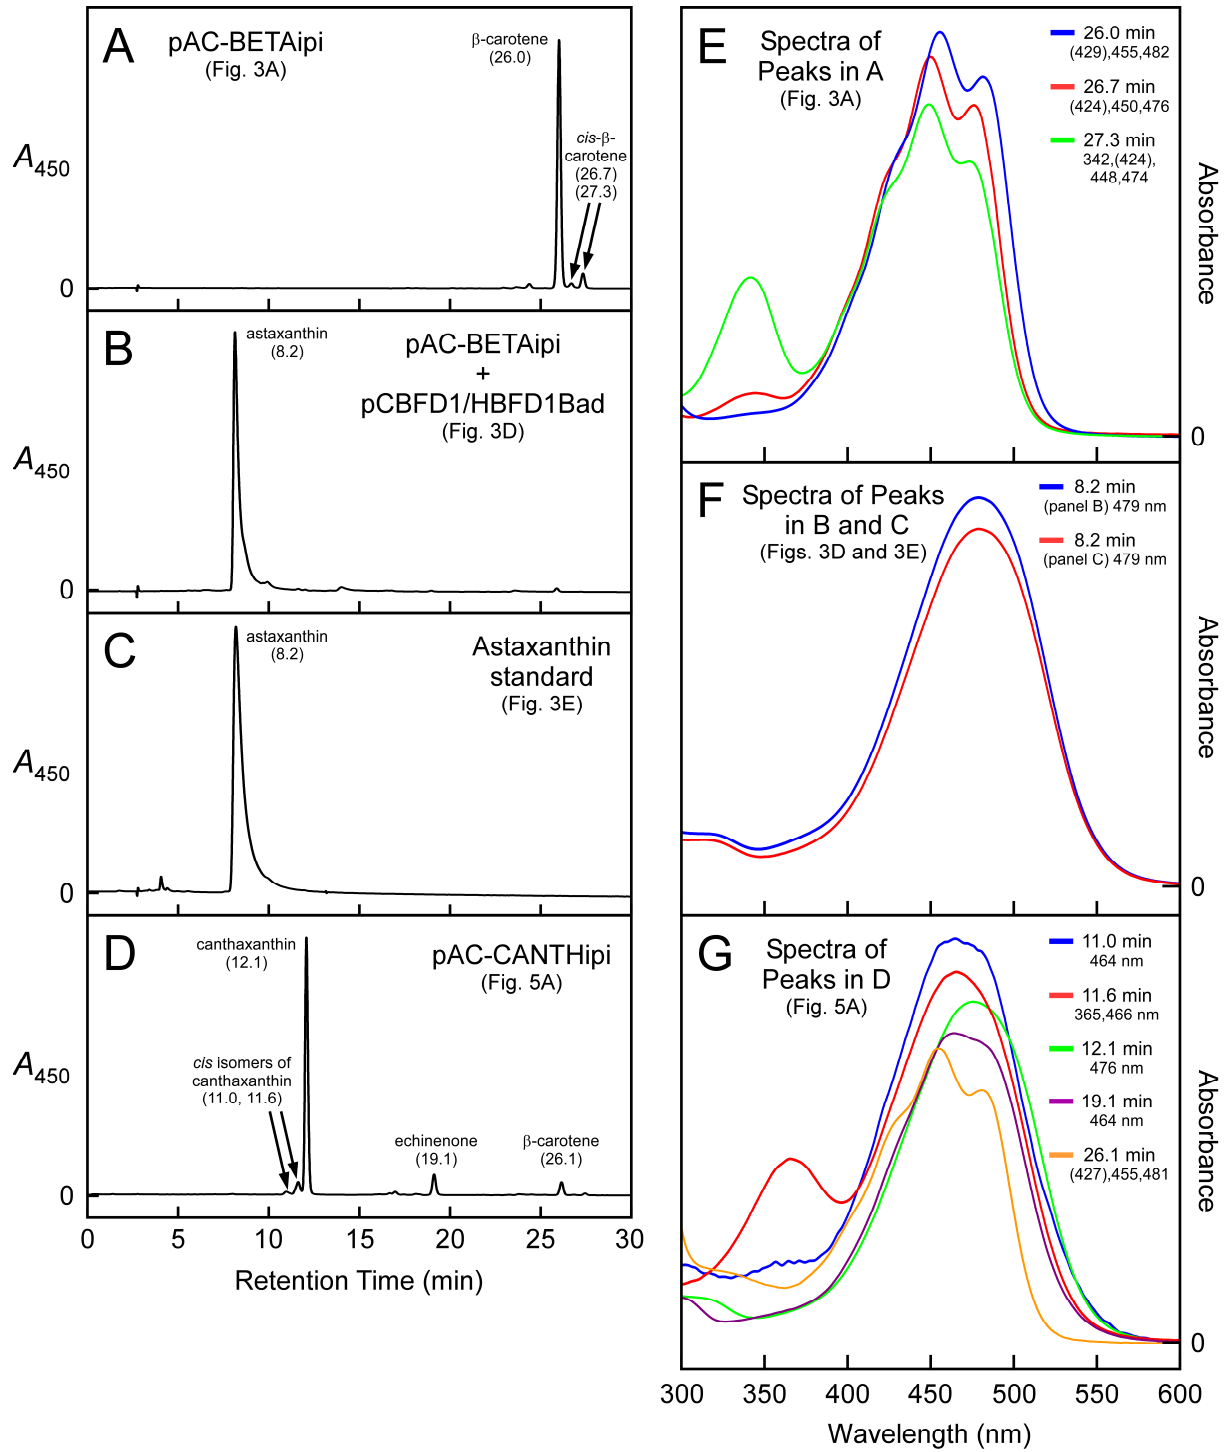

**Supplemental Figure 7 (below).** Absorption Spectra for Peaks in the HPLC Elution Profiles Displayed in Figures 3B, 5B, and 5C of the Manuscript. Reproduced here, from figures in the manuscript, are HPLC elution profiles for extracts of *E. coli* cultures wherein cells contained the following plasmids: **(A)**, pAC-BETA and pCBFD1; **(B)**, pAC-CANTH<sub>ipi</sub> and pCBFD2; **(C)**, pAC-CANTH<sub>ipi</sub> and pHBFD1Bad. Absorption spectra for peaks in the elution profiles of **(A)**, **(B)** and **(C)** are shown in panels **(D)**, **(E)** and **(F)**, respectively. Numbers in parentheses below the carotenoid names in panels **(A)**, **(B)** and **(C)** are HPLC retention times in minutes. Labels for the absorption spectra in **(D)**, **(E)** and **(F)** refer to the HPLC retention times for the corresponding peaks in **(A)**, **(B)** and **(C)**. Absorption maxima are listed below these retention times, with peak “shoulders” enclosed in parentheses. Spectra were recorded in the HPLC mobile phase just as the individual pigments eluted from the HPLC column. Those peak identifications indicated with red text and followed by question marks in panels **(B)** and **(C)** are speculative: they are consistent with the absorption spectra, the HPLC retention times, and the known catalytic capabilities of the carotenoid pathway enzymes that are present in the *E. coli* cells, but the requisite standards were not available for comparison.



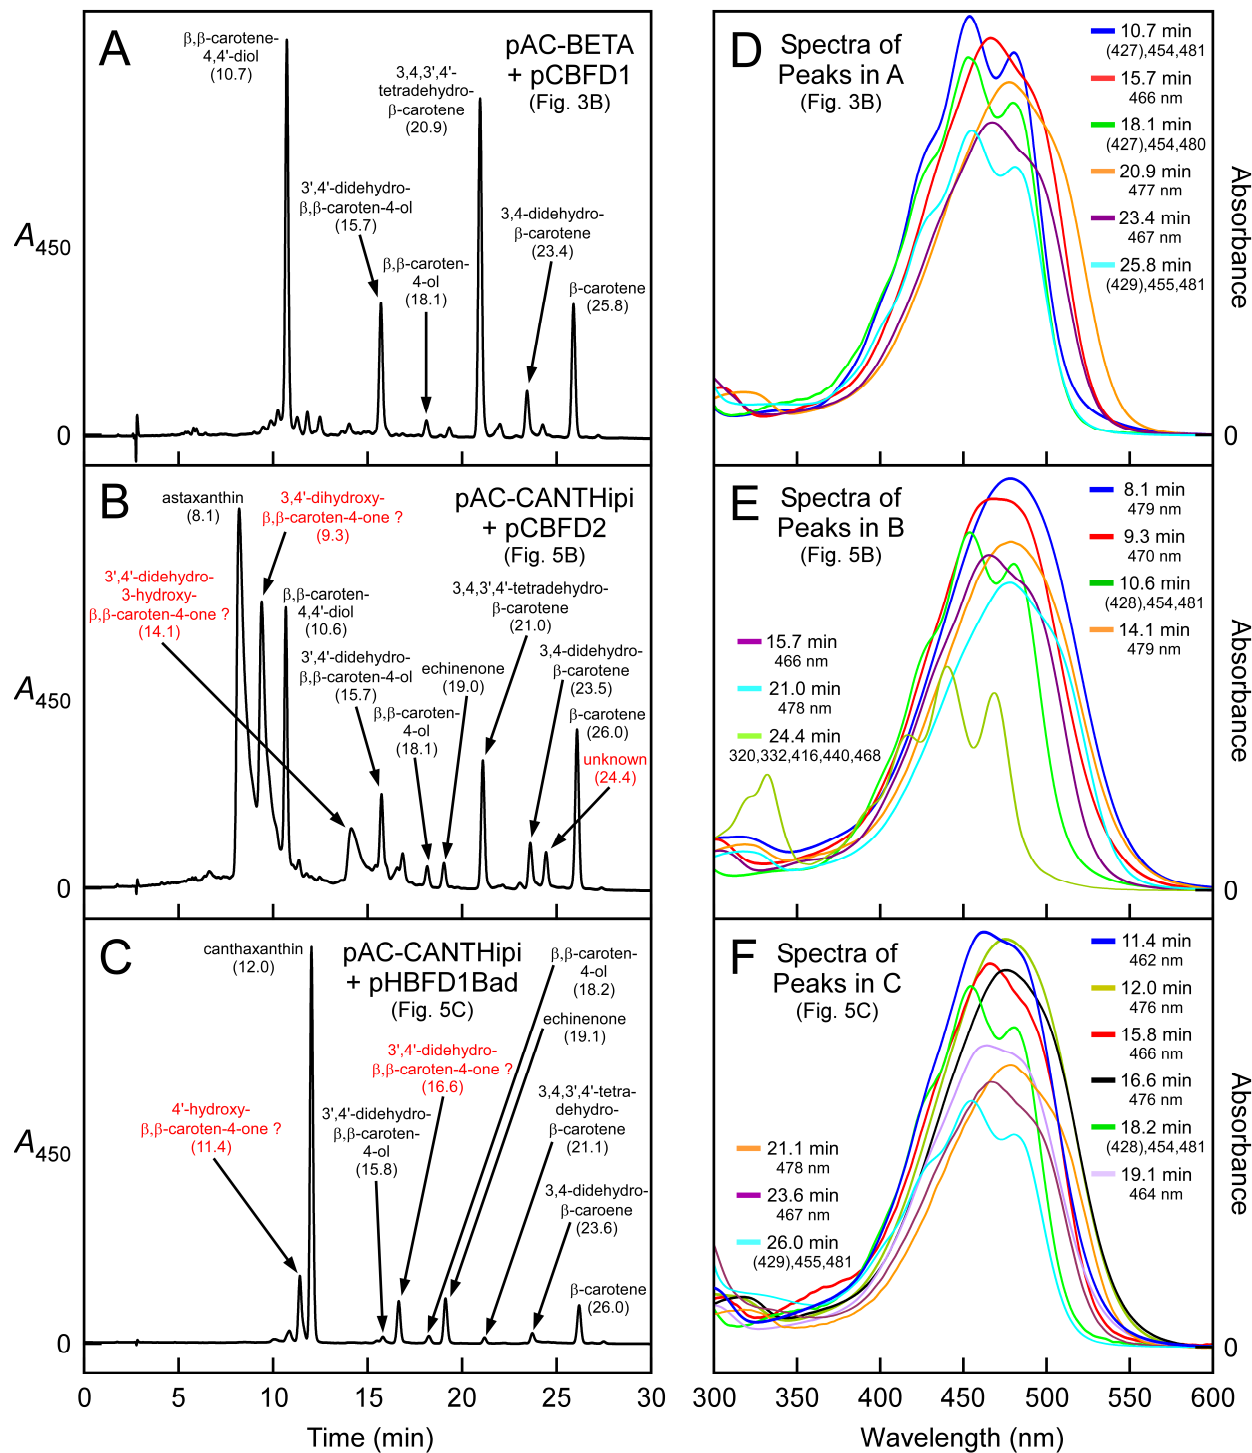

**Supplemental Figure 8 (below).** HPLC Elution Profiles, with Absorption Spectra of Selected Peaks, for Two Pigment Extracts that Provided Data for the Time Course Studies Shown in Figure 4 of the Manuscript. Panels (A) and (B) show HPLC elution profiles. Panels (C) and (D) display absorption spectra for selected peaks in (A) and (B). Numbers in parentheses below the carotenoid names in panels (A) and (B) are HPLC retention times in minutes. Labels for the absorption spectra in (C) and (D) refer to the HPLC retention times for the corresponding peaks in (A) and (B). Absorption maxima are listed below these retention times, with peak “shoulders” enclosed in parentheses. Spectra were recorded in the HPLC mobile phase just as the individual pigments eluted from the HPLC column. Samples were taken 45 min after the addition of arabinose to induce production of the enzyme encoded by *cbfd2*. **Note:** a somewhat different mobile phase gradient was used here (4 to 50% mobile phase B in mobile phase A over the course of 35 min; other analyses employed a gradient of 10 to 50% A in B over 30 min) in order to achieve a near baseline separation for all pigments of interest. The various intermediates and end products can be seen to be well separated in the HPLC system employed. Notice that peaks for carotenoids with 3-hydroxy-4-keto- $\beta$ -rings [*i.e.* astaxanthin and adonirubin (3-hydroxy- $\beta,\beta$ -carotene-4,4'-dione)] tailed much more than did other peaks.

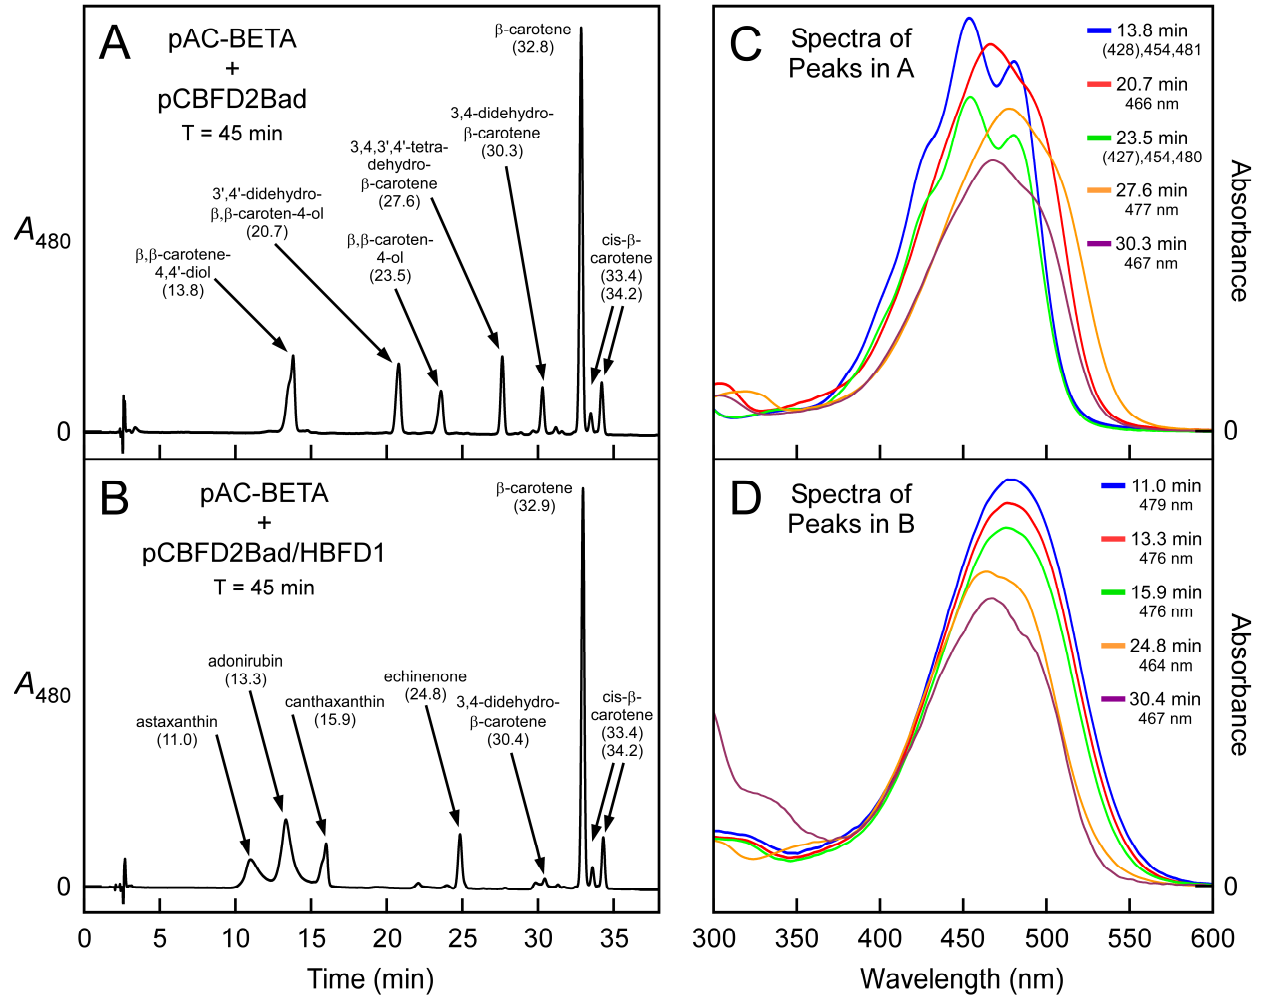

**Supplemental Table 1 (below)** lists some of the many cDNAs that were selected in a color complementation screen (see Figure 2B of the manuscript) of an *A. aestivale* flower library in *E. coli* that contained the plasmid pAC-BETA-CBFD1/2. With the exception of those containing *AdKC17* (*hbfd1*) and *AdKC28* (*hbfd2*), plasmids containing the selected cDNAs had little effect, if any, on the composition of the carotenoids that accumulated in *E. coli* containing plasmid pAC-BETA-CBFD1/2, but rather increased the total amount of pigment, or perhaps only affected the distribution of the pigment within the cell, so that the colonies that contained them appeared a darker orange in color than the preponderance of colonies on agar plates.

Certain of the cDNAs in library plasmids recovered from the selected colonies encoded enzymes of the isoprenoid pathway (isopentenyl diphosphate isomerase and 1-deoxy-*D*-xylulose-5-phosphate synthase) that produces the substrates required for carotenoid biosynthesis. Such cDNAs were expected, and are routinely selected in screens of plant cDNA libraries for cDNAs that enhance carotenoid accumulation in *E. coli* (Cunningham and Gantt, 2007). Very much unexpected were the many and various cDNAs that encoded polypeptides with no apparent relevance to carotenoid biosynthesis. We conjecture that the products of these cDNAs either affect the distribution of carotenoid pigments within the cell (thereby giving the appearance of increased pigment content), or enhance the accumulation of carotenoids by somehow providing or increasing the size of a “sink”. The enhancement (or apparent enhancement) of carotenoid accumulation engendered by these cDNAs appears, in many cases, to be dependent on the structure of the carotenoid molecule. Many of these same cDNAs were selected when screening various other plant cDNA libraries in *E. coli* engineered to accumulate zeaxanthin, but they were not selected when screens were carried out using *E. coli* engineered to accumulate the much less polar carotenoids lycopene and  $\beta$ -carotene (F.X. Cunningham, Jr. and E. Gantt, unpublished).

**Supplemental Table 1.** *Adonis aestivalis* cDNAs Selected in a Color Complementation Screen<sup>a</sup> Carried out Using *E. coli* Containing the Plasmid pAC-BETA-CBFD1/2 as Host

| cDNA           | GenBank Accession | Top blastx hit (% identity) <sup>b</sup>                                            | Relevance to carotenoids | Carotenoid composition <sup>c</sup> |
|----------------|-------------------|-------------------------------------------------------------------------------------|--------------------------|-------------------------------------|
| <i>AdKC22</i>  | AF188060          | <i>A. aestivalis</i> isopentenyl diphosphate isomerase 1 (100%)                     | precursor supply         | unchanged                           |
| <i>AdKC10</i>  | AF188061          | <i>A. aestivalis</i> isopentenyl diphosphate isomerase 2 (100%)                     | “                        | “                                   |
| <i>AdBDY19</i> | EF489295          | <i>Apis mellifera</i> (honey bee) isopentenyl diphosphate isomerase (57%)           | “                        | “                                   |
| <i>AdKC13</i>  | EF489296          | <i>Ustilago maydis</i> (corn smut fungus) isopentenyl diphosphate isomerase (76%)   | “                        | “                                   |
| <i>AdDY7</i>   | EF043284          | <i>Chrysanthemum x morifolium</i> deoxyxylulose 5-phosphate isomerase (85%)         | “                        | “                                   |
| <i>AdKC18</i>  | EU348732          | <i>Vitis vinifera</i> serine/threonine kinase (94%)                                 | sink ?                   | unchanged                           |
| <i>AdKC24</i>  | EU348733          | <i>V. vinifera</i> ribosomal protein S25 (89%)                                      | “                        | “                                   |
| <i>AdKC25</i>  | EU348734          | <i>Ricinus communis</i> iron transport protein 2 (54%)                              | “                        | “                                   |
| <i>AdKC26</i>  | EU348735          | <i>Pistacia vera</i> dehydrin (53%)                                                 | “                        | “                                   |
| <i>AdKC30</i>  | EU348736          | <i>Arabidopsis thaliana</i> unknown protein, mucin-related (65%)                    | “                        | “                                   |
| <i>AdKC31</i>  | EU348737          | <i>V. vinifera</i> ADP-ribosylation factor-like protein (91%)                       | “                        | “                                   |
| <i>AdKC32</i>  | EU348738          | <i>V. vinifera</i> nuclear RNA binding protein (67%)                                | “                        | “                                   |
| <i>AdKC33</i>  | EU348739          | <i>Phaseolus vulgaris</i> polyubiquitin (100%)                                      | “                        | “                                   |
| <i>AdKC14</i>  | AY644757          | <i>A. aestivalis</i> carotenoid $\beta$ -ring 4-dehydrogenase CBFD1 (AdKeto1; 100%) | pathway enzyme           | unchanged                           |
| <i>AdKC17</i>  | DQ902555          | <i>A. thaliana</i> unknown protein, saccharopine dehydrogenase family (65%)         | pathway enzyme           | altered                             |
| <i>AdKC28</i>  | DQ902556          | <i>A. thaliana</i> unknown protein, saccharopine dehydrogenase family (66%)         | pathway enzyme           | altered                             |

<sup>a</sup> Colonies of a darker orange color than that exhibited by the preponderance of colonies on agar plates were selected in this screen.

<sup>b</sup> From a search of the GenBank protein database on March 15, 2010.

<sup>c</sup> Cultures inoculated with the selected colonies were harvested in early stationary phase, the pigments were extracted with absolute acetone, and the acetone extracts were analyzed by reverse-phase TLC.

**Supplemental Table 2.** HPLC Retention Times and Absorption Peaks for Known Carotenoids

| Ret. Time (min) <sup>a</sup> | Common Name                      | Semi-Systematic Name                               | Absorption Peaks <sup>b</sup> (nm) | Absorption Spectrum |
|------------------------------|----------------------------------|----------------------------------------------------|------------------------------------|---------------------|
| 8.0-8.2                      | astaxanthin                      | 3,3'-dihydroxy- $\beta,\beta$ -carotene-4,4'-dione | 478                                | Sup. Fig. 6F        |
| 10.6-10.7                    | isozeaxanthin                    | $\beta,\beta$ -carotene-4,4'-diol                  | (427), 454, 481                    | Sup. Fig. 7D        |
| 12.0-12.1                    | canthaxanthin                    | $\beta,\beta$ -carotene-4,4'-dione                 | 476                                | Sup. Fig. 6G        |
| 13.2-13.3                    | zeaxanthin                       | $\beta,\beta$ -carotene-3,3'-diol                  | (430), 455, 482                    | Sup. Fig. 1E        |
| 15.7                         | 3',4'-didehydro-isocryptoxanthin | 3',4'-didehydro- $\beta,\beta$ -caroten-4-ol       | 466, asymmetric peak               | Sup. Fig. 7D        |
| 18.1-18.2                    | isocryptoxanthin                 | $\beta,\beta$ -caroten-4-ol                        | (427), 454, 480                    | Sup. Fig. 7D        |
| 19.1                         | echinenone                       | $\beta,\beta$ -caroten-4-one                       | 464                                | Sup. Fig. 6G        |
| 20.9-21.1                    |                                  | 3,4,3',4'-tetrahydro- $\beta,\beta$ -carotene      | 477, asymmetric peak               | Sup. Fig. 7D        |
| 23.4-23.6                    |                                  | 3,4-didehydro- $\beta,\beta$ -carotene             | 467, asymmetric peak               | Sup. Fig. 7D        |
| 25.9-26.1                    | $\beta$ -carotene                | $\beta,\beta$ -carotene                            | (429), 455, 482                    | Sup. Fig. 6E        |

<sup>a</sup> For HPLC with a mobile phase gradient of 10-50% B in A over the course of 30 min.

<sup>b</sup> In the HPLC mobile phase.
